# Supplementary material for: Thinking green: modelling respirator reuse strategies to reduce cost and waste
Source: PubMed Central journal article supplement — BMJ Open. 2021 Jul 18;11(7):e048687. doi: 10.1136/bmjopen-2021-048687 (PMC8290946; doi:10.1136/bmjopen-2021-048687), 2021-07-18
Supplement: bmjopen-2021-048687.draft_revisions.pdf [file bmjopen-2021-048687.draft_revisions.pdf]

# BMJ Open

BMJ Open is committed to open peer review. As part of this commitment we make the peer review history of every article we publish publicly available.

When an article is published we post the peer reviewers' comments and the authors' responses online. We also post the versions of the paper that were used during peer review. These are the versions that the peer review comments apply to.

The versions of the paper that follow are the versions that were submitted during the peer review process. They are not the versions of record or the final published versions. They should not be cited or distributed as the published version of this manuscript.

BMJ Open is an open access journal and the full, final, typeset and author-corrected version of record of the manuscript is available on our site with no access controls, subscription charges or pay-per-view fees (<http://bmjopen.bmj.com>).

If you have any questions on BMJ Open's open peer review process please email [info.bmjopen@bmj.com](mailto:info.bmjopen@bmj.com)

# BMJ Open

## Thinking green: respirator reuse strategies to reduce cost and waste

|                               |                                                                                                                                                                                                                                                                                                                                                                                                                                                                                                                                                                                                                                                                                                                                                                                                                                                                        |
|-------------------------------|------------------------------------------------------------------------------------------------------------------------------------------------------------------------------------------------------------------------------------------------------------------------------------------------------------------------------------------------------------------------------------------------------------------------------------------------------------------------------------------------------------------------------------------------------------------------------------------------------------------------------------------------------------------------------------------------------------------------------------------------------------------------------------------------------------------------------------------------------------------------|
| Journal:                      | <i>BMJ Open</i>                                                                                                                                                                                                                                                                                                                                                                                                                                                                                                                                                                                                                                                                                                                                                                                                                                                        |
| Manuscript ID                 | bmjopen-2021-048687                                                                                                                                                                                                                                                                                                                                                                                                                                                                                                                                                                                                                                                                                                                                                                                                                                                    |
| Article Type:                 | Original research                                                                                                                                                                                                                                                                                                                                                                                                                                                                                                                                                                                                                                                                                                                                                                                                                                                      |
| Date Submitted by the Author: | 04-Jan-2021                                                                                                                                                                                                                                                                                                                                                                                                                                                                                                                                                                                                                                                                                                                                                                                                                                                            |
| Complete List of Authors:     | <p>Chu, Jacqueline; Massachusetts General Hospital, Division of Gastroenterology, Department of Medicine; Massachusetts Institute of Technology</p> <p>Ghenand, Omkar; Massachusetts Institute of Technology</p> <p>Collins, Joy; Brigham and Women's Hospital; Massachusetts Institute of Technology</p> <p>Byrne, James; Harvard Radiation Oncology Program; Massachusetts Institute of Technology</p> <p>Wentworth, Adam; Massachusetts Institute of Technology; Brigham and Women's Hospital</p> <p>Chai, Peter; Brigham and Women's Hospital; Massachusetts Institute of Technology</p> <p>Dadabhoy, Farah; Brigham and Women's Hospital; Massachusetts Institute of Technology</p> <p>Hur, Chin; Columbia University Medical Center</p> <p>Traverso, Giovanni; Brigham and Women's Hospital, ; Massachusetts Institute of Technology, Mechanical Engineering</p> |
| Keywords:                     | COVID-19, Health economics < HEALTH SERVICES ADMINISTRATION & MANAGEMENT, HEALTH SERVICES ADMINISTRATION & MANAGEMENT, INFECTIOUS DISEASES                                                                                                                                                                                                                                                                                                                                                                                                                                                                                                                                                                                                                                                                                                                             |
|                               |                                                                                                                                                                                                                                                                                                                                                                                                                                                                                                                                                                                                                                                                                                                                                                                                                                                                        |

SCHOLARONE™  
Manuscripts

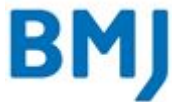

I, the Submitting Author has the right to grant and does grant on behalf of all authors of the Work (as defined in the below author licence), an exclusive licence and/or a non-exclusive licence for contributions from authors who are: i) UK Crown employees; ii) where BMJ has agreed a CC-BY licence shall apply, and/or iii) in accordance with the terms applicable for US Federal Government officers or employees acting as part of their official duties; on a worldwide, perpetual, irrevocable, royalty-free basis to BMJ Publishing Group Ltd ("BMJ") its licensees and where the relevant Journal is co-owned by BMJ to the co-owners of the Journal, to publish the Work in this journal and any other BMJ products and to exploit all rights, as set out in our [licence](#).

The Submitting Author accepts and understands that any supply made under these terms is made by BMJ to the Submitting Author unless you are acting as an employee on behalf of your employer or a postgraduate student of an affiliated institution which is paying any applicable article publishing charge ("APC") for Open Access articles. Where the Submitting Author wishes to make the Work available on an Open Access basis (and intends to pay the relevant APC), the terms of reuse of such Open Access shall be governed by a Creative Commons licence – details of these licences and which [Creative Commons](#) licence will apply to this Work are set out in our licence referred to above.

Other than as permitted in any relevant BMJ Author's Self Archiving Policies, I confirm this Work has not been accepted for publication elsewhere, is not being considered for publication elsewhere and does not duplicate material already published. I confirm all authors consent to publication of this Work and authorise the granting of this licence.

## Thinking green: respirator reuse strategies to reduce cost and waste

Jacqueline N. Chu, MD (1,2), Omkar Ghenand (3), Joy Collins, MPH (2,4), James Byrne, MD, PhD (2,5), Adam Wentworth, MS (2,4), Peter R Chai, MD MMS (2,6), Farah Dadabhoy, MD (2,6), Chin Hur, MD, MPH (7,8), Giovanni Traverso, MB, BChir, PhD\* (4,9)

\*1 Division of Gastroenterology, Massachusetts General Hospital, Harvard Medical School, Boston, MA 02114, USA. Correspondence to: [ctraverso@bwh.harvard.edu](mailto:ctraverso@bwh.harvard.edu)

2 David H. Koch Institute for Integrative Cancer Research, Massachusetts Institute of Technology, Cambridge, MA 02142, USA

3 Massachusetts Institute of Technology, Cambridge, MA 02142, USA

4 Division of Gastroenterology, Brigham and Women's Hospital, Harvard Medical School, Boston, MA 02115, USA

5 Harvard Radiation Oncology Program, Boston, MA 02114, USA

6 Department of Emergency Medicine, Brigham and Women's Hospital

7 Department of Medicine, Columbia University Medical Center, New York, NY 10032, USA

8 Department of Epidemiology, Mailman School of Public Health and Herbert Irving Comprehensive Cancer Center, Columbia University Medical Center, New York, NY 10032, USA

9 Department of Mechanical Engineering, Massachusetts Institute of Technology, 77 Massachusetts Ave, Cambridge, MA 02139, USA

Word Count: 3,700

**Abstract:**

**Objectives** To compare the impact of respirator extended use and reuse strategies with regard to cost and sustainability during the COVID-19 pandemic.

**Design** Cost analysis

**Setting** United States

**Participants** All healthcare workers within the United States

**Interventions** Not applicable

**Main outcome measures** A model was developed to estimate usage, costs, and waste incurred by several respirator usage strategies over the first 6-months of the pandemic in the United States. This model assumed universal masking of all healthcare workers. Estimates were taken from the literature, government databases, and commercially available data from approved vendors.

**Results** A new N95 respirator per patient encounter would require 7.41 billion respirators, cost \$6.38 billion, and generate 84.0 million kg of waste in the U.S. over 6-months. One respirator per day per healthcare worker would require 3.29 billion respirators, \$2.83 billion, and 37.22 million kg of waste. Decontamination by ultraviolet germicidal irradiation would require 1.64 billion respirators, \$1.41 billion, and 18.61 million kg of waste. H<sub>2</sub>O<sub>2</sub> vapor decontamination would require 1.15 billion respirators, \$1.40 billion, and 13.03 million kg of waste. One reusable respirator with daily disposable filters would require 18 million respirators, \$1.24 billion, and generate 15.73 million kg of waste. Pairing a reusable respirator with UVGI or H<sub>2</sub>O<sub>2</sub> vapor-decontaminatable filters would reduce cost to \$581.48 million and generate 1.58 million kg of waste. The use of one surgical mask per day would require 3.29 billion masks, cost \$493 million, and generate 20.86 million kg of waste.

**Conclusions** Reuse-based strategies decreased the number of respirators used, costs, and waste generated compared to single- or daily extended-use of disposable respirators. Future development of low-cost, low-tech technologies to enable respirator and/or filter decontamination is needed to further minimize the economic and environmental costs of masks.

**Trial registration** Not applicable

**Keywords** Covid-19, environmental health, health economics

**Strengths and limitations of this study**

- To our knowledge, this study is one of the first to assess the economic and environmental impact of different respirator reuse strategies to accommodate widespread respirator use among healthcare workers on a national scale in the United States.
- This study reviews cost and waste estimates specific to respirator use in order to meet the demands of the COVID-19 pandemic. Potential cost and waste reductions as a result of reuse strategies were explored, including more recently developed technologies such as ultraviolet germicidal irradiation, hydrogen peroxide vapor decontamination, and reusable respirators.
- This study could help inform optimal respirator reuse strategies to reduce the economic and environmental toll during the COVID-19 pandemic.
- This study estimates only a few respirator strategies and decontamination methods. Other methods for extended respirator use and reuse, the implementation of different reusable respirator designs, and inexpensive, low tech methods for decontamination should be evaluated.

- 1  
2  
3  
4  
5  
6  
7  
8  
9  
10  
11  
12  
13  
14  
15  
16  
17  
18  
19  
20  
21  
22  
23  
24  
25  
26  
27  
28  
29  
30  
31  
32  
33  
34  
35  
36  
37  
38  
39  
40  
41  
42  
43  
44  
45  
46  
47  
48  
49  
50  
51  
52  
53  
54  
55  
56  
57  
58  
59  
60
- This study was conducted from a US perspective and input parameters such as the number of healthcare workers, rates of infection, hospitalization rates, etc. will be different for other countries. Also, this did not include costs such as installation, maintenance, distribution, or personnel.

For peer review only

## Introduction

The COVID-19 pandemic has led to personal protective equipment (PPE) shortages worldwide, including shortage of N95 respirators and surgical masks.[1-3] In order to maximize resources, many hospitals have adopted extended use of masks or decontamination and reuse strategies, particularly of N95 respirators.[1, 4, 5] Prior to the pandemic, a new N95 respirator was typically used for each patient encounter and then discarded.[5, 6] In light of the PPE shortage, some hospitals have now moved to using one respirator per several encounters or even several days.[4, 6] Decontamination strategies such as hydrogen peroxide vapor (H<sub>2</sub>O<sub>2</sub>) and ultraviolet germicidal irradiation (UVGI) are being adopted and thus far appear effective, but concerns about decontamination reducing mask fit and integrity remain, as well as concerns regarding cost of the technology.[5-9]

The United States government recently awarded a \$415 million contract to Battelle to deploy 60 hydrogen peroxide vapor decontamination sites across the country.[6, 7] While this may be feasible in resource-rich settings, the hydrogen peroxide system requires significant infrastructure and trained personnel, limiting its translation to resource-constrained areas.[7, 9] There is therefore a need for simpler methods of respirator decontamination that can be deployed on a large scale.[10] Investigations into heat, steam, and detergent decontamination are ongoing; however, these have thus far been shown to compromise mask integrity.[3, 5] Nebraska Medicine has recently piloted a UVGI system that has been approved by the United States Centers for Disease Control and Prevention (CDC), which may be easier to deploy for hospitals that already have UV decontamination systems in place.[11] Reusable respirators such as half-mask elastomeric respirators are available but have not been heavily adopted due to challenges with sterilization, cost, and bulky size.[10] Several scalable, less expensive reusable respirators have been recently developed that can be easier to decontaminate using standard hospital equipment to try to address the respirator shortage.[10, 12] The Pneumask project for example, which repurposes snorkel masks, has already distributed more than 23,000 masks internationally.[12, 13] Potential benefits of such reusable respirators compared to disposable respirators could include reduced cost and waste. Rough estimates show the COVID-19 pandemic is expected to generate up to 7,200 tons a day in medical waste, a sizable portion of which comes from masks.[14, 15] A reusable respirator could be a more sustainable alternative to disposable respirators, particularly if respirator and mask usage becomes more commonplace post-pandemic, such as in Asia.[16-18] Already environmentalists have noted a surge in plastic pollution from discarded masks in the ocean and continued heavy use of disposable PPE is unlikely to be sustainable.[14, 15, 19]

The optimal respirator use strategy that maximizes supply, minimizes cost, and minimizes waste is unknown. This analysis estimates respirator use, cost, and waste generation in the United States over the course of the first six months of the COVID-19 pandemic to explore the optimal strategy for respirator use.

## Methods

### *Data sources*

We estimated respirator usage, cost and waste from late March 2020 to late September 2020. The input parameters for the model are found in Tables 1-3. Data was sourced and adapted from the scientific literature or national databases. Base case respirator cost and waste estimates used the 3M 1860 disposable respirator as well as a recently published reusable respirator.[10]

**Table 1 Parameters used to estimate respirator usage, costs, and waste generation**

| Parameter                                                         | Value              | Reference |
|-------------------------------------------------------------------|--------------------|-----------|
| US Population as of 2019                                          | 328.2 million      | [20]      |
| Total number of healthcare and frontline workers in US as of 2020 | 18 (17-19) million | [21-23]   |
| Weight of one N95 respirator                                      | 11.33 g            | [24]      |
| Weight of one surgical mask                                       | 6.35 g             | [25]      |

|                                                                                                                                                |                 |      |
|------------------------------------------------------------------------------------------------------------------------------------------------|-----------------|------|
| Total cost of assembled reusable respirator (minus filters)                                                                                    | \$6.11 USD      | [10] |
| Weight of one reusable respirator                                                                                                              | 46.5 g          | [10] |
| Weight of one reusable respirator filter                                                                                                       | 2.26 g          | [10] |
| Cost of one pair of filters required per reusable respirator                                                                                   | \$0.34 USD      | [10] |
| Cost of one surgical mask                                                                                                                      | \$0.15 USD      | [26] |
| Cost of one Standard N95 respirator                                                                                                            | \$0.86 USD      | [26] |
| Cost of the National Battelle System Funded by the FDA                                                                                         | 415 million USD | [6]  |
| Reduction in the number of respirators required for HCW population in the US by the use of H <sub>2</sub> O <sub>2</sub> Vapor Decontamination | 20-fold         | [6]  |
| Reduction in the number of respirators required for HCW population in the US by the use of UVGI                                                | 5-fold          | [11] |

### *Respirator usage*

We considered seven respirator usage strategies: one respirator per patient encounter, one respirator per healthcare worker (HCW) per day, extended use of one respirator per HCW per day enabled by daily H<sub>2</sub>O<sub>2</sub> vapor decontamination, extended use of one respirator per HCW per day enabled by daily UVGI decontamination, one reusable respirator with disposable filters per HCW, one reusable respirator with H<sub>2</sub>O<sub>2</sub> vapor-decontaminated filters per HCW, and one surgical mask per HCW per day. We assumed that HCWs would be masked for all patient encounters (universal masking) given ongoing limited access to rapid COVID-19 testing nationally.[27-29] For the H<sub>2</sub>O<sub>2</sub> and UVGI decontamination strategies, we accounted for a 30% respirator discard rate due to soiled or damaged respirators as has previously been reported.[30] For each usage strategy, we considered low, average and high estimates for the size of the HCW population (17-19 million) based on estimates from the CDC, the Bureau of Labor Statistics, and published literature.[21-23]

For the one respirator per patient encounter strategy, we estimated respirators required by HCWs with exposure to patients and those without. The number of respirators required for HCWs due to patient contact were based on the number of hospitalized patients (COVID and non-COVID), average length of stay (LOS), and average number of visits from HCWs per day (Table 2).[21] Data for the number of respirators required per patient per day, LOS per patient, and the number of ICU and hospital admissions was extracted from the recent COVID-19 literature, government reports and a previous influenza study estimating respirator usage to prevent aerosol transmission.[21, 31-34] To estimate the number of overall hospitalized patients, we incorporated drops in hospital admission rates due to the pandemic, which were as high as 42.8% below usual rates of admissions in April before rebounding down to about 15.9% below usual rates in June/July.[35] In addition, HCWs with patient contact were estimated to be using 4 respirators per day in between direct patient care. [21, 36] HCWs without patient contact were assumed to be using 1 respirator per day (Table 3).

**Table 2 Hospitalization-specific parameters used to estimate number of respirators required by the one respirator per patient encounter strategy over 6-months**

| Parameter                                       | Total      | Reference |
|-------------------------------------------------|------------|-----------|
| Number of hospital admissions                   | 14,227,773 | [37]      |
| Number of patients admitted to the general ward | 12,583,927 | [31, 37]  |
| Number of patients admitted to the ICU          | 1,643,846  | [31, 37]  |



|                                                                                    |            |      |
|------------------------------------------------------------------------------------|------------|------|
| Number of hospitalizations due to COVID-19                                         | 396,355    | [34] |
| Average length of stay for general ward patients                                   | 4.6 days   | [32] |
| Average length of stay for patients admitted to the ICU                            | 3.3 days   | [32] |
| Median length of stay for non-ICU COVID-19 patients                                | 10.1 days  | [34] |
| Median length of stay for COVID-19 patients admitted to the ICU                    | 10.5 days  | [34] |
| Number of respirators required per day for interactions with general ward patients | 8          | [21] |
| Number of respirators required per day for interactions with ICU patients          | 14 (12-16) | [21] |

**Table 3 HCW-specific parameters used to estimate number of respirators required by the one respirator per patient encounter strategy**

| Parameter                                               | Total     | Number of workers w/<br>patient contact | Number of workers w/o<br>patient contact | Reference |
|---------------------------------------------------------|-----------|-----------------------------------------|------------------------------------------|-----------|
| Number of nursing home workers                          | 3,427,000 | 856,750                                 | 2,570,250                                | [21]      |
| Number of emergency medicine service workers            | 297,000   | 267,300                                 | 29,700                                   | [21]      |
| Number of emergency department workers                  | 132,000   | 132,000                                 | 0                                        | [21]      |
| Number of hospital workers                              | 6,053,000 | 1,997,490                               | 4,055,510                                | [21]      |
| Number of outpatient workers                            | 3,206,000 | 2,148,020                               | 1,057,980                                | [21]      |
| Number of other healthcare workers in other occupations | 6,000,000 | 0                                       | 6,000,000                                | [21, 22]  |

We then used these results to infer estimates for extended use and reuse of respirators enabled by the alternate respirator strategies. For our one disposable respirator per HCW per day strategy, we assumed that each HCW (with or without patient contact) would use one, new respirator per day.

For the daily H<sub>2</sub>O<sub>2</sub> vapor decontamination strategy, using currently available data on respirator integrity and efficiency after multiple cycles of H<sub>2</sub>O<sub>2</sub> vapor decontamination, we assumed that a respirator could be decontaminated for up to 20 cycles, with a 30% discard rate per day due to damaged or visibly soiled respirators after each cycle of decontamination.[30] Therefore, to form our estimates for H<sub>2</sub>O<sub>2</sub> vapor decontamination-enabled extended use of respirators, we divided the one respirator per HCW worker per day usage estimates by 20 and assumed 30% of respirators would need to be replaced after each decontamination cycle/per day to account for the estimated discard rate.

To model usage estimates for extended use of respirators enabled by daily UVGI decontamination, we used currently available data on respirator integrity and efficiency after multiple cycles of UVGI. Based on these estimates, we assumed that a respirator could be decontaminated for up to 5 cycles.[38] Therefore, to form our estimates for UVGI-enabled extended use of respirators, we divided the one respirator per healthcare worker per day usage estimates by 5 and assumed 30% of respirators would need to be replaced after each decontamination cycle/per day due to the estimated discard rate.[30, 39, 40]

For the reusable respirators with disposable or H<sub>2</sub>O<sub>2</sub> vapor-decontaminated filter strategies, we assumed that every healthcare worker in the US will use one reusable respirator and replace or decontaminate the filters daily. Based on a recently published low-cost reusable respirator, we estimated costs and waste from a pair of filters to be approximately 2/5 of the cost and waste generated from an N95 respirator.[10] If filters were to be decontaminated using H<sub>2</sub>O<sub>2</sub> vapor, we also assumed that filters could be reused for a maximum of 20 days (20 decontamination cycles).

#### *Cost estimate*

To estimate the cost accumulated by each usage method, we used the following costs, which were found in the literature and converted to 2020 US dollars: 3M respirator, \$0.86, multiplied by the number of respirators

required;<sup>[26]</sup> one surgical mask, \$0.15, multiplied by the number of surgical masks required;<sup>[26]</sup> reusable respirator, \$6.11, multiplied by the number of reusable respirators required;<sup>[10]</sup> a pair of filters for reusable respirators, \$0.34, multiplied by the number of pairs of filters required; and nationally distributed H<sub>2</sub>O<sub>2</sub> vapor decontamination systems across 60 sites, \$415 million.<sup>[6]</sup> We assumed the base cost of the UVGI system to only include the cost of the respirators required, as many hospitals are already equipped with UV systems that could be repurposed for respirator decontamination.<sup>[41]</sup> However, we also performed a sensitivity analysis to account for the varying costs and sophistication of UVGI systems, ranging from the installation of a brand new, high volume system to a less expensive, lower volume system that utilizes repurposed materials.<sup>[9, 41]</sup> Supplementary Table 1 explores a range of UVGI system costs which do not include installation, maintenance, distribution, energy, or personnel costs.<sup>[9, 11, 38, 41, 42]</sup>

#### *Waste estimate*

Waste estimates for each usage method measured the mass of the total respirators, surgical masks, and filters used and disposed of through the 6-month duration. The mass of 3M's 1860 respirator, a standard surgical mask, and a reusable respirator are 11.33 grams, 6.35 grams and 46.5 grams, respectively.<sup>[10, 24, 25]</sup> Single filters for reusable respirators were estimated using  $\frac{1}{4}$  of a respirator (2.26 grams per a single filter, 4.53 grams per pair of filters).<sup>[10]</sup> Thus, to form our waste estimates, we multiplied respirator, surgical mask and reusable respirator usage by their respective masses.

#### *Patient and Public Involvement*

Patients or the public were not involved in the design, or conduct, or reporting, or dissemination plans of our research. It was not appropriate or possible to involve patients or the public in the design, or conduct, or reporting, or dissemination plans of our research.

## **Results**

#### *Mask usage*

The estimated numbers of respirators required in the United States for each strategy are shown in Table 4 and Figure 1A. The use of a new respirator per patient encounter in the U.S. would require 7.41 billion respirators. An extended-use strategy of one respirator per day per HCW would reduce need by over 50% to 3.29 billion respirators. Decontamination by UVGI would further reduce the need to 1.64 billion respirators. Employing a H<sub>2</sub>O<sub>2</sub> vapor decontamination strategy would further reduce need by 84% to only 1.15 billion respirators. A reusable respirator strategy (with either disposable or decontaminated filters), where one respirator is assigned to each HCW for the duration of the pandemic, would further reduce need to approximately 18 million respirators, for a total reduction in respirator need by over 99%. Using a new surgical mask daily would require 3.29 billion surgical masks.

#### *Cost estimate*

The estimated costs for each respirator use strategy are summarized in Table 4 and Figure 1B. The use of a new respirator per patient per HCW would cost an average of \$6.38 billion. Extended use of one respirator per day would reduce the cost to \$2.83 billion, saving approximately \$3.55 billion. The decontamination by UVGI strategy would reduce the cost to \$1.41 billion, saving an additional \$1.42 billion. An H<sub>2</sub>O<sub>2</sub> vapor decontamination strategy would be comparable to the cost of UVGI at \$1.40 billion. A reusable respirator with disposable filters would cost \$1.24 billion, though this is almost entirely filter costs (\$1.13 billion). A reusable respirator with a decontaminated filter and surgical mask strategies would be the least costly strategies at \$581 million dollars and \$493 million dollars, respectively, which is a total cost savings of over \$5.79 billion (Figure 1B). This is more than the amount of money provided by the CARES Act to support the CDC's pandemic response efforts and programs.<sup>[43]</sup>

#### *Waste estimate*

The estimated waste generated by each respirator use strategy is summarized in Table 4 and Figure 1C-D. The use of a new respirator per patient encounter per HCW would generate 84.0 million kg of waste. Extended use of one respirator per day would reduce waste to 37.22 million kg. The decontamination by UVGI strategy would reduce waste to 18.61 million kg. A H<sub>2</sub>O<sub>2</sub> vapor decontamination (with a 30% discard rate) strategy would reduce waste to 13.03 million kg. A reusable respirator with disposable filters would generate 15.73 million kg of waste (14.88 million kg from filters). Pairing the reusable respirator with a decontaminated filter would significantly reduce generated waste to 1.58 million kg, for an overall reduction in waste generation by roughly 82.42 million kg,

equivalent to going from a mass of 252 Boeing 747 airplanes to five (Figure 1D). The surgical mask strategy would generate 20.86 million kg of waste.

Cost and waste estimates for commercially available reusable half-facepiece elastomeric respirators (3M 7500 series) with P100 filters (assuming that each HCW uses one pair of filters per week) were also explored (Supplementary Table 2).[24, 25, 44] Low and high cost estimates of \$2.02 and \$2.26 billion were calculated using sources from the commercial manufacturer 3M,[24] with reusable respirator costs ranging from \$25 to \$45 per respirator with a single disposable P100 filter cost of \$7.00.[24, 25] These cost estimates of \$2.02-\$2.26 billion were lower than the one respirator per day reuse strategy, but higher than the H<sub>2</sub>O<sub>2</sub> decontamination, UVGI decontamination, reusable respirator, reusable respirator with decontaminated filters, and surgical mask strategies (Table 4, Supplementary Table 2). Low and high waste estimates of 3.22 million kg and 3.59 million kg were calculated using a respirator weight of 135 grams and filter weight of 4.54 grams (Supplementary Table 2). These waste estimates were lower than the one per day reuse strategy, H<sub>2</sub>O<sub>2</sub> decontamination, UVGI, reusable respirator, and surgical mask strategies, but higher than the reusable respirator with decontaminated filters strategy (Table 4, Supplementary Table 2).

**Table 4 Numbers of respirators, cost accumulated, and waste generated per strategy over a duration of 6-months**

| Respirator strategy                                           | Number of respirators required            | Cost accumulated (USD)        | Waste generated (kg)        |
|---------------------------------------------------------------|-------------------------------------------|-------------------------------|-----------------------------|
| 1 per patient encounter                                       | 7.41 (7.22-7.59) billion                  | \$6.38 (6.21-6.52) billion    | 84.0 (81.79-85.96) million  |
| 1 per day                                                     | 3.29 (3.10-3.47) billion                  | \$2.83 (2.67-2.98) billion    | 37.22 (35.15-39.29) million |
| UVGI-decontaminated respirator                                | 1.64 (1.55-1.73) billion                  | \$1.41 (1.33-1.49) billion    | 18.61 (17.58-19.64) million |
| H <sub>2</sub> O <sub>2</sub> -decontaminated N95 respirators | 1.15 (1.09-1.21) billion                  | \$1.40 (1.35-1.46) billion    | 13.03 (12.30-13.75) million |
| Reusable respirator + disposable filters                      | 0.018 (0.017-0.019) billion               | \$1.24 (1.17-1.31) billion    | 15.73 (14.85-16.60) million |
| Reusable respirator + decontaminated filters                  | 0.018 (0.017-0.019) billion               | \$0.581 (0.572-0.591) billion | 1.58 (1.49-1.67) million    |
| Surgical mask, 1 per day                                      | 3.29 (3.10-3.47) billion (surgical masks) | \$0.493 (0.465-0.520) billion | 20.86 (19.70-22.02) million |

## Discussion

### *Principal Findings*

The COVID-19 pandemic has dramatically increased the demand for respirators across the world, leading to supply shortages, spending in the billions of dollars, and generation of large amounts of medical waste. Even after the successful release of an FDA approved vaccine, masks will likely continue to be required due to factors such as variable vaccine uptake, incomplete vaccinations, lack of knowledge as to who has received a vaccine, the possibility of reinfection, and unclear duration of vaccination efficacy.[45, 46] Additionally, even after the pandemic, respirator and mask usage both in healthcare settings and among the general public may persist. The continued use of disposable respirators and masks is unlikely to be sustainable and will have significant environmental consequences. With this in mind, it is critical to understand the best strategy to maximize respirator and mask availability while minimizing costs and waste generation.

Of the strategies compared, we find that all reuse strategies (UVGI decontamination, H<sub>2</sub>O<sub>2</sub> vapor decontamination, reusable respirators with disposable filters, or reusable respirators with decontaminated filters), could significantly decrease the number of respirators required compared to single- or extended-use mask strategies by at least 1.65 billion respirators in the United States alone. This would greatly increase availability and access of respirators worldwide. In addition, reuse strategies could save at least \$1.42 billion dollars in costs nationally over the course of the pandemic. Finally, reuse strategies significantly reduce waste generation in the United States by at least 18.61 million kg. These estimates from our study only capture the economic and environmental impact over the first six months of the COVID-19 pandemic in the US and suggest that the long-term and global impact of reuse strategies are even higher, especially when considering respirators and masks used by the general population.

1  
2  
3 Our analyses found that while UVGI and H<sub>2</sub>O<sub>2</sub> vapor decontamination required more respirators overall compared  
4 to the reusable respirator with disposable filters, they were less costly and generated less waste as they did not  
5 require the use of disposable filters. Combining the strategies by utilizing a reusable respirator with either UVGI- or  
6 H<sub>2</sub>O<sub>2</sub> vapor-decontaminated filters was the least costly of all strategies compared and generated the least amount of  
7 waste. This finding suggests that even with UVGI and H<sub>2</sub>O<sub>2</sub> vapor decontamination strategies, the adoption of a  
8 reusable respirator can have a significant impact in both cost and waste generation. Our findings support a  
9 combination of UVGI or H<sub>2</sub>O<sub>2</sub> vapor and reusable respirator strategy to provide respirators in healthcare settings.

### 10 *Limitations of the study*

11 In settings where UVGI or H<sub>2</sub>O<sub>2</sub> vapor decontamination are not feasible, such as in resource-constrained settings  
12 where installation and maintenance of such systems are challenging, reusable respirators with disposable filters may  
13 be preferable to disposable respirators. These respirators may also be decontaminated with standard hospital  
14 equipment such as alcohol and bleach wipes, which may be more readily available in settings with limited  
15 resources.[10, 12] Anticipatory investment in a reusable respirator may not only provide access to high-quality PPE  
16 for COVID-19 in such settings but reduce overall waste and injury to our environment. Development of  
17 technologies to facilitate decontamination of respirators and/or filters that do not require special equipment, training,  
18 or infrastructure could even further reduce costs and waste as in the reusable respirator with decontaminated filters  
19 strategy.  
20

21 Our study had several limitations. We estimated only a few respirator strategies, and other methods for extended  
22 respirator use and reuse across the world were not captured in our analysis. Furthermore, our estimates were  
23 performed from a US perspective, and these numbers will be different for other countries depending on parameters  
24 such as number of healthcare workers, rates of infection, and number of hospitalized patients, though we suspect  
25 that the relative benefit of reuse strategies compared to single- or extended-use respirator strategies will persist.  
26 Additionally, our cost estimates did not include installation, maintenance, distribution, or personnel costs associated  
27 with various strategies. Furthermore, our analysis measured only the waste generated by masks themselves and did  
28 not study the environmental impact of manufacturing or decontamination processes, which should be further  
29 investigated. Finally, our estimates for the reusable respirator strategy was based on a recently published  
30 prototype.[10] Updated analyses should be performed as these and other low-cost reusable respirators and masks  
31 become more available.[12, 47]  
32

33 While our analysis measured the economic and environmental impact of several mask reuse strategies, there are  
34 several areas of investigation that may contribute to further reductions in cost and environmental impact. For  
35 example, our analysis highlighted the importance of considering not only reusable respirators, but reusable or  
36 decontaminatable filters, as these drove the cost and waste of reusable respirator/disposable filter strategies.  
37 Inexpensive, low-tech methods for filter decontamination are needed. Alternatively, redesign of reusable respirators  
38 to require smaller filters or development of fully reusable respirators would greatly reduce cost and waste.  
39 Additionally, the development of novel materials for masks to increase durability of these systems after repeated  
40 exposures to H<sub>2</sub>O<sub>2</sub> vapor or other decontamination techniques may increase the lifespan of masks and decrease the  
41 volume of masks used. Incorporation of bactericidal or antiviral agents into masks may also increase their reusability  
42 and potentially decrease the need for cleaning agents in regions where there may be concomitant shortages of these  
43 solutions. This strategy may also decrease waste of common hospital-based wipes used to decontaminate masks,  
44 which was not included in this analysis. Finally, the development of biodegradable or recyclable materials that  
45 provide efficient particle protection may minimize the environmental effects of discarded masks.  
46

### 47 *Conclusions*

48 In summary, respirator reuse technologies are critical to meet the supply demands imparted by COVID-19,  
49 especially in low-resource settings. This need is emphasized by the likelihood that respirators will continue to be  
50 commonly used after the release of a vaccine, as well as post-pandemic in certain populations. Furthermore, these  
51 technologies can save billions of dollars that can be redistributed toward other efforts to combat the pandemic and  
52 enable more sustainable use of respirators moving forward. Future development of low-cost, low-tech technologies  
53 to enable respirator and/or filter decontamination is needed to further minimize the economic and environmental  
54 costs of respirators.  
55  
56  
57  
58  
59  
60

### What is already known on this topic

-We searched the existing peer-reviewed literature using Google Scholar, PubMed, Scopus and Elsevier. As of November 2020, we found several studies supporting the widespread use of masks as an effective method of protection for healthcare workers against COVID-19. The use of face masks can prevent particle emissions by more than 90% and studies have shown that they significantly reduce risk of infection. Additionally, face masks provide critical protection for frontline healthcare workers who are at a greater risk of becoming infected with COVID-19.

-The high-demand for masks as a result of universal masking as a protective measure against COVID-19 has led to global mask shortages, particularly of N95 respirators. This has required many healthcare workers to strategically reuse and disinfect their disposable respirators over prolonged periods of time. Different extended mask-use strategies of surgical masks and N95 respirators have been compared in the literature, yet more recent developments such as ultraviolet germicidal irradiation, hydrogen peroxide vapor decontamination, and low-cost reusable masks require further evaluation.

-Studies on the economic and environmental impacts of the drastic surge in PPE and mask usage as a result of the COVID-19 pandemic are limited, with estimates showing up to 7,200 tons of generated medical waste per day. This is especially important as the use of face masks will likely be required globally for a prolonged period of time even after the successful release of a vaccine.

### What this study adds

-To our knowledge, this study is one of the first to assess the economic and environmental impact of different respirator reuse strategies to accommodate widespread respirator use among healthcare workers on a national scale in the United States.

-Cost and waste estimations are specific to respirator use in order to meet the demands of the COVID-19 pandemic. Potential cost and waste reductions as a result of reuse strategies, which include more recently developed technologies such as ultraviolet germicidal irradiation, hydrogen peroxide vapor decontamination, and reusable respirators were explored.

-We hope that this study will provide evidence to inform an optimal respirator reuse strategy to reduce the economic and environmental toll during the COVID-19 pandemic.

### Footnotes

**Contributors:** JNC, OG, JC, CH, and GT conceived and designed the analysis. JB, AW, PRC, and FD contributed data. JNC, OG, and JC collected data and performed the analysis. JNC, OG, JC, and GT wrote the manuscript. JNC, OG, JC, JB, AW, PRC, FD, CH, and GT interpreted the data and reviewed and approved the manuscript. The corresponding author, GT, provided supervision over the study and is the guarantor. GT confirms that all authors meet the authorship criteria and no contributing authors have been omitted.

**Funding:** JNC: 5T32DK007191; OG: MIT Undergraduate Research Opportunities Program; PC: NIH K23DA044874, R44DA051106

**Competing interests:** The authors declare the following competing financial interest(s): AJW, JDB, and GT have filed multiple patents surrounding the respirator and sensors. In addition, AJW, JDB and GT have a financial interest in TEAL Bio, a biotechnology company focused on developing the next generation of personal protective equipment. JNC, PRC, OG, JC, FD, and CH declare no competing interests.

**Data Sharing:** All data is included in the manuscript and/or supplementary materials, no additional data is available.

GT provides attestation that this study reflects honest and accurate data and transparent disclosure of all relevant information. Nothing has been omitted or withheld from this study.

**Fig. 1** Comparison of the following per respirator reuse strategy: A) number of respirators or surgical masks used, B) costs in billions of USD, C) waste generated in millions of kg, D) waste generated per strategy in the equivalent number of 747 airplanes by mass (mass of one 747 airplane, 333,000 kg).

## References

1. Ranney ML, Griffeth V, Jha AK. Critical Supply Shortages — The Need for Ventilators and Personal Protective Equipment during the Covid-19 Pandemic. *N Engl J Med*2020;382(18):e41-e.
2. Remuzzi A, Remuzzi G. COVID-19 and Italy: what next? *Lancet*2020;395(10231):1225-8.
3. Livingston E, Desai A, Berkwits M. Sourcing Personal Protective Equipment During the COVID-19 Pandemic. *JAMA*2020;323(19):1912-4.
4. Garcia Godoy LR, Jones AE, Anderson TN, et al. Facial protection for healthcare workers during pandemics: a scoping review. *BMJ Glob Health*2020;5(5):e002553.
5. Rubio-Romero JC, Pardo-Ferreira MdC, Torrecilla-Garcia JA, et al. Disposable masks: Disinfection and sterilization for reuse, and non-certified manufacturing, in the face of shortages during the COVID-19 pandemic. *Safe Sci*2020;129:104830-.
6. Books B. Final Report for the Bioquell Hydrogen Peroxide Vapor (HPV) Decontamination for Reuse of N95 Respirators: *Batelle*2016; <https://www.fda.gov/media/136386/download>.
7. Batelle. Batelle CCDS FAQ. 2020. <https://www.battelle.org/inb/battelle-ccds-for-covid19-satellite-locations> (accessed March 2020).
8. Fisher EM, Shaffer RE. Considerations for Recommending Extended Use and Limited Reuse of Filtering Facepiece Respirators in Health Care Settings. *J Occup Environ Hyg*2014;11(8):D115-D28.
9. Gilbert RM, Donzanti MJ, Minahan DJ, et al. Mask Reuse in the COVID-19 Pandemic: Creating an Inexpensive and Scalable Ultraviolet System for Filtering Facepiece Respirator Decontamination. *Glob Health Sci Pract*2020;8(3):582-95.
10. Byrne JD, Wentworth AJ, Chai PR, et al. Injection Molded Autoclavable, Scalable, Conformable (iMASC) system for aerosol-based protection: a prospective single-arm feasibility study. *BMJ*2020;10(7):e039120-e.
11. Lowe JL, Paladino KD, Farke JD, et al. N95 Filtering Facepiece Respirator Ultraviolet Germicidal Irradiation (UVGI) Process for Decontamination and Reuse. *Nebraska Medicine*2020. <https://www.nebraskamed.com/sites/default/files/documents/covid-19/n-95-decon-process.pdf> (accessed September 2020).
12. Kroo L, Kothari A, Hannebelle M, et al. Pneumask: Modified Full-Face Snorkel Masks as Reusable Personal Protective Equipment for Hospital Personnel. *MedRxiv* 2020.04.24.20078907 [Preprint]. April 2020; <https://doi.org/10.1101/2020.04.24.20078907>.
13. Pneumask: Modified Full-Face Snorkel Masks as Reusable Personal Protective Equipment for Hospital Personnel. *Resp Ther Wk*. 2020:358.
14. Chhabria P. Coronavirus: The masks you throw away could end up killing a whale: *BBC*. 7 July 2020. <https://www.bbc.com/news/av/science-environment-53287940> (accessed September 2020).
15. Klemeš JJ, Fan YV, Tan RR, et al. Minimising the present and future plastic waste, energy and environmental footprints related to COVID-19. *Renew & Sust Energ Rev*2020;127:109883-.
16. Jennings R. COVID-19 Pandemic: How Cultural Differences Help Asian Countries Beat COVID-19, While US Struggles Voice of America. 2020. <https://www.voanews.com/covid-19-pandemic/how-cultural-differences-help-asian-countries-beat-covid-19-while-us-struggles> (accessed September 2020).
17. Leung H. Why Wearing a Face Mask Is Encouraged in Asia, but Shunned in the U.S. *TIME*. March 2020. <https://time.com/5799964/coronavirus-face-mask-asia-us/> (accessed April 2020).
18. Burgess A, Horii M. Risk, ritual and health responsabilisation: Japan's 'safety blanket' of surgical face mask-wearing. *Sociol Health Illn*2012;34(8):1184-98.

19. Konyn C. 6 July 2020. Another Side Effect of COVID-19: The Surge in Plastic Pollution. *Earth*. <https://earth.org/covid-19-surge-in-plastic-pollution/> (accessed March 2020).
20. Bureau USC. U.S. Population 2019. 2020. [https://www.census.gov/glossary/#term\\_Populationestimates](https://www.census.gov/glossary/#term_Populationestimates) (accessed April 2020).
21. Carias C, Rainisch G, Shankar M, et al. Potential demand for respirators and surgical masks during a hypothetical influenza pandemic in the United States. *Clin Infect Dis*2015;60 Suppl 1(suppl\_1):S42-S51.
22. CDC. Healthcare Workers The National Institute for Occupational Safety and Health (NIOSH) CDC. 2017. <https://www.cdc.gov/niosh/topics/healthcare/default.html>.
23. Foundation KF. Total Healthcare Employment. May 2018. <https://www.kff.org/other/state-indicator/total-health-care-employment/?currentTimeframe=0&sortModel=%7B%22colId%22:%22Location%22,%22sort%22:%22sc%22%7D> (accessed August 2020).
24. 3M. 3M™ Half Facepiece Respirator Assembly 6291/07002(AAD), Medium, with 3M™ Particulate Filters 2091/07000(AAD), P100 24 EA/Case Products. 2020. [https://www.3m.com/3M/en\\_US/company-us/all-3m-products/~/3M-Half-Facepiece-Respirator-Assembly-6291-07002-AAD-Medium-with-3M-Particulate-Filters-2091-07000-AAD-P100-24-EA-Case/](https://www.3m.com/3M/en_US/company-us/all-3m-products/~/3M-Half-Facepiece-Respirator-Assembly-6291-07002-AAD-Medium-with-3M-Particulate-Filters-2091-07000-AAD-P100-24-EA-Case/) (accessed July 2020).
25. MSC Direct. 3M Qty 1 Pack Magenta P100 Filter Protects Against Particulates, Series 2000. 2020. <https://www.mscdirect.com/product/details/00325696> (accessed July 2020).
26. Mukerji S, MacIntyre CR, Seale H, et al. Cost-effectiveness analysis of N95 respirators and medical masks to protect healthcare workers in China from respiratory infections. *BMC Inf Dis*2017;17(1):464-.
27. Asadi S, Cappa CD, Barreda S, et al. Efficacy of masks and face coverings in controlling outward aerosol particle emission from expiratory activities. *Sci Rep*2020;10(1):15665-.
28. Silverman JD, Hupert N, Washburne AD. Using influenza surveillance networks to estimate state-specific prevalence of SARS-CoV-2 in the United States. *Sci Trans Med*2020;12(554):eabc1126.
29. Gostin LO, Cohen IG, Koplan JP. Universal Masking in the United States: The Role of Mandates, Health Education, and the CDC. *JAMA*2020;324(9):837-8.
30. Czubyrt MP, Stecy T, Popke E, et al. N95 mask reuse in a major urban hospital: COVID-19 response process and procedure. *Journal Hospital Infect*2020;106(2):277-82.
31. UCSF Philip R. Lee Institute for Health Policy Studies. ICU Outcomes.2020. <https://healthpolicy.ucsf.edu/icu-outcomes> (accessed August 2020).
32. Agency for Healthcare Research and Quality. Overview of U.S. Hospital Stays in 2016: Variation by Geographic Region. 2018. <https://www.hcup-us.ahrq.gov/reports/statbriefs/sb246-Geographic-Variation-Hospital-Stays.jsp> (accessed August 2020).
33. Hunter A, Johnson L, Coustasse A. Reduction of Intensive Care Unit Length of Stay: The Case of Early Mobilization. *Health Care Manag*2020;39(3):109-16.
34. Incidence, clinical outcomes, and transmission dynamics of severe coronavirus disease 2019 in California and Washington: prospective cohort study. *BMJ*. 2020;369:m2205-m.
35. Project TCT. National Hospitalization.2020. <https://covidtracking.com/data/national/hospitalization> (accessed Aug 2020).
36. Bartsch SM, Ferguson MC, McKinnell JA, et al. The Potential Health Care Costs And Resource Use Associated With COVID-19 In The United States. *Health Aff (Proj Hope)*2020;39(6):101377hlthaff202000426-935C.
37. Association AH. Fast Facts on U.S. Hospitals. 2020. <https://www.aha.org/statistics/fast-facts-us-hospitals> (accessed Aug 2020).
38. O'Hearn K, Gertsman S, Sampson M, et al. Decontaminating N95 and SN95 masks with ultraviolet germicidal irradiation does not impair mask efficacy and safety. *J Hosp Infect*2020;106(1):163-75.
39. Brickman J, Scott C, Courtad C, et al. Optimization, Validation, and Implementation of a UV Disinfection Method for N95 Face Masks. University of Chicago. 2020. <https://static1.squarespace.com/> (accessed August 2020).
40. Liao L, Xiao W, Zhao M, et al. Can N95 Respirators Be Reused after Disinfection? How Many Times? *ACS Nano*2020;14(5):6348-56.
41. Ou Q, Pei C, Chan Kim S, et al. Evaluation of decontamination methods for commercial and alternative respirator and mask materials – view from filtration aspect. *J Aerosol Sci*2020;150:105609-.
42. de Robles D, Kramer SW. Improving Indoor Air Quality through the Use of Ultraviolet Technology in Commercial Buildings. *Proc Eng*. 2017;196:888-94.

- 1  
2  
3 43. Snell K. What's Inside The Senate's \$2 Trillion Coronavirus Aid Package. March 2020. *NPR*  
4 <https://www.npr.org/2020/03/26/821457551/whats-inside-the-senate-s-2-trillion-coronavirus-aid-package> (accessed  
5 April 2020).
- 6 44. Chalikonda S, Waltenbaugh H, Angelilli S, et al. Implementation of an Elastomeric Mask Program as a  
7 Strategy to Eliminate Disposable N95 Mask Use and Resterilization: Results from a Large Academic Medical  
8 Center. *J Am Coll Surg*. 2020;231(3):333-8.
- 9 45. Kortepeter M. Why You'll Still Need To Wear A Mask Even After Covid-19 Vaccines Arrive 2020.  
10 *Forbes* [updated October 20]. 2020. <https://www.forbes.com/sites/coronavirusfrontlines/2020/10/20/why-youll-still-need-to-wear-a-mask-even-after-covid-19-vaccines-arrive/?sh=600022ab5a42> (Oct 2020).
- 11 46. Dr. Fauci says masks, social distancing will still be needed after a Covid-19 vaccine—here's why  
12 *CNBC*2020 [updated November 16]. [https://www.cnbc.com/2020/11/16/fauci-why-still-need-masks-social-](https://www.cnbc.com/2020/11/16/fauci-why-still-need-masks-social-distancing-after-covid-19-vaccine.html)  
13 [distancing-after-covid-19-vaccine.html](https://www.cnbc.com/2020/11/16/fauci-why-still-need-masks-social-distancing-after-covid-19-vaccine.html) (Accessed Oct 2020).
- 14 47. Researchers Develop Rapid Deployment Mask University of Maryland. 2020.  
15 <https://fischellinstitute.umd.edu/news/story/researchers-develop-rapid-deployment-mask> (accessed May 2020).  
16  
17  
18  
19  
20  
21  
22  
23  
24  
25  
26  
27  
28  
29  
30  
31  
32  
33  
34  
35  
36  
37  
38  
39  
40  
41  
42  
43  
44  
45  
46  
47  
48  
49  
50  
51  
52  
53  
54  
55  
56  
57  
58  
59  
60



# Respirator and surgical mask use per strategy (billions)

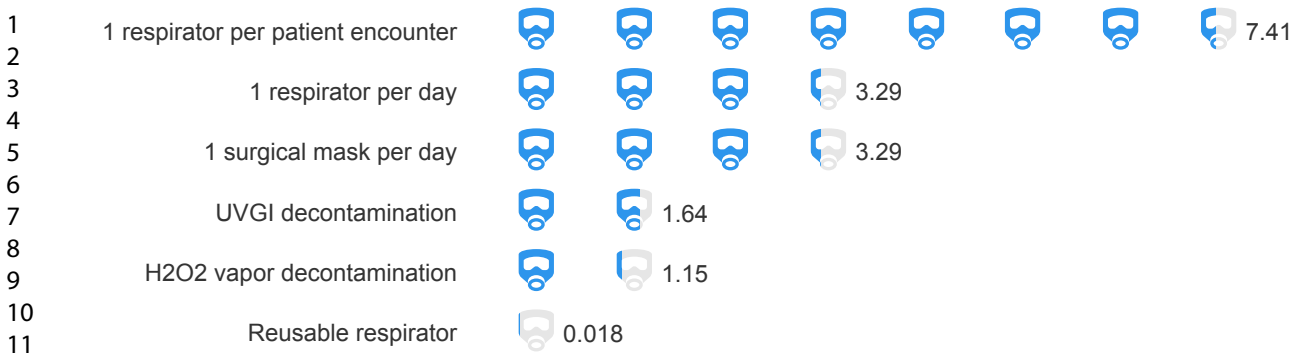

# Cost per strategy (billions, USD)

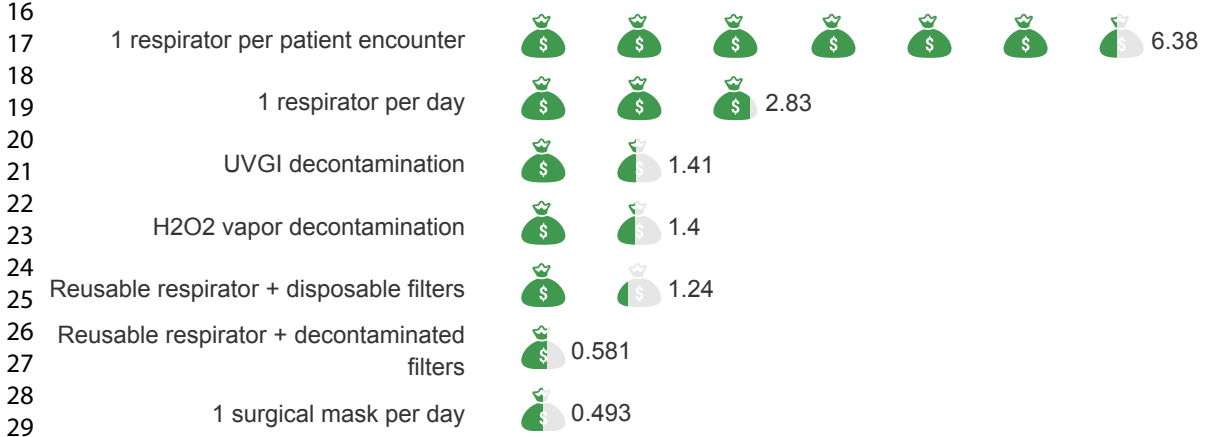

# Waste per strategy (millions, kg)

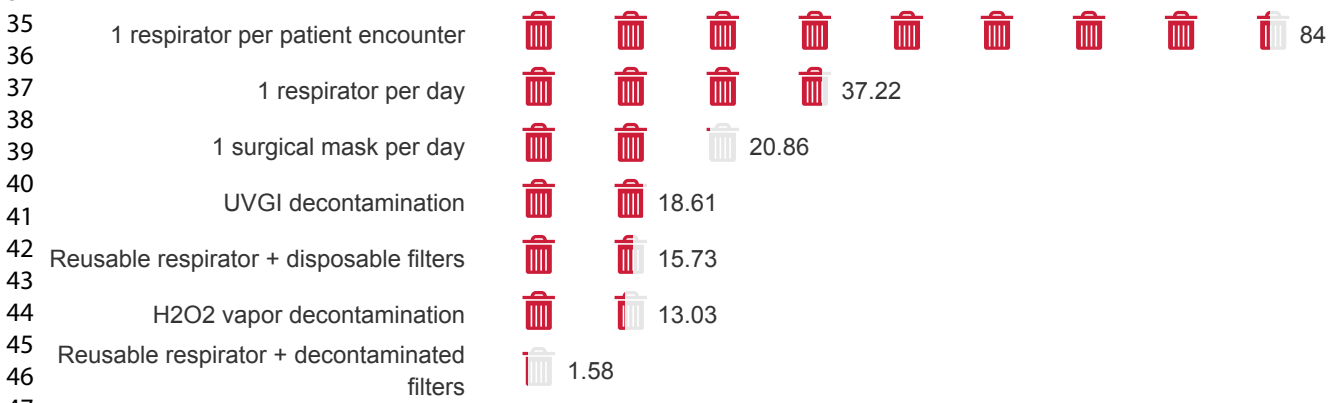

# Waste per strategy in number of 747 airplanes

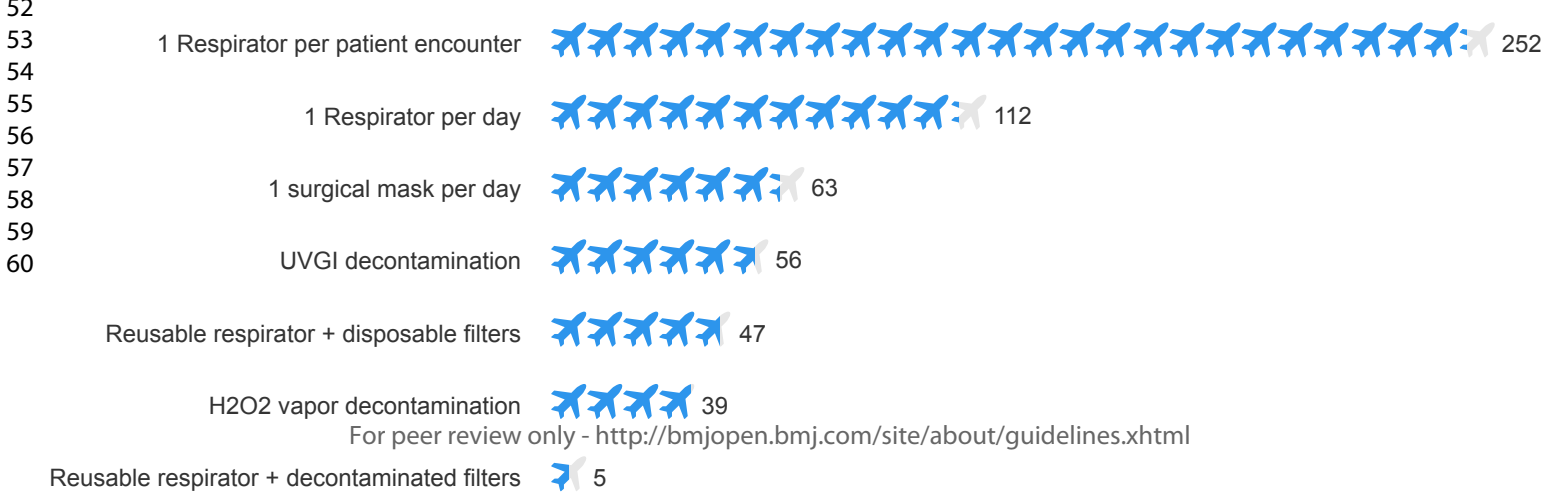

**Supplementary Table 1 Sensitivity analysis of UVGI decontamination cost\***

| Parameter                                                       | Value                      |
|-----------------------------------------------------------------|----------------------------|
| Cost of 2 surgical suite UVGI system                            | \$40,000.00 <sup>11</sup>  |
| Cost of repurposed or low tech UVGI lamp system                 | \$50.00 <sup>9</sup>       |
| <b>Results</b>                                                  |                            |
| Base cost                                                       | \$1.41 (1.33-1.49) billion |
| Base cost + cost of 2 surgical suite UVGI systems               | \$1.42 (1.34-1.49) billion |
| Base cost + cost of repurposed or low tech UVGI lamp system     | \$1.41 (1.33-1.49) billion |
| *Assuming distribution across hypothetical 60 sites across U.S. |                            |

**Supplementary Table 2 Reusable elastomeric respirator + disposable p100 filter usage, cost and waste sensitivity analysis**

| Parameter                               | Value                      |
|-----------------------------------------|----------------------------|
| Respirator Usage                        | 18 (17-19) million         |
| Filter Usage (by pair)                  | 108 (102-114) million      |
| <b>Results</b>                          |                            |
| Reusable respirator + filter cost (USD) | \$2.14 (2.02-2.26) billion |
| Reusable respirator + filter waste (kg) | 3.41 (3.22-3.59) million   |

# BMJ Open

## Thinking green: Modelling respirator reuse strategies to reduce cost and waste

|                                 |                                                                                                                                                                                                                                                                                                                                                                                                                                                                                                                                                                                                                                                                                                                                                                                                                                                        |
|---------------------------------|--------------------------------------------------------------------------------------------------------------------------------------------------------------------------------------------------------------------------------------------------------------------------------------------------------------------------------------------------------------------------------------------------------------------------------------------------------------------------------------------------------------------------------------------------------------------------------------------------------------------------------------------------------------------------------------------------------------------------------------------------------------------------------------------------------------------------------------------------------|
| Journal:                        | <i>BMJ Open</i>                                                                                                                                                                                                                                                                                                                                                                                                                                                                                                                                                                                                                                                                                                                                                                                                                                        |
| Manuscript ID                   | bmjopen-2021-048687.R1                                                                                                                                                                                                                                                                                                                                                                                                                                                                                                                                                                                                                                                                                                                                                                                                                                 |
| Article Type:                   | Original research                                                                                                                                                                                                                                                                                                                                                                                                                                                                                                                                                                                                                                                                                                                                                                                                                                      |
| Date Submitted by the Author:   | 07-Apr-2021                                                                                                                                                                                                                                                                                                                                                                                                                                                                                                                                                                                                                                                                                                                                                                                                                                            |
| Complete List of Authors:       | <p>Chu, Jacqueline; Massachusetts General Hospital, Division of Gastroenterology, Department of Medicine; Massachusetts Institute of Technology<br/> Ghenand, Omkar; Massachusetts Institute of Technology<br/> Collins, Joy; Brigham and Women's Hospital; Massachusetts Institute of Technology<br/> Byrne, James; Brigham and Women's Hospital<br/> Wentworth, Adam; Massachusetts Institute of Technology; Brigham and Women's Hospital<br/> Chai, Peter; Massachusetts Institute of Technology Koch Institute for Integrative Cancer Research; Brigham and Women's Hospital<br/> Dadabhoy, Farah; Brigham and Women's Hospital; Massachusetts Institute of Technology<br/> Hur, Chin; Columbia University Medical Center<br/> Traverso, Giovanni; Brigham and Women's Hospital; Massachusetts Institute of Technology, Mechanical Engineering</p> |
| <b>Primary Subject Heading</b>: | Health economics                                                                                                                                                                                                                                                                                                                                                                                                                                                                                                                                                                                                                                                                                                                                                                                                                                       |
| Secondary Subject Heading:      | Health policy, Health services research, Infectious diseases, Public health                                                                                                                                                                                                                                                                                                                                                                                                                                                                                                                                                                                                                                                                                                                                                                            |
| Keywords:                       | COVID-19, Health economics < HEALTH SERVICES ADMINISTRATION & MANAGEMENT, HEALTH SERVICES ADMINISTRATION & MANAGEMENT, INFECTIOUS DISEASES                                                                                                                                                                                                                                                                                                                                                                                                                                                                                                                                                                                                                                                                                                             |
|                                 |                                                                                                                                                                                                                                                                                                                                                                                                                                                                                                                                                                                                                                                                                                                                                                                                                                                        |

SCHOLARONE™  
Manuscripts

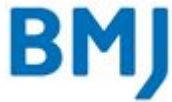

I, the Submitting Author has the right to grant and does grant on behalf of all authors of the Work (as defined in the below author licence), an exclusive licence and/or a non-exclusive licence for contributions from authors who are: i) UK Crown employees; ii) where BMJ has agreed a CC-BY licence shall apply, and/or iii) in accordance with the terms applicable for US Federal Government officers or employees acting as part of their official duties; on a worldwide, perpetual, irrevocable, royalty-free basis to BMJ Publishing Group Ltd ("BMJ") its licensees and where the relevant Journal is co-owned by BMJ to the co-owners of the Journal, to publish the Work in this journal and any other BMJ products and to exploit all rights, as set out in our [licence](#).

The Submitting Author accepts and understands that any supply made under these terms is made by BMJ to the Submitting Author unless you are acting as an employee on behalf of your employer or a postgraduate student of an affiliated institution which is paying any applicable article publishing charge ("APC") for Open Access articles. Where the Submitting Author wishes to make the Work available on an Open Access basis (and intends to pay the relevant APC), the terms of reuse of such Open Access shall be governed by a Creative Commons licence – details of these licences and which [Creative Commons](#) licence will apply to this Work are set out in our licence referred to above.

Other than as permitted in any relevant BMJ Author's Self Archiving Policies, I confirm this Work has not been accepted for publication elsewhere, is not being considered for publication elsewhere and does not duplicate material already published. I confirm all authors consent to publication of this Work and authorise the granting of this licence.

## Thinking green: Modelling respirator reuse strategies to reduce cost and waste

Jacqueline N. Chu, MD (1,2), Omkar Ghenand (3), Joy Collins, MPH (2,4), James Byrne, MD, PhD (2,5), Adam Wentworth, MS (2,4), Peter R Chai, MD MMS (2,6), Farah Dadabhoy, MD (2,6), Chin Hur, MD, MPH (7,8), Giovanni Traverso, MB, BChir, PhD\* (4,9)

\*1 Division of Gastroenterology, Massachusetts General Hospital, Harvard Medical School, Boston, MA 02114, USA. Correspondence to: [ctraverso@bwh.harvard.edu](mailto:ctraverso@bwh.harvard.edu), [cgt20@mit.edu](mailto:cgt20@mit.edu)

2 David H. Koch Institute for Integrative Cancer Research, Massachusetts Institute of Technology, Cambridge, MA 02142, USA

3 Massachusetts Institute of Technology, Cambridge, MA 02142, USA

4 Division of Gastroenterology, Brigham and Women's Hospital, Harvard Medical School, Boston, MA 02115, USA

5 Harvard Radiation Oncology Program, Boston, MA 02114, USA

6 Department of Emergency Medicine, Brigham and Women's Hospital

7 Department of Medicine, Columbia University Medical Center, New York, NY 10032, USA

8 Department of Epidemiology, Mailman School of Public Health and Herbert Irving Comprehensive Cancer Center, Columbia University Medical Center, New York, NY 10032, USA

9 Department of Mechanical Engineering, Massachusetts Institute of Technology, 77 Massachusetts Ave, Cambridge, MA 02139, USA

Word Count: 5,018

**Abstract:**

**Objectives** To compare the impact of respirator extended use and reuse strategies with regard to cost and sustainability during the COVID-19 pandemic.

**Design** Cost analysis

**Setting** United States

**Participants** All healthcare workers within the United States

**Interventions** Not applicable

**Main outcome measures** A model was developed to estimate usage, costs, and waste incurred by several respirator usage strategies over the first 6-months of the pandemic in the United States. This model assumed universal masking of all healthcare workers. Estimates were taken from the literature, government databases, and commercially available data from approved vendors.

**Results** A new N95 respirator per patient encounter would require 7.41 billion respirators, cost \$6.38 billion, and generate 84.0 million kg of waste in the U.S. over 6 months. One respirator per day per healthcare worker would require 3.29 billion respirators, \$2.83 billion, and 37.22 million kg of waste. Decontamination by ultraviolet germicidal irradiation would require 1.64 billion respirators, \$1.41 billion, and accumulate 18.61 million kg of waste. H<sub>2</sub>O<sub>2</sub> vapor decontamination would require 1.15 billion respirators, \$1.65 billion, and produce 13.03 million kg of waste. One reusable respirator with daily disposable filters would require 18 million respirators, cost \$1.24 billion, and generate 15.73 million kg of waste. Pairing a reusable respirator with H<sub>2</sub>O<sub>2</sub> vapor-decontaminatable filters would reduce cost to \$831 million and generate 1.58 million kg of waste. The use of one surgical mask per healthcare worker per day would require 3.29 billion masks, cost \$493 million, and generate 27.92 million kg of waste.

**Conclusions** Decontamination-and reusable respirator-based strategies decreased the number of respirators used, costs, and waste generated compared to single- or daily extended-use of disposable respirators. Future development of low-cost, low-tech technologies to enable respirator and/or filter decontamination is needed to further minimize the economic and environmental costs of masks.

**Trial registration** Not applicable

**Keywords** Covid-19, environmental health, health economics

**Strengths and limitations of this study**

- Describes the current economic and environmental impact of several mask reuse strategies on a national scale among healthcare workers.
- Estimates cost and waste specific to respirator use in order to meet the demands of COVID-19.
- Explores respirator reuse strategies to reduce the economic and environmental toll during COVID-19 and beyond.
- Only a few respirator strategies and decontamination methods are evaluated in this study.
- Conducted from a US perspective only; parameters are not applicable to other countries and did not include ancillary costs.

## Introduction

The COVID-19 pandemic has led to personal protective equipment (PPE) shortages worldwide, including shortage of N95 respirators and surgical masks.[1-3] In order to maximize resources, many hospitals have adopted extended use of masks or decontamination and reuse strategies, particularly of N95 respirators.[1 ,4 ,5] Prior to the pandemic, a new N95 respirator was typically used for each patient encounter and then discarded.[5 ,6] In light of the PPE shortage, some hospitals have now moved to using one respirator per several encounters or even several days.[4 ,6] Decontamination strategies such as hydrogen peroxide vapor (H<sub>2</sub>O<sub>2</sub>) and ultraviolet germicidal irradiation (UVGI) are being adopted and thus far appear effective, but concerns about decontamination reducing mask fit and integrity remain, as well as concerns regarding cost of the technology.[5-9]

The United States government awarded a \$415 million contract to Battelle in April 2020 to deploy 60 hydrogen peroxide vapor decontamination sites across the country.[6 ,7] While this may be feasible in resource-rich settings, the hydrogen peroxide system requires significant infrastructure and trained personnel, limiting its translation to resource-constrained areas.[7 ,9] There is therefore a need for simpler methods of respirator decontamination that can be deployed on a large scale.[10] Investigations into heat, steam, and detergent decontamination are ongoing; however, these have thus far been shown to compromise mask integrity.[3 ,5] Nebraska Medicine piloted a UVGI system that has been approved by the United States Centers for Disease Control and Prevention (CDC), which may be easier to deploy for hospitals that already have UV decontamination systems in place.[11]

Reusable respirators designed for prolonged use such as half-mask elastomeric respirators are available but have not been heavily adopted due to challenges with sterilization, cost, and bulky size.[10] Several scalable, less expensive reusable respirators have been recently developed that can be easier to decontaminate using standard hospital equipment to try to address the respirator shortage.[10 ,12] The Pneumask project for example, which repurposes snorkel masks, has already distributed more than 23,000 masks internationally.[12-15] Other types of reusable masks that aim to address barriers to communication, such as the Jelli M1 mask [16] and ClearMask, have recently been developed.[17] Potential benefits of reusable respirators compared to disposable respirators could include reduced cost and waste. The use of innovative filtration techniques and antimicrobial nanoparticles could also reduce viral spread, and when incorporated into reusable respirators, reduce cost and waste even further.[18] Introducing novel mask types, such as a variety of reusable masks, presents an opportunity to diversify the market, and in turn provide more flexibility within supply chains. This has the potential to increase efficiency and reduce cost, waste, and energy consumption associated with supply chain disruption.[19]

The global increase in the use of plastics for mask and PPE production has drastically increased medical waste, with countries such as Spain and China reporting increases of 350% and 370%, respectively.[20] As of February 2020, the production rate of face masks in China alone increased by 12 fold.[20] Rough estimates have shown the COVID-19 pandemic could generate up to 7,200 tons a day in medical waste, a sizable portion of which comes from masks.[21 ,22] A reusable respirator could be a more sustainable alternative to disposable respirators, particularly if respirator and mask usage becomes more commonplace post-pandemic, such as in Asia. [23-25] Already environmentalists have noted a surge in plastic pollution from discarded masks in the ocean and continued heavy use of disposable PPE is unlikely to be sustainable.[21 ,22 ,26]

The optimal respirator use strategy that maximizes supply, minimizes cost, and minimizes waste is unknown. This analysis estimates respirator use, cost, and waste generation in the United States over the course of the first six months of the COVID-19 pandemic to explore the optimal strategy for respirator use. For the purpose of this study, we used the following terms to describe the different respirator use and reuse strategies: single use refers to the use of one disposable respirator per patient encounter, followed by disposal; extended use refers to extended use of a disposable respirator for an entire day, followed by disposal; and reuse refers to strategies to decontaminate respirators or use of non-disposable respirators longer-term.

## Methods

### *Data sources*

We estimated respirator usage, cost and waste from late March 2020 to late September 2020. The input parameters for the model are found in Tables 1-3. Data was sourced and adapted from the scientific literature or national databases. Base case respirator cost and waste estimates used the 3M 1860 disposable respirator as well as a recently published reusable respirator.[10, 27-29]

**Table 1 Parameters used to estimate respirator usage, costs, and waste generation**

| Parameter                                                                                                                                      | Value                                                   | Reference |
|------------------------------------------------------------------------------------------------------------------------------------------------|---------------------------------------------------------|-----------|
| US Population as of 2019                                                                                                                       | 328.2 million                                           | [30]      |
| Total number of healthcare and frontline workers in US as of 2020                                                                              | 18 (17-19) million                                      | [31-33]   |
| Weight of one 3M 1860 N95 respirator                                                                                                           | 11.3 g                                                  | [28]      |
| Weight of one 3-ply disposable personal protective (PPE-100-50) surgical mask                                                                  | 8.5 g                                                   | [34 ,35]  |
| Total cost of assembled reusable Transparent Elastomeric Adaptable Long-Lasting (TEAL) respirator, minus filters                               | \$6.11 USD (\$4.42 GBP; \$5.20 Euro)                    | [10]      |
| Weight of one TEAL reusable respirator                                                                                                         | 46.5 g                                                  | [10]      |
| Weight of one reusable respirator filter                                                                                                       | 2.26 g                                                  | [10]      |
| Cost of one pair of filters required per reusable respirator                                                                                   | \$0.34 USD (\$0.25 GBP; \$0.29 Euro)                    | [10]      |
| Cost of one PPE-100-50 surgical mask                                                                                                           | \$0.15 USD (\$0.11 GBP; \$0.13 Euro)                    | [36]      |
| Cost of one 3M 1860 N95 respirator                                                                                                             | \$0.86 USD (\$0.62 GBP; \$0.73 Euro)                    | [36]      |
| Cost of the National Battelle System funded by the FDA                                                                                         | \$415 million USD (\$300.23 million GBP; \$352.93 Euro) | [6]       |
| Reduction in the number of respirators required for HCW population in the US by the use of H <sub>2</sub> O <sub>2</sub> vapor decontamination | 20-fold                                                 | [6]       |
| Reduction in the number of respirators required for HCW population in the US by the use of UVGI                                                | 5-fold                                                  | [11]      |

#### *Respirator usage*

We considered seven respirator usage strategies: one disposable respirator per patient encounter (single-use respirators), extended use of one disposable respirator per healthcare worker (HCW) per day, reuse of one respirator per HCW per day enabled by daily UVGI decontamination, reuse of one disposable respirator per HCW per day enabled by daily H<sub>2</sub>O<sub>2</sub> vapor decontamination, one reusable respirator with disposable filters per HCW, one reusable respirator with H<sub>2</sub>O<sub>2</sub> vapor-decontaminated filters per HCW, and one disposable surgical mask per HCW per day. We assumed that HCWs would be masked for all patient encounters (universal masking) given limited access to rapid COVID-19 testing nationally.[37-39] For the H<sub>2</sub>O<sub>2</sub> and UVGI decontamination strategies, we accounted for a 30% respirator discard rate due to soiled or damaged respirators as has previously been reported.[40] For each usage strategy, we considered low, average and high estimates for the size of the HCW population (17-19 million) based on estimates from the CDC, the Bureau of Labor Statistics, and published literature.[31-33]



For the one respirator per patient encounter strategy, we estimated respirators required by HCWs with exposure to patients and those without. The number of respirators required for HCWs due to patient contact was based on the number of hospitalized patients (COVID and non-COVID), average length of stay (LOS), and average number of visits from HCWs per day (Table 2).[31] Data for the number of respirators required per patient per day, LOS per patient, and the number of ICU and hospital admissions was extracted from the recent COVID-19 literature, government reports, and a previous influenza study estimating respirator usage to prevent aerosol transmission.[31 ,41-44] To estimate the number of overall hospitalized patients, we incorporated drops in hospital admission rates due to the pandemic, which were as high as 42.8% below usual rates of admissions in April, 2020 before rebounding down to 15.9% below usual rates in June/July, 2020.[45] In addition, HCWs with patient contact were estimated to be using 4 respirators per day in between direct patient care.[31 ,46] HCWs without patient contact were assumed to be using 1 respirator per day given universal masking (Table 3).

**Table 2 Hospitalization-specific parameters used to estimate number of respirators required by the one respirator per patient encounter strategy over 6-months**

| Parameter                                                                          | Total      | Reference |
|------------------------------------------------------------------------------------|------------|-----------|
| Number of hospital admissions                                                      | 14,227,773 | [47]      |
| Number of patients admitted to the general ward                                    | 12,583,927 | [41 ,47]  |
| Number of patients admitted to the ICU                                             | 1,643,846  | [41 ,47]  |
| Number of hospitalizations due to COVID-19                                         | 396,355    | [45]      |
| Average length of stay for general ward patients                                   | 4.6 days   | [42]      |
| Average length of stay for patients admitted to the ICU                            | 3.3 days   | [42]      |
| Median length of stay for non-ICU COVID-19 patients                                | 10.1 days  | [44]      |
| Median length of stay for COVID-19 patients admitted to the ICU                    | 10.5 days  | [44]      |
| Number of respirators required per day for interactions with general ward patients | 8          | [31]      |
| Number of respirators required per day for interactions with ICU patients          | 14 (12-16) | [31]      |

**Table 3 HCW-specific parameters used to estimate number of respirators required by the one respirator per patient encounter strategy**

| Parameter                                               | Total     | Number of workers w/ patient contact | Number of workers w/o patient contact | Reference |
|---------------------------------------------------------|-----------|--------------------------------------|---------------------------------------|-----------|
| Number of nursing home workers                          | 3,427,000 | 856,750                              | 2,570,250                             | [31]      |
| Number of emergency medicine service workers            | 297,000   | 267,300                              | 29,700                                | [31]      |
| Number of emergency department workers                  | 132,000   | 132,000                              | 0                                     | [31]      |
| Number of hospital workers                              | 6,053,000 | 1,997,490                            | 4,055,510                             | [31]      |
| Number of outpatient workers                            | 3,206,000 | 2,148,020                            | 1,057,980                             | [31]      |
| Number of other healthcare workers in other occupations | 6,000,000 | 0                                    | 6,000,000                             | [31 ,32]  |

We then used these results to infer estimates for extended use and reuse of respirators enabled by the alternate respirator strategies. For our one disposable respirator per HCW per day strategy, we assumed that each HCW (with or without patient contact) would use one, new respirator per day.

For the daily H<sub>2</sub>O<sub>2</sub> vapor decontamination strategy, using currently available data on respirator integrity and efficiency after multiple cycles of H<sub>2</sub>O<sub>2</sub> vapor decontamination, we assumed that a respirator could be decontaminated for up to 20 cycles, with a 30% discard rate per day due to damaged or visibly soiled respirators after each cycle of decontamination.[40] Therefore, to form our estimates for H<sub>2</sub>O<sub>2</sub> vapor decontamination-enabled reuse of respirators, we divided the one respirator per HCW worker per day usage estimates by 20 and assumed 30% of respirators would need to be replaced after each decontamination cycle/per day to account for the estimated

1  
2  
3 discard rate. Given uncertainty regarding discard rates and consistency in maximum number of cycles of  
4 decontamination nationally, we performed sensitivity analyses using 10% and 50% discard rates as well as a  
5 maximum of 10 cycles of H<sub>2</sub>O<sub>2</sub> decontamination per respirator.  
6

7 To model usage estimates for reuse of respirators enabled by daily UVGI decontamination, we used currently  
8 available data on respirator integrity and efficiency after multiple cycles of UVGI. Based on these estimates, we  
9 assumed that a respirator could be decontaminated for up to 5 cycles.[48] Therefore, to form our estimates for  
10 UVGI-enabled reuse of respirators, we divided the one respirator per healthcare worker per day usage estimates by 5  
11 and assumed 30% of respirators would need to be replaced after each decontamination cycle/per day due to the  
12 estimated discard rate.[40 ,49 ,50] Given uncertainty regarding discard rates and consistency in maximum number of  
13 cycles of decontamination nationally, we performed sensitivity analyses using 10% and 50% discard rates as well as  
14 a maximum of 2 cycles of UVGI decontamination per respirator.  
15

16 For the reusable respirators with disposable or H<sub>2</sub>O<sub>2</sub> vapor-decontaminated filter strategies, we assumed that every  
17 healthcare worker in the US will use one reusable respirator and replace or decontaminate the filters daily. Based on  
18 a recently published low-cost reusable respirator, we estimated costs and waste from a pair of filters to be  
19 approximately 2/5 of the cost and waste generated from an N95 respirator.[10] If filters were to be decontaminated  
20 using H<sub>2</sub>O<sub>2</sub> vapor, we also assumed that filters could be reused for a maximum of 20 days (20 decontamination  
21 cycles).  
22

### 23 *Cost estimate*

24 To estimate the cost accumulated by each usage method, we used the following costs, which were found in the  
25 literature and converted to 2020 US dollars: 3M respirator, \$0.86, multiplied by the number of respirators  
26 required;[36] one surgical mask, \$0.15, multiplied by the number of surgical masks required;[36] reusable  
27 respirator, \$6.11, multiplied by the number of reusable respirators required;[10] a pair of filters for reusable  
28 respirators, \$0.34, multiplied by the number of pairs of filters required; and nationally distributed H<sub>2</sub>O<sub>2</sub> vapor  
29 decontamination systems across 60 sites, \$415 million.[6] Due to variation in implementation and maintenance costs  
30 for Battelle H<sub>2</sub>O<sub>2</sub> vapor decontamination systems across sites, it was difficult to estimate exact costs.[51] We  
31 performed a sensitivity analysis to estimate lower and upper-bound costs based on data from the Battelle  
32 decontamination center in Somerville, MA and added them to the total cost of the respirators themselves. This  
33 decontamination center is capable of decontaminating 80,000 respirators per day and servicing up to roughly 157  
34 hospitals. There are currently 6,090 hospitals across the United States.[47] For the lower bound, we estimated that if  
35 each site were able to service 157 hospitals, this would require approximately 39 decontamination centers and only  
36 65% of the 415 million dollars to fund 60 sites across the United States. For the upper bound, we used a  
37 decontamination cost per respirator of \$3.25 and multiplied that by the respirator usage required for the first 6  
38 months of the pandemic.[52] In addition, we estimated the shipping costs from a large academic hospital here in  
39 Boston, MA (Massachusetts General Hospital) to the local Battelle decontamination center in Somerville, MA. The  
40 shipping costs for one day per each hospital were estimated to be \$114 to and from the site (for a total of \$228 in  
41 shipping costs; based on the estimated weight of 25 lbs. for shipping 1,000 masks over a distance of roughly 3.5  
42 miles).[53] We scaled this cost by the number of hospitals and Battelle sites across the United States over the course  
43 of the first 6 months of the pandemic and arrived at a total nation-wide shipping cost of \$250 million. We added this  
44 to the overall costs for lower, base-case, and upper bound costs. For the cost of the UVGI system, we assumed the  
45 base-case cost of the UVGI system to only include the cost of the respirators required as the literature suggests that  
46 UV systems are more readily available on site in many hospitals in comparison to H<sub>2</sub>O<sub>2</sub> vapor decontamination  
47 systems. [39] This may be because UV systems require significantly less space and personnel than H<sub>2</sub>O<sub>2</sub> vapor  
48 decontamination systems.[40] However, we also performed a sensitivity analysis to account for the varying costs  
49 and sophistication of UVGI systems, ranging from the installation of a brand new, high volume system [11] to a less  
50 expensive, lower volume system that utilizes repurposed materials.[9 ,54] In addition, we explored a range of UVGI  
51 system costs which do not include installation, maintenance, distribution, energy, or personnel costs.[9 ,11 ,48 ,54  
52 ,55] We also estimated the average cost generated per patient for each strategy by dividing the total cost by the total  
53 number of hospitalized COVID-19 patients during the first 6 months of the pandemic.  
54

### 55 *Waste estimate*

56 Waste estimates for each usage method measured the mass of the total respirators, surgical masks, and filters used  
57 and disposed of through the 6-month duration. The mass of 3M's 1860 respirator, a standard surgical mask, and a  
58 reusable respirator are 11.3 grams, 8.5 grams and 46.5 grams, respectively.[10 ,27-29] Single filters for reusable  
59  
60

respirators were estimated using  $\frac{1}{5}$  of a respirator (2.26 grams per a single filter, 4.53 grams per pair of filters).[10] Thus, to form our waste estimates, we multiplied respirator, surgical mask and reusable respirator usage by their respective masses. We estimated the average waste generated per patient for each strategy by dividing the total amount of waste by the total number of hospitalized COVID-19 patients during the first 6 months of the pandemic. We also performed an additional sensitivity analyses using an alternate disposable respirator.

#### *Ethics Approval Statement*

This study did not require ethics approval as it did not involve human participants.

#### *Patient and Public Involvement*

Patients or the public were not involved in the design, or conduct, or reporting, or dissemination plans of our research. It was not appropriate or possible to involve patients or the public in the design, or conduct, or reporting, or dissemination plans of our research.

## **Results**

#### *Mask usage*

The estimated numbers of respirators required in the United States for each strategy are shown in Table 4 and Figure 1A. The use of a new respirator per patient encounter in the U.S. would require 7.41 billion respirators. An extended-use strategy of one respirator per day per HCW would reduce need by over 50% to 3.29 billion respirators. Decontamination by UVGI would further reduce the need to 1.64 billion respirators. Employing a H<sub>2</sub>O<sub>2</sub> vapor decontamination strategy would further reduce need by 84% to only 1.15 billion respirators. A reusable respirator strategy (with either disposable or decontaminated filters), where one respirator is assigned to each HCW for the duration of the pandemic, would further reduce need to approximately 18 million respirators, for a total reduction in respirator need by over 99%. Using a new surgical mask daily would require 3.29 billion surgical masks.

#### *Cost estimate*

The estimated costs for each respirator use strategy are summarized in Table 4 and Figure 1B. The use of a new respirator per patient per HCW would cost an average of \$6.38 billion (\$16 thousand (k) per patient). Extended use of one respirator per day would reduce the cost to \$2.83 billion (\$7.13k per patient), saving approximately \$3.55 billion. The cost for the H<sub>2</sub>O<sub>2</sub> vapor decontamination strategy would reduce cost to \$1.65 billion (\$4.17k per patient), saving approximately 1.18 billion, though sensitivity analyses estimated the cost of the H<sub>2</sub>O<sub>2</sub> decontamination system could vary between \$1.51-\$4.98 billion (Supplementary Table 1). The decontamination by UVGI strategy would reduce the cost to \$1.41 billion (\$3.56k per patient), saving an additional \$24 million. A reusable respirator with disposable filters would cost \$1.24 billion (\$3.13k per patient), though this is almost entirely filter costs (\$1.13 billion). A reusable respirator with a decontaminated filter and surgical mask strategies would be the least costly strategies at \$831 million dollars and \$493 million dollars (\$2.1k and \$1.24k per patient, respectively), which is a total cost savings of over \$5.50 billion (Figure 1B). This is more than the amount of money provided by the CARES Act to support the CDC's pandemic response efforts and programs.[56]

#### *Waste estimate*

The estimated waste generated by each respirator use strategy is summarized in Table 4 and Figure 1C-D. The use of a new respirator per patient encounter per HCW would generate 84.0 million kg of waste (211.93 kg of waste per patient). Extended use of one respirator per day would reduce waste to 37.22 million kg (93.90 kg per patient). The decontamination by UVGI strategy would reduce waste to 18.61 million kg (46.95 kg per patient). A H<sub>2</sub>O<sub>2</sub> vapor decontamination (with a 30% discard rate) strategy would reduce waste to 13.03 million kg (32.87 kg per patient). A reusable respirator with disposable filters would generate 15.73 million kg of waste (14.88 million kg from filters, 39.68 kg total per patient). Pairing the reusable respirator with a decontaminated filter would significantly reduce generated waste to 1.58 million kg (3.99 kg per patient), for an overall reduction in waste generation by approximately 82.42 million kg, equivalent to going from a mass of 252 Boeing 747 airplanes to five (Figure 1D). The surgical mask strategy would generate 27.92 million kg of waste (70.45 kg per patient).

#### *Sensitivity analyses*

A sensitivity analysis of a larger commonly used disposable respirator (Gerson 1730) did not significantly change the estimated cost of the strategies or relative amounts of waste generation (Supplementary Table 2). Cost and waste

estimates for commercially available reusable half-facepiece elastomeric respirators (3M 7500 series) with P100 filters (assuming that each HCW uses one pair of filters per week) were also explored (Supplementary Table 3).[27,28,34,57] Low and high cost estimates of \$2.02 and \$2.26 billion were calculated using sources from the commercial manufacturer 3M,[28] with reusable respirator costs ranging from \$25 to \$45 per respirator with a single disposable P100 filter cost of \$7.00.[27,28] These cost estimates of \$2.02-\$2.26 billion were lower than the one respirator per day reuse strategy, but higher than the H<sub>2</sub>O<sub>2</sub> decontamination, UVGI decontamination, reusable respirator, reusable respirator with decontaminated filters, and surgical mask strategies (Table 4, Supplementary Table 3). Low and high waste estimates of 3.22 million kg and 3.59 million kg were calculated using a respirator weight of 135 grams and filter weight of 4.54 grams (Supplementary Table 3). These waste estimates were lower than the one per day reuse strategy, H<sub>2</sub>O<sub>2</sub> decontamination, UVGI, reusable respirator, and surgical mask strategies, but higher than the reusable respirator with decontaminated filters strategy (Table 4, Supplementary Table 3).

A sensitivity analysis of the H<sub>2</sub>O<sub>2</sub> decontamination system costs estimated a range of \$1.51-\$4.98 billion, with variation in cost driven by differing estimates in the number of decontamination centers required to service all of the hospitals in the United States and in the cost of the decontamination per mask (Supplementary Table 1).

Sensitivity analyses of respirator discard rates and maximum cycles of H<sub>2</sub>O<sub>2</sub> decontamination found that a 10% discard rate lowered respirator usage, cost, and waste generation by 657 million respirators, \$601 million, and 7.45 million kg, respectively. A 50% discard rate would increase respirator usage, cost and waste generation by 660 million respirators, \$570 million, and 7.44 million kg, respectively. Lowering maximum decontamination to 10 cycles increased respirator usage, cost and waste generation to 160 million respirators, \$155 million, and 1.86 million kg, respectively (Supplementary Tables 4-5).

A sensitivity analysis of the UVGI decontamination system costs estimated a range of \$1.41-1.42 billion, even accounting for variations in sophistication of technology installed (Supplementary Table 6). Sensitivity analyses of respirator discard rates and maximum cycles of UVGI decontamination found that a 10% discard rate reduced respirator usage, cost, and waste generation by 654 million respirators, \$562 million, and 7.44 million kg, respectively. A 50% discard rate increased respirator usage, cost and waste generation by 660 million respirators, \$570 million, and 7.44 million kg, respectively. Lowering maximum decontamination to 2 cycles increased respirator usage, cost, and waste generation by 990 million respirators, \$850 million, and 11.17 million kg, respectively (Supplementary Tables 7-8).

**Table 4 Numbers of respirators, cost accumulated, and waste generated per strategy over a duration of 6-months per base, low, and high number of estimated HCWs**

| Respirator strategy                                                  | Number of respirators required            | Cost accumulated (USD)         | Cost accumulated (USD) per patient | Waste generated (kg)        | Waste generated (kg) per patient |
|----------------------------------------------------------------------|-------------------------------------------|--------------------------------|------------------------------------|-----------------------------|----------------------------------|
| 1 per patient encounter                                              | 7.41 (7.22-7.59) billion                  | \$6.38 (6.21-6.52) billion     | \$16.09 (15.67-16.46) thousand     | 84.0 (81.79-85.96) million  | 211.94 (206.38-216.88)           |
| 1 per day                                                            | 3.29 (3.10-3.47) billion                  | \$2.83 (2.67-2.98) billion     | \$7.13 (6.73-7.52) thousand        | 37.22 (35.15-39.29) million | 93.90 (88.69-99.12)              |
| UVGI-decontaminated 3M 1860 N95 respirators                          | 1.64 (1.55-1.73) billion                  | \$1.41 (1.33-1.49) billion     | \$3.56 (3.37-3.76) thousand        | 18.61 (17.58-19.64) million | 46.95(44.34-49.56)               |
| H <sub>2</sub> O <sub>2</sub> decontaminated 3M 1860 N95 respirators | 1.15 (1.09-1.21) billion                  | \$1.65 (1.60-1.71) billion     | \$4.17 (4.03-4.31) thousand        | 13.03 (12.30-13.75) million | 32.87 (31.04-34.69)              |
| Reusable TEAL respirator + disposable filters                        | 0.018 (0.017-0.019) billion               | \$1.24 (1.17-1.31) billion     | \$3.13 (2.96-3.30) thousand        | 15.73 (14.85-16.60) million | 39.68 (37.47-41.88)              |
| Reusable TEAL respirator + decontaminated filters                    | 0.018 (0.017-0.019) billion               | \$0.831 (0.822 -0.841) billion | \$2.10 (2.07 -2.12) thousand       | 1.58 (1.49-1.67) million    | 3.99 (3.77-4.21)                 |
| Surgical mask, 1 per day                                             | 3.29 (3.10-3.47) billion (surgical masks) | \$0.493 (0.465-0.520) billion  | \$1.24 (1.17-1.31) thousand        | 27.92 (26.37-29.47) million | 70.45 (66.53 -74.36)             |

## Discussion

### *Principal findings*

The COVID-19 pandemic has dramatically increased the demand for respirators across the world, leading to supply shortages, spending in the billions of dollars, and generation of large amounts of medical waste. Even after widespread vaccination efforts, masks will likely continue to be required due to factors such as variable vaccine uptake, incomplete vaccinations, lack of knowledge as to who has received a vaccine, the possibility of reinfection, and unclear duration of vaccination efficacy.[58 ,59] Additionally, even after the pandemic, respirator and mask usage both in healthcare settings and among the general public may persist.[60] The continued use of disposable respirators and masks is unlikely to be sustainable and will have significant environmental consequences.[45] With this in mind, it is critical to understand the best strategy to maximize respirator and mask availability while minimizing costs and waste generation.

Of the strategies compared, we find that all reuse strategies (UVGI decontamination, H<sub>2</sub>O<sub>2</sub> vapor decontamination, reusable respirators with disposable filters, or reusable respirators with decontaminated filters), could significantly decrease the number of respirators required compared to single- or extended-use mask strategies by at least 1.65 billion respirators in the United States alone. This would greatly increase availability and access of respirators worldwide. In addition, reuse strategies could save at least \$1.18 billion dollars in costs nationally over the course of the pandemic. Finally, reuse strategies significantly reduce waste generation in the United States by at least 18.61 million kg. These estimates from our study only capture the economic and environmental impact over the first six months of the COVID-19 pandemic in the US and suggest that the long-term and global impact of reuse strategies are even higher, especially when considering respirators and masks used by the general population.

Our analyses found that UVGI decontamination, H<sub>2</sub>O<sub>2</sub> vapor decontamination, and reusable respirators with disposable filters were similar in cost and waste generation. Combining the strategies by utilizing a reusable respirator with either H<sub>2</sub>O<sub>2</sub> vapor-decontaminated filters was the least costly of all strategies compared and generated the least amount of waste. This finding suggests that even with UVGI and H<sub>2</sub>O<sub>2</sub> vapor decontamination strategies, the adoption of a reusable respirator can have a significant impact in both cost and waste generation, though additional studies are needed to estimate the impact of additional costs, such as shipping to shared decontamination sites, installation costs, and time associated with decontamination or cleaning methods. Additional investigation is needed to capture other potential costs and benefits related to each mask-reuse strategy.

In settings where UVGI or H<sub>2</sub>O<sub>2</sub> vapor decontamination are not feasible, such as in resource-constrained settings where installation and maintenance of such systems are challenging, reusable respirators with disposable filters may be preferable to disposable respirators. These respirators may also be decontaminated with standard hospital equipment such as alcohol and bleach wipes, which may be more readily available in settings with limited resources.[10 ,12] Anticipatory investment in a reusable respirator may not only provide access to high-quality PPE for COVID-19 in such settings but reduce overall waste and injury to our environment. Development of technologies to facilitate decontamination of respirators and/or filters that do not require special equipment, training, or infrastructure could even further reduce costs and waste as in the reusable respirator with decontaminated filters strategy.

### *Limitations*

One potential limitation of our study is the assumption that all respirator strategies discussed are equally effective at protecting the user. The decision to employ decontamination methods for reuse should be weighed against the possibility for greater health risks incurred by incomplete decontamination or lowered respirator efficacy, which may incur additional costs. The CDC recommended extended respirator use and reuse strategies for N95 respirators if respirators maintained their fit and function after decontamination.[61] Several studies have evaluated the effect of extended use and re-use strategies that require multiple donning on the fit and efficacy of N95 respirators independent of decontamination. One study found that 48% of subjects failed a fit test after only one redonning of an N95 respirator. Additionally, another study found that among test subjects experienced in respirator donning, consecutively donning the same respirator 5 times was the threshold before mask-fit dropped below 100%.[62] Furthermore, both UVGI and H<sub>2</sub>O<sub>2</sub> decontamination methods have shown to reduce filtration and mask performance after 3 rounds of decontamination in some studies.[63] Therefore, it is important to note that the efficacy of each reuse strategy may not be equal and should be considered prior to implementation. Potential costs related to unequal respirator efficiency and protection were not estimated in our analysis.

1  
2  
3  
4 An additional limitation of our study is that we modelled one strategy for all HCWs, regardless of frequency and  
5 type of patient contact. For HCWs at low risk of contact with bodily fluids (including respiratory droplets), it may be  
6 possible to deploy alternate strategies such as extended use of disposable respirators or less frequent  
7 decontamination. This could potentially further reduce cost and waste and increase respirator availability without  
8 sacrificing protection.  
9

10 We estimated only a few respirator strategies and decontamination methods, and other methods for extended  
11 respirator use and reuse across the world were not captured in our analysis. Furthermore, our estimates were  
12 performed from a US perspective, and these numbers will be different for other countries depending on parameters  
13 such as number of healthcare workers, rates of infection, and number of hospitalized patients, though we suspect  
14 that the relative benefit of reuse strategies compared to single- or extended-use respirator strategies will persist.  
15 Additionally, the number of COVID-19 hospitalizations were likely underestimated in this study, as only two-thirds  
16 of states and territories in the United States have reported this data during the COVID-19 pandemic; however, we  
17 suspect that this therefore underestimates the potential impact of mask reuse strategies.[46] Furthermore, our cost  
18 estimates did not include installation, maintenance, distribution, or personnel costs associated with various  
19 strategies, and additional studies should be performed. In addition, our analysis measured only the waste generated  
20 by masks themselves and did not study the environmental impact of manufacturing, packaging or waste generation  
21 from decontamination processes, which some studies estimate could generate up to 90% of greenhouse gas  
22 emissions.[19] Furthermore, the environmental impact of single-use plastics generated from packaging related to  
23 mask use, estimated to have increased by up to 40% during the pandemic, may contribute a significant amount of  
24 additional environmental waste.[64] These aspects were not included in our analyses and require further  
25 quantification. Finally, our estimates for the reusable respirator strategy was based on a recently published  
26 prototype.[10] Updated analyses should be performed as these and other low-cost reusable respirators and masks  
27 become more available.[12 ,65]

### 28 *Implications and future research*

29 While our analysis measured the economic and environmental impact of several mask reuse strategies, there are  
30 several areas of investigation that may contribute to further reductions in cost and environmental impact. For  
31 example, our analysis highlighted the importance of considering not only reusable respirators, but reusable or  
32 decontaminatable filters, as these drove the cost and waste of reusable respirator/disposable filter strategies.  
33 Inexpensive, low-tech methods for filter decontamination are needed. Alternatively, redesign of reusable respirators  
34 to require smaller filters or development of fully reusable respirators would greatly reduce cost, waste and  
35 potentially the need for single-use plastics. Additionally, the development of novel materials for masks to increase  
36 durability of these systems after repeated exposures to H<sub>2</sub>O<sub>2</sub> vapor or other decontamination techniques may  
37 increase the lifespan of masks and decrease the volume of masks used. Incorporation of bactericidal or antiviral  
38 agents, nanoparticles, or nanotechnology into masks may also increase their reusability and potentially decrease the  
39 need for cleaning agents in regions where there may be concomitant shortages of these solutions. Antimicrobial  
40 agents derived from natural products (tea tree oil, grapefruit seed extract, etc.) as well as nanoparticles (NPs) from  
41 different metals and metal compounds (copper, silver, zinc oxide, etc.) have also been shown to improve filtration  
42 and reduce viral load on mask surfaces.[14 ,15] There are a variety of masks now commercially available that use  
43 nanotechnology and range from disposable surgical masks, washable masks, and reusable respirators such as  
44 Innonix RespoKare (citric acid NPs), Cupron Inc. (copper NPs), and Argaman BioBlockX™ (silver NPs).[14 ,15  
45 ,18] These strategies may also decrease waste of common hospital-based wipes used to decontaminate masks, which  
46 was not included in this analysis. Finally, the development of biodegradable or recyclable materials that provide  
47 efficient particle protection may minimize the environmental effects of discarded masks.

48 Our analysis raises key questions for stakeholders regarding the optimal strategy to both provide sufficient  
49 protection for healthcare workers and patients while also assuring equitable access to PPE and reducing  
50 environmental harm. Given our findings that reusable respirator strategies greatly reduce the number of respirators  
51 required and medical waste generated, it is interesting that reusable respirators or decontamination strategies have  
52 largely not been adopted in the US prior to the COVID-19 pandemic. We hypothesize that this could be due to a  
53 number of reasons including cost and availability of reusable respirators, lack of recognition of the scale of medical  
54 waste and its impact on the environment, and individual healthcare systems' lack of accountability with regard to  
55 medical waste. We have reason to believe that the first two reasons will be addressed over the course of the  
56 pandemic. Given renewed interest in new technologies for PPE, we expect options and availability for reusable  
57

1  
2  
3 respirators to continue to expand.[15] We believe our study as well as others will increase public awareness of the  
4 environmental impact of disposable PPE, particularly masks.[22 ,38 ,64] In order to improve hospital system  
5 accountability over medical waste, however, we may need to turn to policymakers to consider nationwide incentives  
6 such as subsidies to transition to reusable PPE, taxes to offset medical waste generation, and other incentives as has  
7 been used to promote transition to green technologies in other fields.[66-68]

### 8 9 *Conclusions*

10 In summary, respirator reuse technologies are critical to meet the supply demands imparted by COVID-19,  
11 especially in low-resource settings. This need is emphasized by the likelihood that respirators will continue to be  
12 commonly used even after widespread vaccination and post-pandemic in certain scenarios, such as healthcare and  
13 crowded transportation areas, and such technologies can enable more sustainable use of respirators moving forward.  
14 Furthermore, these technologies can save billions of dollars that can be redistributed toward other efforts for  
15 economic and environmental recovery brought on by the pandemic. Further study is needed regarding reuse fit and  
16 filtration efficacy to minimize health risks associated with reuse strategies. Additionally, future development of low-  
17 cost, low-tech technologies to enable respirator and/or filter decontamination is needed to further minimize the  
18 economic and environmental costs of respirators.

### 19 **Footnotes**

20  
21 **Contributors:** JNC, OG, JC, CH, and GT conceived and designed the analysis. JB, AW, PRC, and FD contributed  
22 data. JNC, OG, and JC collected data and performed the analysis. JNC, OG, JC, and GT wrote the manuscript. JNC,  
23 OG, JC, JB, AW, PRC, FD, CH, and GT interpreted the data and reviewed and approved the manuscript. The  
24 corresponding author, GT, provided supervision over the study and is the guarantor. GT confirms that all authors  
25 meet the authorship criteria and no contributing authors have been omitted.

26  
27 **Funding:** JNC: 5T32DK007191; OG: MIT Undergraduate Research Opportunities Program, N/A; PC: NIH  
28 K23DA044874, R44DA051106

29  
30 **Competing interests:** The authors declare the following competing financial interest(s): AJW, JDB, and GT have  
31 filed multiple patents surrounding the respirator and sensors. In addition, AJW, JDB and GT have a financial interest  
32 in TEAL Bio, a biotechnology company focused on developing the next generation of personal protective  
33 equipment. JNC, PRC, OG, JC, FD, and CH declare no competing interests.

34  
35 **Data Sharing:** All data is included in the manuscript and/or supplementary materials, no additional data is  
36 available.

37  
38 GT provides attestation that this study reflects honest and accurate data and transparent disclosure of all relevant  
39 information. Nothing has been omitted or withheld from this study.

40  
41 **Fig. 1** Comparison of the following per respirator reuse strategy: A) number of respirators or surgical masks used,  
42 B) costs in billions of USD, C) waste generated in millions of kg, D) waste generated per strategy in the equivalent  
43 number of 747 airplanes by mass (mass of one 747 airplane, 333,000 kg).

## References

1. Ranney ML, Griffeth V, Jha AK. Critical Supply Shortages — The Need for Ventilators and Personal Protective Equipment during the Covid-19 Pandemic. *The New England journal of medicine* 2020;382(18):e41-e41. doi: 10.1056/nejmp2006141
2. Remuzzi A, Remuzzi G. COVID-19 and Italy: what next? *The Lancet (British edition)* 2020;395(10231):1225-28. doi: 10.1016/s0140-6736(20)30627-9
3. Livingston E, Desai A, Berkwits M. Sourcing Personal Protective Equipment During the COVID-19 Pandemic. *JAMA : the journal of the American Medical Association* 2020;323(19):1912-14. doi: 10.1001/jama.2020.5317
4. Garcia Godoy LR, Jones AE, Anderson TN, et al. Facial protection for healthcare workers during pandemics: a scoping review. *BMJ global health* 2020;5(5):e002553. doi: 10.1136/bmjgh-2020-002553
5. Rubio-Romero JC, Pardo-Ferreira MdC, Torrecilla-García JA, et al. Disposable masks: Disinfection and sterilization for reuse, and non-certified manufacturing, in the face of shortages during the COVID-19 pandemic. *Safety science* 2020;129:104830-30. doi: 10.1016/j.ssci.2020.104830
6. Books B. Final Report for the Bioquell Hydrogen Peroxide Vapor (HPV) Decontamination for Reuse of N95 Respirators: Battelle July 2016 [Available from: <https://www.fda.gov/media/136386/download>].
7. Battelle. Battelle CCDS FAQ 2020 [Updated April, 2020; web page was removed]. [Available from: <https://www.battelle.org/inb/battelle-ccds-for-covid19-satellite-locations>].
8. Fisher EM, Shaffer RE. Considerations for Recommending Extended Use and Limited Reuse of Filtering Facepiece Respirators in Health Care Settings. *Journal of occupational and environmental hygiene* 2014;11(8):D115-D28. doi: 10.1080/15459624.2014.902954
9. Gilbert RM, Donzanti MJ, Minahan DJ, et al. Mask Reuse in the COVID-19 Pandemic: Creating an Inexpensive and Scalable Ultraviolet System for Filtering Facepiece Respirator Decontamination. *Global health science and practice* 2020;8(3):582-95. doi: 10.9745/GHSP-D-20-00218
10. Byrne JD, Wentworth AJ, Chai PR, et al. Injection Molded Autoclavable, Scalable, Conformable (iMASC) system for aerosol-based protection: a prospective single-arm feasibility study. *BMJ open* 2020;10(7):e039120-e20. doi: 10.1136/bmjopen-2020-039120
11. John J. Lowe ea. N95 Filtering Facepiece Respirator Ultraviolet Germicidal Irradiation (UVGI) Process for Decontamination and Reuse. *Nebraska Medicine* April 2020
12. Kroo L, Kothari A, Hannebelle M, et al. Pneumask: Modified Full-Face Snorkel Masks as Reusable Personal Protective Equipment for Hospital Personnel. 2020:2020.04.24.20078907. doi: 10.1101/2020.04.24.20078907 %J medRxiv
13. Pneumask: Modified Full-Face Snorkel Masks as Reusable Personal Protective Equipment for Hospital Personnel. *Respiratory Therapeutics Week* 2020:358.
14. Chua MH, Cheng W, Goh SS, et al. Face Masks in the New COVID-19 Normal: Materials, Testing, and Perspectives. *Research (Washington)* 2020;2020:1-40. doi: 10.34133/2020/7286735
15. Palmieri V, De Maio F, De Spirito M, et al. Face masks and nanotechnology: Keep the blue side up. *Nano Today* 2021;37:101077. doi: 10.1016/j.nantod.2021.101077 [published Online First: 2021/02/02]
16. M1 J. Smile again JELLI M1 2021 [Available from: <https://jellim.com/>].
17. ClearMask. See the person, not the mask.™ 2021 [Available from: <https://www.theclearmask.com/>].
18. Kumar A, Sharma A, Chen Y, et al. Copper@ZIF-8 Core-Shell Nanowires for Reusable Antimicrobial Face Masks. *Advanced functional materials* 2021;31(10):2008054-n/a. doi: 10.1002/adfm.202008054
19. Klemeš JJ, Fan YV, Jiang P. The energy and environmental footprints of COVID-19 fighting measures – PPE, disinfection, supply chains. *Energy (Oxford)* 2020;211:118701-01. doi: 10.1016/j.energy.2020.118701
20. Jiang P, Klemeš JJ, Fan YV, et al. More Is Not Enough: A Deeper Understanding of the COVID-19 Impacts on Healthcare, Energy and Environment Is Crucial. *Int J Environ Res Public Health* 2021;18(2):684. doi: 10.3390/ijerph18020684
21. Chhabria P. Coronavirus: "The masks you throw away could end up killing a whale": BBC July 7 2020 [cited 2020]. [Available from: <https://www.bbc.com/news/av/science-environment-53287940>].



22. Klemeš JJ, Fan YV, Tan RR, et al. Minimising the present and future plastic waste, energy and environmental footprints related to COVID-19. *Renewable & sustainable energy reviews* 2020;127:109883-83. doi: 10.1016/j.rser.2020.109883
23. Leung H. Why Wearing a Face Mask Is Encouraged in Asia, but Shunned in the U.S. *TIMEMarch* 2020 [cited 2020]. [Available from: <https://time.com/5799964/coronavirus-face-mask-asia-us/2020>].
24. Jennings R. COVID-19 Pandemic: How Cultural Differences Help Asian Countries Beat COVID-19, While US Struggles *Voice of America* 2020 [Updated April 2021- Page has been removed]. [Available from: <https://www.voanews.com/covid-19-pandemic/how-cultural-differences-help-asian-countries-beat-covid-19-while-us-struggles2020>].
25. Burgess A, Horii M. Risk, ritual and health responsabilisation: Japan's 'safety blanket' of surgical face mask-wearing. *Sociology of health & illness* 2012;34(8):1184-98. doi: 10.1111/j.1467-9566.2012.01466.x
26. Konyn C. Another Side Effect of COVID-19: The Surge in Plastic Pollution *Earth.org* July 6th, 2020 [Available from: <https://earth.org/covid-19-surge-in-plastic-pollution/2020>].
27. MSC Industrial Direct Company. Product details 3M P100 filters, series 2000. 2020 [Available from: <https://www.msdirect.com/product/details/00324533>].
28. 3M. Science Applied to Life. 3M™ Half Facepiece Respirator Assembly 6291/07002(AAD), Medium, with 3M™ Particulate Filters 2091/07000(AAD), P100 24 EA/Case. *Products* 2020 [Available from: [https://www.3m.com/3M/en\\_US/company-us/all-3m-products/~3M-Half-Facepiece-Respirator-Assembly-6291-07002-AAD-Medium-with-3M-Particulate-Filters-2091-07000-AAD-P100-24-EA-Case/?N=5002385+8709322+8711405+3294780266&preselect=8720539+8720550+8720785&rt=rud](https://www.3m.com/3M/en_US/company-us/all-3m-products/~3M-Half-Facepiece-Respirator-Assembly-6291-07002-AAD-Medium-with-3M-Particulate-Filters-2091-07000-AAD-P100-24-EA-Case/?N=5002385+8709322+8711405+3294780266&preselect=8720539+8720550+8720785&rt=rud)].
29. Safety Company. Gerson 1730 N95 Particulate Respirator 2021 [Available from: <https://www.safetycompany.com/respirators/disposable-respirators-and-masks/gerson-1730-n95-particulate-respirator-20-each/>]; accessed 2021 March 29.
30. United States Census Bureau. U.S. Population 2019 [cited 2020]. [Available from: <https://www.census.gov/newsroom/press-releases/2019/new-years-population.html#:~:text=FEB.%201%2C%202019%20%E2%80%94%20As,from%20New%20Year's%20Day%202018>].
31. Carias C, Rainisch G, Shankar M, et al. Potential demand for respirators and surgical masks during a hypothetical influenza pandemic in the United States. *Clinical infectious diseases* 2015;60 Suppl 1(suppl\_1):S42-S51. doi: 10.1093/cid/civ141
32. CDC. Healthcare Workers. *The National Institute for Occupational Safety and Health (NIOSH) CDC*; 2017 [Available from: <https://www.cdc.gov/niosh/topics/healthcare/default.html>].
33. Kaisers Family Foundation. Total Healthcare Employment May 2018 [Available from: <https://www.kff.org/other/state-indicator/total-health-care-employment/?currentTimeframe=0&sortModel=%7B%22colId%22:%22Location%22,%22sort%22:%22sc%22%7D>]; accessed 2020.
34. Indiamart. Face Mask (3 Ply Non-Woven With Ties And Full Weld) 2021 [Available from: <https://www.indiamart.com/proddetail/face-mask-3-ply-non-woven-with-ties-and-full-weld-4324828512.html>]; accessed 2021 March 29.
35. ADESSO. 3 Ply Disposable Personal Protective Face Mask (50 Masks/Box) 2021 [Available from: <https://www.adesso.com/product/3-ply-disposable-face-mask-with-ear-loop-non-medical-pack-of-50/>]; accessed 2021 March 29.
36. Mukerji S, MacIntyre CR, Seale H, et al. Cost-effectiveness analysis of N95 respirators and medical masks to protect healthcare workers in China from respiratory infections. *BMC infectious diseases* 2017;17(1):464-64. doi: 10.1186/s12879-017-2564-9
37. Asadi S, Cappa CD, Barreda S, et al. Efficacy of masks and face coverings in controlling outward aerosol particle emission from expiratory activities. *Scientific reports* 2020;10(1):15665-65. doi: 10.1038/s41598-020-72798-7
38. Silverman JD, Hupert N, Washburne AD. Using influenza surveillance networks to estimate state-specific prevalence of SARS-CoV-2 in the United States. *Science translational medicine* 2020;12(554):eabc1126. doi: 10.1126/scitranslmed.abc1126
39. Gostin LO, Cohen IG, Koplan JP. Universal Masking in the United States: The Role of Mandates, Health Education, and the CDC. *JAMA : the journal of the American Medical Association* 2020;324(9):837-38. doi: 10.1001/jama.2020.15271
40. Czubyrt MP, Stecy T, Popke E, et al. N95 mask reuse in a major urban hospital: COVID-19 response process and procedure. *The Journal of hospital infection* 2020;106(2):277-82. doi: 10.1016/j.jhin.2020.07.035

- 1
- 2
- 3
- 4 41. UCSF Philip R. Lee Institute for Health Policy Studies. ICU Outcomes 2020 [Available from:  
5 <https://healthpolicy.ucsf.edu/icu-outcomes>].
- 6 42. Agency for Healthcare Research and Quality. Overview of U.S. Hospital Stays in 2016: Variation by  
7 Geographic Region [Available from: [https://www.hcup-us.ahrq.gov/reports/statbriefs/sb246-Geographic-](https://www.hcup-us.ahrq.gov/reports/statbriefs/sb246-Geographic-Variation-Hospital-Stays.jsp)  
8 [Variation-Hospital-Stays.jsp](https://www.hcup-us.ahrq.gov/reports/statbriefs/sb246-Geographic-Variation-Hospital-Stays.jsp)].
- 9 43. Hunter A, Johnson L, Coustasse A. Reduction of Intensive Care Unit Length of Stay: The Case of Early  
10 Mobilization. *The health care manager* 2020;39(3):109-16. doi: 10.1097/HCM.000000000000295
- 11 44. Incidence, clinical outcomes, and transmission dynamics of severe coronavirus disease 2019 in California and  
12 Washington: prospective cohort study. *BMJ* 2020;369:m2205-m05. doi: 10.1136/bmj.m2205
- 13 45. The COVID Tracking Project. National Hospitalization 2020 [updated November 16<sup>th</sup>, 2020; Cumulative  
14 hospitalization data was removed from the website]. [Available from:  
15 <https://covidtracking.com/data/national/hospitalization>].
- 16 46. Bartsch SM, Ferguson MC, McKinnell JA, et al. The Potential Health Care Costs And Resource Use Associated  
17 With COVID-19 In The United States. *Health affairs (Project Hope)* 2020;39(6):101377hlthaff202000426-  
18 935C. doi: 10.1377/hlthaff.2020.00426
- 19 47. American Hospital Association. Fast Facts on U.S. Hospitals, 2020 [cited 2020]. [Available from:  
20 <https://www.aha.org/statistics/fast-facts-us-hospitals>].
- 21 48. O'Hearn K, Gertsman S, Sampson M, et al. Decontaminating N95 and SN95 masks with ultraviolet germicidal  
22 irradiation does not impair mask efficacy and safety. *J Hosp Infect* 2020;106(1):163-75. doi:  
23 10.1016/j.jhin.2020.07.014 [published Online First: 2020/07/21]
- 24 49. Brickman J, Scott C, Courtad C, Awad C, Fiorito K, Griffin A, Marrs R, et al. Optimization, Validation, and  
25 Implementation of a UV Disinfection Method for N95 Face Masks. *University of Chicago* 2020. [Available  
26 from:  
27 [https://static1.squarespace.com/static/5e8126f89327941b9453eeef/t/5eacab4783c6b418d137baf3/15883743](https://static1.squarespace.com/static/5e8126f89327941b9453eeef/t/5eacab4783c6b418d137baf3/1588374356749/UCMC+Surfacide+Mask+UVGI+Process+Validation+and+Process+v6.pdf)  
28 [56749/UCMC+Surfacide+Mask+UVGI+Process+Validation+and+Process+v6.pdf](https://static1.squarespace.com/static/5e8126f89327941b9453eeef/t/5eacab4783c6b418d137baf3/1588374356749/UCMC+Surfacide+Mask+UVGI+Process+Validation+and+Process+v6.pdf)]; accessed August 2020.
- 29 50. Liao L, Xiao W, Zhao M, et al. Can N95 Respirators Be Reused after Disinfection? How Many Times? *ACS*  
30 *nano* 2020;14(5):6348-56. doi: 10.1021/acsnano.0c03597
- 31 51. Wigginton KR, Arts PJ, Clack HL, et al. Validation of N95 Filtering Facepiece Respirator Decontamination  
32 Methods Available at a Large University Hospital. *Open forum infectious diseases* 2021;8(2):ofaa610-  
33 ofaa10. doi: 10.1093/ofid/ofaa610
- 34 52. Ostriker R. Boston Hospitals getting 'game changer' machine that sterilizes 80,000 protective masks a day *The*  
35 *Boston Globe* April 2, 2020.
- 36 53. The UPS Store. Estimate Shipping Cost 2021 [Available from: [https://www.theupsstore.com/tools/estimate-](https://www.theupsstore.com/tools/estimate-shipping-cost)  
37 [shipping-cost](https://www.theupsstore.com/tools/estimate-shipping-cost)].
- 38 54. Ou Q, Pei C, Chan Kim S, et al. Evaluation of decontamination methods for commercial and alternative  
39 respirator and mask materials – view from filtration aspect. *Journal of aerosol science* 2020;150:105609-  
40 09. doi: 10.1016/j.jaerosci.2020.105609
- 41 55. de Robles D, Kramer SW. Improving Indoor Air Quality through the Use of Ultraviolet Technology in  
42 Commercial Buildings. *Procedia engineering* 2017;196:888-94. doi: 10.1016/j.proeng.2017.08.021
- 43 56. Snell K. What's Inside The Senate's \$2 Trillion Coronavirus Aid Package NPR.org; NPR.org; March 26 2020  
44 [Available from: [https://www.npr.org/2020/03/26/821457551/whats-inside-the-senate-s-2-trillion-](https://www.npr.org/2020/03/26/821457551/whats-inside-the-senate-s-2-trillion-coronavirus-aid-package2020)  
45 [coronavirus-aid-package2020](https://www.npr.org/2020/03/26/821457551/whats-inside-the-senate-s-2-trillion-coronavirus-aid-package2020)].
- 46 57. Chalikonda S, Waltenbaugh H, Angelilli S, et al. Implementation of an Elastomeric Mask Program as a Strategy  
47 to Eliminate Disposable N95 Mask Use and Resterilization: Results from a Large Academic Medical  
48 Center. *J Am Coll Surg* 2020;231(3):333-38. doi: 10.1016/j.jamcollsurg.2020.05.022 [published Online  
49 First: 2020/06/15]
- 50 58. Kortepeter M. Why You'll Still Need To Wear A Mask Even After Covid-19 Vaccines Arrive Forbes2020  
51 [updated October 20]. [Available from:  
52 [https://www.forbes.com/sites/coronavirusfrontlines/2020/10/20/why-youll-still-need-to-wear-a-mask-even-](https://www.forbes.com/sites/coronavirusfrontlines/2020/10/20/why-youll-still-need-to-wear-a-mask-even-after-covid-19-vaccines-arrive/?sh=600022ab5a42)  
53 [after-covid-19-vaccines-arrive/?sh=600022ab5a42](https://www.forbes.com/sites/coronavirusfrontlines/2020/10/20/why-youll-still-need-to-wear-a-mask-even-after-covid-19-vaccines-arrive/?sh=600022ab5a42)].
- 54 59. Dr. Fauci says masks, social distancing will still be needed after a Covid-19 vaccine—here's why CNBC 2020  
55 [updated November 16]. [Available from: [https://www.cnbc.com/2020/11/16/fauci-why-still-need-masks-](https://www.cnbc.com/2020/11/16/fauci-why-still-need-masks-social-distancing-after-covid-19-vaccine.html)  
56 [social-distancing-after-covid-19-vaccine.html](https://www.cnbc.com/2020/11/16/fauci-why-still-need-masks-social-distancing-after-covid-19-vaccine.html)].
- 57 60. BBC News. Covid: Masks and social distancing 'could last years' 2021 [Available from:  
58 <https://www.bbc.com/news/uk-56475807>].
- 59
- 60

- 1  
2  
3 61. CDC. Recommended Guidance for Extended Use and Limited Reuse of N95 Filtering Facepiece Respirators in  
4 Healthcare Settings 2020 [Available from:  
5 <https://www.cdc.gov/niosh/topics/hcwcontrols/recommendedguidanceextuse.html>].  
6 62. ECRI Clinical Evidence Assessment. Safety of Extended Use and Reuse of N95 Respirators 2020. [Available  
7 From: [https://www.elsevier.com/\\_data/assets/pdf\\_file/0006/997863/COVID-ECRI-N95-  
8 Respirators\\_2020-03.pdf](https://www.elsevier.com/_data/assets/pdf_file/0006/997863/COVID-ECRI-N95-Respirators_2020-03.pdf)].  
9 63. Fischer RJ, Morris DH, van Doremalen N, et al. Effectiveness of N95 Respirator Decontamination and Reuse  
10 against SARS-CoV-2 Virus. *Emerg Infect Dis* 2020;26(9):2253-55. doi: 10.3201/eid2609.201524  
11 64. Patrício Silva AL, Prata JC, Walker TR, et al. Increased plastic pollution due to COVID-19 pandemic:  
12 Challenges and recommendations. *Chemical engineering journal (Lausanne, Switzerland : 1996)*  
13 2021;405:126683-83. doi: 10.1016/j.cej.2020.126683  
14 65. Robert E. Fischell Institute for Biomedical Devices. Researchers Develop Rapid Deployment Mask University  
15 of Maryland 2020 [Available from: [https://fischellinstitute.umd.edu/news/story/researchers-develop-rapid-  
16 deployment-mask](https://fischellinstitute.umd.edu/news/story/researchers-develop-rapid-deployment-mask)].  
17 66. U.S. Energy Information Administration. Renewable Energy Explained: Incentives 2021 [Available from:  
18 <https://www.eia.gov/energyexplained/renewable-sources/incentives.php>].  
19 67. Lobel R, Perakis G. Consumer Choice Model for Forecasting Demand and Designing Incentives for Solar  
20 Technology. *SSRN Electronic Journal* doi: 10.2139/ssrn.1748424  
21 68. Singh N, Tang Y, Ogunseitan OA. Environmentally Sustainable Management of Used Personal Protective  
22 Equipment. *Environ Sci Technol* 2020;54(14):8500-02. doi: 10.1021/acs.est.0c03022  
23  
24  
25  
26  
27  
28  
29  
30  
31  
32  
33  
34  
35  
36  
37  
38  
39  
40  
41  
42  
43  
44  
45  
46  
47  
48  
49  
50  
51  
52  
53  
54  
55  
56  
57  
58  
59  
60

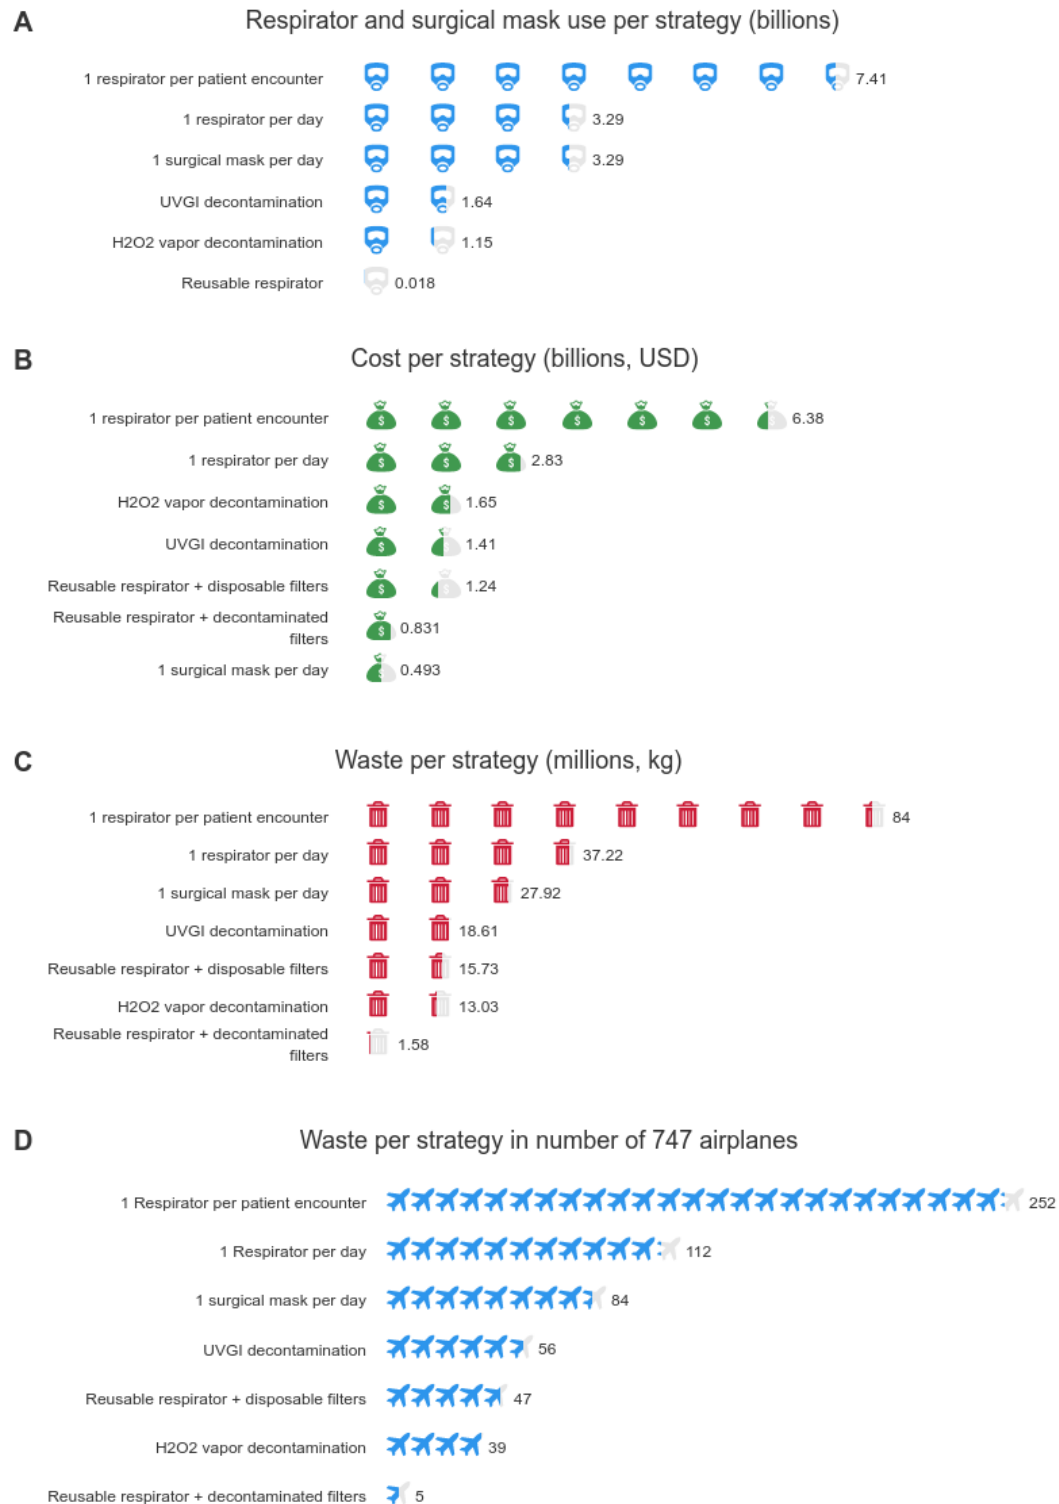

**Fig. 1** Comparison of the following per respirator reuse strategy: A) number of respirators or surgical masks used, B) costs in billions of USD, C) waste generated in millions of kg, D) waste generated per strategy in the equivalent number of 747 airplanes by mass (mass of one 747 airplane, 333,000 kg).

**Supplementary Table 1 Sensitivity analysis: H<sub>2</sub>O<sub>2</sub> decontamination strategy cost**

| Base system cost | Shipping cost | Respirator cost | Overall cost accumulated (USD) |
|------------------|---------------|-----------------|--------------------------------|
| \$268 million    | \$250 million | \$989 million   | \$1.51 billion                 |
| \$415 million    | \$250 million | \$989 million   | \$1.65 billion                 |
| \$3.74 billion   | \$250 million | \$989 million   | \$4.98 billion                 |

**Supplementary Table 2 Sensitivity analysis: Disposable Gerson 1730 respirator\***

| Respirator strategy                                           | Number of respirators required | Cost accumulated (USD)        | Waste generated (kg)        |
|---------------------------------------------------------------|--------------------------------|-------------------------------|-----------------------------|
| 1 per patient (all hospitalized patients)                     | 7.41 (7.22-7.59) billion       | \$6.52 (6.35-6.68) billion    | 126.0 (122.7-129.0) million |
| 1 per day                                                     | 3.29 (3.10-3.47) billion       | \$2.89 (2.73-3.05) billion    | 55.85 (52.74-58.95) million |
| UVGI-decontaminated N95 respirators                           | 1.64 (1.55-1.73) billion       | \$1.45 (1.37-1.53) billion    | 27.92 (26.37-29.47) million |
| H <sub>2</sub> O <sub>2</sub> -decontaminated N95 respirators | 1.15 (1.09-1.21) billion       | \$1.68 (1.62-1.73) billion    | 19.55 (18.46-20.63) million |
| Reusable respirator + disposable filters                      | 0.018 (0.017-0.019) billion    | \$1.27 (1.20-1.34) billion    | 23.18 (21.93-24.42) million |
| Reusable respirator + decontaminated filters                  | 0.018 (0.017-0.019) billion    | \$0.833 (0.824-0.842) billion | 1.955 (1.893-2.017) million |

\*The weight of one Gerson 1730 N95 Respirator is equal to 17g

**Supplementary Table 3 Sensitivity analysis: Reusable elastomeric respirator + disposable p100 filter**

| Parameter                               | Value                      |
|-----------------------------------------|----------------------------|
| Number of respirators required          | 18 (17-19) million         |
| Number of filters required (by pair)    | 108 (102-114) million      |
| <b>Results</b>                          |                            |
| Reusable respirator + filter cost (USD) | \$2.14 (2.02-2.26) billion |
| Reusable respirator + filter waste (kg) | 3.41 (3.22-3.59) million   |

**Supplementary Table 4 Sensitivity analysis: H<sub>2</sub>O<sub>2</sub> decontamination system respirator discard rate**

| Discard rate | Number of respirators required | Cost accumulated (USD)      | Waste generated (kg)        |
|--------------|--------------------------------|-----------------------------|-----------------------------|
| 10%          | 493 (465-520) million          | \$1.09 (1.07-1.11) billion  | 5.58 (5.27-5.89) million    |
| 30%          | 1.15 (1.09-1.21) billion       | \$1.65 (1.60-1.71) billion  | 13.03 (12.30-13.75) million |
| 50%          | 1.81 (1.71-1.91) billion       | \$2.22 (2.13 -2.31) billion | 20.47 (19.33-21.61) million |

**Supplementary Table 5 Sensitivity analysis: Maximum cycles of decontamination per respirator for H<sub>2</sub>O<sub>2</sub> decontamination system**

| Number cycles | Number of respirators required | Cost accumulated (USD)     | Waste generated (kg)        |
|---------------|--------------------------------|----------------------------|-----------------------------|
| 10            | 1.31 (1.24-1.39) billion       | \$1.80 (1.73-1.86) billion | 14.89 (14.06-15.71) million |
| 20            | 1.15 (1.09-1.21) billion       | \$1.65 (1.60-1.71) billion | 13.03 (12.30-13.75) million |

**Supplementary Table 6 Sensitivity analysis: UVGI decontamination strategy cost\***

| Parameter                                         | Value                      |
|---------------------------------------------------|----------------------------|
| Cost of 2 surgical suite UVGI system              | \$40,000.00                |
| Cost of repurposed or low tech UVGI lamp system   | \$50.00                    |
| <b>Results</b>                                    |                            |
| Base cost                                         | \$1.41 (1.33-1.49) billion |
| Base cost + cost of 2 surgical suite UVGI systems | \$1.42 (1.34-1.49) billion |

|                                                                 |                            |
|-----------------------------------------------------------------|----------------------------|
| Base cost + cost of repurposed or low tech UVGI lamp system     | \$1.41 (1.33-1.49) billion |
| *Assuming distribution across hypothetical 60 sites across U.S. |                            |

**Supplementary Table 7 Sensitivity analysis: UVGI decontamination system discard rate**

| Discard rate | Number of respirators required | Cost accumulated (USD)     | Waste generated (kg)        |
|--------------|--------------------------------|----------------------------|-----------------------------|
| 10%          | 986 (931-1040) million         | \$848 (800-895) million    | 11.17 (10.55-11.79) million |
| 30%          | 1.64 (1.55-1.73) billion       | \$1.41 (1.33-1.49) billion | 18.61 (17.58-19.64) million |
| 50%          | 2.30 (2.17-2.43) billion       | \$1.98 (1.87-2.09) billion | 26.05 (24.61-27.50) million |

**Supplementary Table 8 Sensitivity analysis: Maximum cycles of decontamination per respirator for UVGI decontamination system**

| Number cycles | Number of respirators required | Cost accumulated (USD)     | Waste generated (kg)        |
|---------------|--------------------------------|----------------------------|-----------------------------|
| 2             | 2.63 (2.48-2.77) billion       | \$2.26 (2.13-2.39) billion | 29.78 (28.12-31.43) million |
| 5             | 1.64 (1.55-1.73) billion       | \$1.41 (1.33-1.49) billion | 18.61 (17.58-19.64) million |

# BMJ Open

## Thinking green: Modelling respirator reuse strategies to reduce cost and waste

|                                 |                                                                                                                                                                                                                                                                                                                                                                                                                                                                                                                                                                                                                                                                                                                                                                                                                                                                                                                                                                                                                                                                                                                                                                                                                                                                                                                                                                                                                                                                                                                                                                                |
|---------------------------------|--------------------------------------------------------------------------------------------------------------------------------------------------------------------------------------------------------------------------------------------------------------------------------------------------------------------------------------------------------------------------------------------------------------------------------------------------------------------------------------------------------------------------------------------------------------------------------------------------------------------------------------------------------------------------------------------------------------------------------------------------------------------------------------------------------------------------------------------------------------------------------------------------------------------------------------------------------------------------------------------------------------------------------------------------------------------------------------------------------------------------------------------------------------------------------------------------------------------------------------------------------------------------------------------------------------------------------------------------------------------------------------------------------------------------------------------------------------------------------------------------------------------------------------------------------------------------------|
| Journal:                        | <i>BMJ Open</i>                                                                                                                                                                                                                                                                                                                                                                                                                                                                                                                                                                                                                                                                                                                                                                                                                                                                                                                                                                                                                                                                                                                                                                                                                                                                                                                                                                                                                                                                                                                                                                |
| Manuscript ID                   | bmjopen-2021-048687.R2                                                                                                                                                                                                                                                                                                                                                                                                                                                                                                                                                                                                                                                                                                                                                                                                                                                                                                                                                                                                                                                                                                                                                                                                                                                                                                                                                                                                                                                                                                                                                         |
| Article Type:                   | Original research                                                                                                                                                                                                                                                                                                                                                                                                                                                                                                                                                                                                                                                                                                                                                                                                                                                                                                                                                                                                                                                                                                                                                                                                                                                                                                                                                                                                                                                                                                                                                              |
| Date Submitted by the Author:   | 30-Jun-2021                                                                                                                                                                                                                                                                                                                                                                                                                                                                                                                                                                                                                                                                                                                                                                                                                                                                                                                                                                                                                                                                                                                                                                                                                                                                                                                                                                                                                                                                                                                                                                    |
| Complete List of Authors:       | <p>Chu, Jacqueline; Massachusetts General Hospital, Division of Gastroenterology, Harvard Medical School; Massachusetts Institute of Technology, Koch Institute for Integrative Cancer Research</p> <p>Ghenand, Omkar; Massachusetts Institute of Technology, The Undergraduate Research Opportunities Program</p> <p>Collins, Joy; Brigham and Women's Hospital, Division of Gastroenterology ; Massachusetts Institute of Technology, Koch Institute for Integrative Cancer Research</p> <p>Byrne, James; Massachusetts Institute of Technology, Koch Institute for Integrative Cancer Research ; Brigham and Women's Hospital, Harvard Radiation Oncology Program, Harvard Medical School</p> <p>Wentworth, Adam; Massachusetts Institute of Technology, Koch Institute for Integrative Cancer Research ; Brigham and Women's Hospital, Department of Gastroenterology</p> <p>Chai, Peter; Massachusetts Institute of Technology Koch Institute for Integrative Cancer Research; Brigham and Women's Hospital, Department of Emergency Medicine</p> <p>Dadabhoy, Farah; Massachusetts Institute of Technology, Koch Institute for Integrative Cancer Research ; Brigham and Women's Hospital, Department of Emergency Medicine</p> <p>Hur, Chin; Columbia University Medical Center, Department of Medicine ; Columbia University Medical Center, Department of Epidemiology</p> <p>Traverso, Giovanni; Brigham and Women's Hospital, Division of Gastroenterology, Harvard Medical School; Massachusetts Institute of Technology, Department of Mechanical Engineering</p> |
| <b>Primary Subject Heading</b>: | Health economics                                                                                                                                                                                                                                                                                                                                                                                                                                                                                                                                                                                                                                                                                                                                                                                                                                                                                                                                                                                                                                                                                                                                                                                                                                                                                                                                                                                                                                                                                                                                                               |
| Secondary Subject Heading:      | Health policy, Health services research, Infectious diseases, Public health                                                                                                                                                                                                                                                                                                                                                                                                                                                                                                                                                                                                                                                                                                                                                                                                                                                                                                                                                                                                                                                                                                                                                                                                                                                                                                                                                                                                                                                                                                    |
| Keywords:                       | COVID-19, Health economics < HEALTH SERVICES ADMINISTRATION & MANAGEMENT, HEALTH SERVICES ADMINISTRATION & MANAGEMENT, INFECTIOUS DISEASES                                                                                                                                                                                                                                                                                                                                                                                                                                                                                                                                                                                                                                                                                                                                                                                                                                                                                                                                                                                                                                                                                                                                                                                                                                                                                                                                                                                                                                     |
|                                 |                                                                                                                                                                                                                                                                                                                                                                                                                                                                                                                                                                                                                                                                                                                                                                                                                                                                                                                                                                                                                                                                                                                                                                                                                                                                                                                                                                                                                                                                                                                                                                                |

1  
2  
3  
4  
5  
6  
7  
8  
9  
10  
11  
12  
13  
14  
15  
16  
17  
18  
19  
20  
21  
22  
23  
24  
25  
26  
27  
28  
29  
30  
31  
32  
33  
34  
35  
36  
37  
38  
39  
40  
41  
42  
43  
44  
45  
46  
47  
48  
49  
50  
51  
52  
53  
54  
55  
56  
57  
58  
59  
60

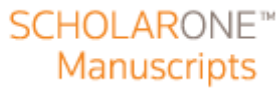





I, the Submitting Author has the right to grant and does grant on behalf of all authors of the Work (as defined in the below author licence), an exclusive licence and/or a non-exclusive licence for contributions from authors who are: i) UK Crown employees; ii) where BMJ has agreed a CC-BY licence shall apply, and/or iii) in accordance with the terms applicable for US Federal Government officers or employees acting as part of their official duties; on a worldwide, perpetual, irrevocable, royalty-free basis to BMJ Publishing Group Ltd ("BMJ") its licensees and where the relevant Journal is co-owned by BMJ to the co-owners of the Journal, to publish the Work in this journal and any other BMJ products and to exploit all rights, as set out in our [licence](#).

The Submitting Author accepts and understands that any supply made under these terms is made by BMJ to the Submitting Author unless you are acting as an employee on behalf of your employer or a postgraduate student of an affiliated institution which is paying any applicable article publishing charge ("APC") for Open Access articles. Where the Submitting Author wishes to make the Work available on an Open Access basis (and intends to pay the relevant APC), the terms of reuse of such Open Access shall be governed by a Creative Commons licence – details of these licences and which [Creative Commons](#) licence will apply to this Work are set out in our licence referred to above.

Other than as permitted in any relevant BMJ Author's Self Archiving Policies, I confirm this Work has not been accepted for publication elsewhere, is not being considered for publication elsewhere and does not duplicate material already published. I confirm all authors consent to publication of this Work and authorise the granting of this licence.

## Thinking green: Modelling respirator reuse strategies to reduce cost and waste

Jacqueline N. Chu, MD (1,2), Omkar Ghenand (3), Joy Collins, MPH (2,4), James Byrne, MD, PhD (2,5), Adam Wentworth, MS (2,4), Peter R Chai, MD MMS (2,6), Farah Dadabhoy, MD (2,6), Chin Hur, MD, MPH (7,8), Giovanni Traverso, MB, BChir, PhD\* (4,9)

1 Division of Gastroenterology, Massachusetts General Hospital, Harvard Medical School, Boston, MA 02114, USA.

2 David H. Koch Institute for Integrative Cancer Research, Massachusetts Institute of Technology, Cambridge, MA 02142, USA

3 The Undergraduate Research Opportunities Program, Massachusetts Institute of Technology, Cambridge, MA 02142, USA

4 Division of Gastroenterology, Brigham and Women's Hospital, Harvard Medical School, Boston, MA 02115, USA

5 Harvard Radiation Oncology Program, Brigham and Women's Hospital, Harvard Medical School, Boston, MA 02114, USA

6 Department of Emergency Medicine, Brigham and Women's Hospital

7 Department of Medicine, Columbia University Medical Center, New York, NY 10032, USA

8 Department of Epidemiology, Mailman School of Public Health and Herbert Irving Comprehensive Cancer Center, Columbia University Medical Center, New York, NY 10032, USA

9 Department of Mechanical Engineering, Massachusetts Institute of Technology, 77 Massachusetts Ave, Cambridge, MA 02139, USA

\*Correspondence to:

Giovanni Traverso MB, BChir, PhD  
Department of Mechanical Engineering, Massachusetts Institute of Technology, 77 Massachusetts Ave., 3-340, Cambridge, MA 02139  
Division of Gastroenterology, Brigham and Women's Hospital, 65 Landsdowne St, Suite 252, Cambridge, MA, 02139  
[ctraverso@bwh.harvard.edu](mailto:ctraverso@bwh.harvard.edu), [cgt20@mit.edu](mailto:cgt20@mit.edu)  
(o) 617-417-8061  
(f) 617-500-0631

Word Count: 5,081

**Abstract:**

**Objectives** To compare the impact of respirator extended use and reuse strategies with regard to cost and sustainability during the COVID-19 pandemic.

**Design** Cost analysis

**Setting** United States

**Participants** All healthcare workers within the United States

**Interventions** Not applicable

**Main outcome measures** A model was developed to estimate usage, costs, and waste incurred by several respirator usage strategies over the first 6-months of the pandemic in the United States. This model assumed universal masking of all healthcare workers. Estimates were taken from the literature, government databases, and commercially available data from approved vendors.

**Results** A new N95 respirator per patient encounter would require 7.41 billion respirators, cost \$6.38 billion, and generate 84.0 million kg of waste in the U.S. over 6 months. One respirator per day per healthcare worker would require 3.29 billion respirators, \$2.83 billion, and 37.22 million kg of waste. Decontamination by ultraviolet germicidal irradiation would require 1.64 billion respirators, \$1.41 billion, and accumulate 18.61 million kg of waste. H<sub>2</sub>O<sub>2</sub> vapor decontamination would require 1.15 billion respirators, \$1.65 billion, and produce 13.03 million kg of waste. One reusable respirator with daily disposable filters would require 18 million respirators, cost \$1.24 billion, and generate 15.73 million kg of waste. Pairing a reusable respirator with H<sub>2</sub>O<sub>2</sub> vapor-decontaminatable filters would reduce cost to \$831 million and generate 1.58 million kg of waste. The use of one surgical mask per healthcare worker per day would require 3.29 billion masks, cost \$460 million, and generate 27.92 million kg of waste.

**Conclusions** Decontamination-and reusable respirator-based strategies decreased the number of respirators used, costs, and waste generated compared to single- or daily extended-use of disposable respirators. Future development of low-cost, low-tech technologies to enable respirator and/or filter decontamination is needed to further minimize the economic and environmental costs of masks.

**Trial registration** Not applicable

**Keywords** Covid-19, environmental health, health economics

**Strengths and limitations of this study**

- Describes the current economic and environmental impact of several mask reuse strategies on a national scale among healthcare workers.
- Estimates cost and waste specific to respirator use in order to meet the demands of COVID-19.
- Explores respirator reuse strategies to reduce the economic and environmental toll during COVID-19 and beyond.
- Only a few respirator strategies and decontamination methods are evaluated in this study.
- Conducted from a US perspective only; parameters are not applicable to other countries and did not include ancillary costs.

## Introduction

The COVID-19 pandemic has led to personal protective equipment (PPE) shortages worldwide, including shortage of N95 respirators and surgical masks.[1-3] In order to maximize resources, many hospitals have adopted extended use of masks or decontamination and reuse strategies, particularly of N95 respirators.[1 ,4 ,5] Prior to the pandemic, a new N95 respirator was typically used for each patient encounter and then discarded.[5 ,6] In light of the PPE shortage, some hospitals have now moved to using one respirator per several encounters or even several days.[4 ,6] Decontamination strategies such as hydrogen peroxide vapor (H<sub>2</sub>O<sub>2</sub>) and ultraviolet germicidal irradiation (UVGI) are being adopted and thus far appear effective, but concerns about decontamination reducing mask fit and integrity remain, as well as concerns regarding cost of the technology.[5-9]

The United States government awarded a \$415 million contract to Battelle in April 2020 to deploy 60 hydrogen peroxide vapor decontamination sites across the country.[6 ,7] While this may be feasible in resource-rich settings, the hydrogen peroxide system requires significant infrastructure and trained personnel, limiting its translation to resource-constrained areas.[7 ,9] There is therefore a need for simpler methods of respirator decontamination that can be deployed on a large scale.[10] Investigations into heat, steam, and detergent decontamination are ongoing; however, these have thus far been shown to compromise mask integrity.[3 ,5] Nebraska Medicine piloted a UVGI system that has been approved by the United States Centers for Disease Control and Prevention (CDC), which may be easier to deploy for hospitals that already have UV decontamination systems in place.[11]

Reusable respirators designed for prolonged use such as half-mask elastomeric respirators are available but have not been heavily adopted due to challenges with sterilization, cost, and bulky size.[10] Several scalable, less expensive reusable respirators have been recently developed that can be easier to decontaminate using standard hospital equipment to try to address the respirator shortage.[10 ,12] The Pneumask project for example, which repurposes snorkel masks, has already distributed more than 23,000 masks internationally.[12-15] Other types of reusable masks that aim to address barriers to communication, such as the Jelli M1 mask [16] and ClearMask, have recently been developed.[17] Potential benefits of reusable respirators compared to disposable respirators could include reduced cost and waste. The use of innovative filtration techniques and antimicrobial nanoparticles could also reduce viral spread, and when incorporated into reusable respirators, reduce cost and waste even further.[18] Introducing novel mask types, such as a variety of reusable masks, presents an opportunity to diversify the market, and in turn provide more flexibility within supply chains. This has the potential to increase efficiency and reduce cost, waste, and energy consumption associated with supply chain disruption.[19]

The global increase in the use of plastics for mask and PPE production has drastically increased medical waste, with countries such as Spain and China reporting increases of 350% and 370%, respectively.[20 ,21] As of February 2020, the production rate of face masks in China alone increased by 12 fold.[22 ,23] Rough estimates have shown the COVID-19 pandemic could generate up to 7,200 tons a day in medical waste, a sizable portion of which comes from masks.[21 ,24] A reusable respirator could be a more sustainable alternative to disposable respirators, particularly if respirator and mask usage becomes more commonplace post-pandemic, such as in Asia. [25-27] Already environmentalists have noted a surge in plastic pollution from discarded masks in the ocean and continued heavy use of disposable PPE is unlikely to be sustainable.[21 ,24 ,28]

The optimal respirator use strategy that maximizes supply, minimizes cost, and minimizes waste is unknown. This analysis estimates respirator use, cost, and waste generation in the United States over the course of the first six months of the COVID-19 pandemic to explore the optimal strategy for respirator use. For the purpose of this study, we used the following terms to describe the different respirator use and reuse strategies: single use refers to the use of one disposable respirator per patient encounter, followed by disposal; extended use refers to extended use of a disposable respirator for an entire day, followed by disposal; and reuse refers to strategies to decontaminate respirators or use of non-disposable respirators longer-term.

## Methods

### *Data sources*

We estimated respirator usage, cost and waste from late March 2020 to late September 2020. The input parameters for the model are found in Tables 1-3. Data was sourced and adapted from the scientific literature or national

databases. Base case respirator cost and waste estimates used the 3M 1860 disposable respirator as well as a recently published reusable respirator.[10], [29]

**Table 1 Parameters used to estimate respirator usage, costs, and waste generation**

| Parameter                                                                                                                                      | Value                                                   | Reference |
|------------------------------------------------------------------------------------------------------------------------------------------------|---------------------------------------------------------|-----------|
| US Population as of 2019                                                                                                                       | 328.2 million                                           | [30]      |
| Total number of healthcare and frontline workers in US as of 2020                                                                              | 18 (17-19) million                                      | [31-33]   |
| Weight of one 3M 1860 N95 respirator                                                                                                           | 11.3 g                                                  | [29]      |
| Weight of one 3-ply disposable personal protective (PPE-100-50) surgical mask                                                                  | 8.5 g                                                   | [34]      |
| Total cost of assembled reusable Transparent Elastomeric Adaptable Long-Lasting (TEAL) respirator, minus filters                               | \$6.11 USD (\$4.42 GBP; \$5.20 Euro)                    | [10]      |
| Weight of one TEAL reusable respirator                                                                                                         | 46.5 g                                                  | [10]      |
| Weight of one reusable respirator filter                                                                                                       | 2.26 g                                                  | [10]      |
| Cost of one pair of filters required per reusable respirator                                                                                   | \$0.34 USD (\$0.25 GBP; \$0.29 Euro)                    | [10]      |
| Cost of one 3-ply surgical mask (Fluidshield Level 1)                                                                                          | \$0.14 USD (\$0.10 GBP; \$0.12 Euro)                    | [35]      |
| Cost of one 3M 1860 N95 respirator                                                                                                             | \$0.86 USD (\$0.62 GBP; \$0.73 Euro)                    | [36]      |
| Cost of the National Battelle System funded by the FDA                                                                                         | \$415 million USD (\$300.23 million GBP; \$352.93 Euro) | [6]       |
| Reduction in the number of respirators required for HCW population in the US by the use of H <sub>2</sub> O <sub>2</sub> vapor decontamination | 20-fold                                                 | [6]       |
| Reduction in the number of respirators required for HCW population in the US by the use of UVGI                                                | 5-fold                                                  | [11]      |

### *Respirator usage*

We considered seven respirator usage strategies: one disposable respirator per patient encounter (single-use respirators), extended use of one disposable respirator per healthcare worker (HCW) per day, reuse of one respirator per HCW per day enabled by daily UVGI decontamination, reuse of one disposable respirator per HCW per day enabled by daily H<sub>2</sub>O<sub>2</sub> vapor decontamination, one reusable respirator with disposable filters per HCW, one reusable respirator with H<sub>2</sub>O<sub>2</sub> vapor-decontaminated filters per HCW, and one disposable surgical mask per HCW per day. We assumed that HCWs would be masked for all patient encounters (universal masking) given limited access to rapid COVID-19 testing nationally.[37-39] For the H<sub>2</sub>O<sub>2</sub> and UVGI decontamination strategies, we accounted for a 30% respirator discard rate due to soiled or damaged respirators as has previously been reported.[40] For each usage strategy, we considered low, average and high estimates for the size of the HCW population (17-19 million) based on estimates from the CDC, the Bureau of Labor Statistics, and published literature.[31-33]

For the one respirator per patient encounter strategy, we estimated respirators required by HCWs with exposure to patients and those without. The number of respirators required for HCWs due to patient contact was based on the

number of hospitalized patients (COVID and non-COVID), average length of stay (LOS), and average number of visits from HCWs per day (Table 2).[31] Data for the number of respirators required per patient per day, LOS per patient, and the number of ICU and hospital admissions was extracted from the recent COVID-19 literature, government reports, and a previous influenza study estimating respirator usage to prevent aerosol transmission.[31 ,41-44] To estimate the number of overall hospitalized patients, we incorporated drops in hospital admission rates due to the pandemic, which were as high as 42.8% below usual rates of admissions in April, 2020 before rebounding down to 15.9% below usual rates in June/July, 2020.[45] In addition, HCWs with patient contact were estimated to be using 4 respirators per day in between direct patient care.[31 ,46] HCWs without patient contact were assumed to be using 1 respirator per day given universal masking (Table 3).

**Table 2 Hospitalization-specific parameters used to estimate number of respirators required by the one respirator per patient encounter strategy over 6-months**

| Parameter                                                                          | Total      | Reference |
|------------------------------------------------------------------------------------|------------|-----------|
| Number of hospital admissions                                                      | 14,227,773 | [47]      |
| Number of patients admitted to the general ward                                    | 12,583,927 | [41 ,47]  |
| Number of patients admitted to the ICU                                             | 1,643,846  | [41 ,47]  |
| Number of hospitalizations due to COVID-19                                         | 396,355    | [45]      |
| Average length of stay for general ward patients                                   | 4.6 days   | [42]      |
| Average length of stay for patients admitted to the ICU                            | 3.3 days   | [42]      |
| Median length of stay for non-ICU COVID-19 patients                                | 10.1 days  | [44]      |
| Median length of stay for COVID-19 patients admitted to the ICU                    | 10.5 days  | [44]      |
| Number of respirators required per day for interactions with general ward patients | 8          | [31]      |
| Number of respirators required per day for interactions with ICU patients          | 14 (12-16) | [31]      |

**Table 3 HCW-specific parameters used to estimate number of respirators required by the one respirator per patient encounter strategy**

| Parameter                                               | Total     | Number of workers w/ patient contact | Number of workers w/o patient contact | Reference |
|---------------------------------------------------------|-----------|--------------------------------------|---------------------------------------|-----------|
| Number of nursing home workers                          | 3,427,000 | 856,750                              | 2,570,250                             | [31]      |
| Number of emergency medicine service workers            | 297,000   | 267,300                              | 29,700                                | [31]      |
| Number of emergency department workers                  | 132,000   | 132,000                              | 0                                     | [31]      |
| Number of hospital workers                              | 6,053,000 | 1,997,490                            | 4,055,510                             | [31]      |
| Number of outpatient workers                            | 3,206,000 | 2,148,020                            | 1,057,980                             | [31]      |
| Number of other healthcare workers in other occupations | 6,000,000 | 0                                    | 6,000,000                             | [31 ,32]  |

We then used these results to infer estimates for extended use and reuse of respirators enabled by the alternate respirator strategies. For our one disposable respirator per HCW per day strategy, we assumed that each HCW (with or without patient contact) would use one, new respirator per day.

For the daily H<sub>2</sub>O<sub>2</sub> vapor decontamination strategy, using currently available data on respirator integrity and efficiency after multiple cycles of H<sub>2</sub>O<sub>2</sub> vapor decontamination, we assumed that a respirator could be decontaminated for up to 20 cycles, with a 30% discard rate per day due to damaged or visibly soiled respirators after each cycle of decontamination.[40] Therefore, to form our estimates for H<sub>2</sub>O<sub>2</sub> vapor decontamination-enabled reuse of respirators, we divided the one respirator per HCW worker per day usage estimates by 20 and assumed 30% of respirators would need to be replaced after each decontamination cycle/per day to account for the estimated discard rate. Given uncertainty regarding discard rates and consistency in maximum number of cycles of

decontamination nationally, we performed sensitivity analyses using 10% and 50% discard rates as well as a maximum of 10 cycles of H<sub>2</sub>O<sub>2</sub> decontamination per respirator.

To model usage estimates for reuse of respirators enabled by daily UVGI decontamination, we used currently available data on respirator integrity and efficiency after multiple cycles of UVGI. Based on these estimates, we assumed that a respirator could be decontaminated for up to 5 cycles.[48] Therefore, to form our estimates for UVGI-enabled reuse of respirators, we divided the one respirator per healthcare worker per day usage estimates by 5 and assumed 30% of respirators would need to be replaced after each decontamination cycle/per day due to the estimated discard rate.[40 ,49 ,50] Given uncertainty regarding discard rates and consistency in maximum number of cycles of decontamination nationally, we performed sensitivity analyses using 10% and 50% discard rates as well as a maximum of 2 cycles of UVGI decontamination per respirator.

For the reusable respirators with disposable or H<sub>2</sub>O<sub>2</sub> vapor-decontaminated filter strategies, we assumed that every healthcare worker in the US will use one reusable respirator and replace or decontaminate the filters daily. Based on a recently published low-cost reusable respirator, we estimated costs and waste from a pair of filters to be approximately 2/5 of the cost and waste generated from an N95 respirator.[10] If filters were to be decontaminated using H<sub>2</sub>O<sub>2</sub> vapor, we also assumed that filters could be reused for a maximum of 20 days (20 decontamination cycles).

#### *Cost estimate*

To estimate the cost accumulated by each usage method, we used the following costs, which were found in the literature and converted to 2020 US dollars: 3M respirator, \$0.86 (converted from \$0.79 USD 2014 to 2020 USD), multiplied by the number of respirators required; [36] one surgical mask, \$0.14, multiplied by the number of surgical masks required;[35] reusable respirator, \$6.11, multiplied by the number of reusable respirators required;[10] a pair of filters for reusable respirators, \$0.34, multiplied by the number of pairs of filters required; and nationally distributed H<sub>2</sub>O<sub>2</sub> vapor decontamination systems across 60 sites, \$415 million.[6] Due to variation in implementation and maintenance costs for Battelle H<sub>2</sub>O<sub>2</sub> vapor decontamination systems across sites, it was difficult to estimate exact costs.[51] We performed a sensitivity analysis to estimate lower and upper-bound costs based on data from the Battelle decontamination center in Somerville, MA and added them to the total cost of the respirators themselves. This decontamination center is capable of decontaminating 80,000 respirators per day and servicing up to roughly 157 hospitals. There are currently 6,090 hospitals across the United States.[47] For the lower bound, we estimated that if each site were able to service 157 hospitals, this would require approximately 39 decontamination centers and only 65% of the 415 million dollars to fund 60 sites across the United States. For the upper bound, we used a decontamination cost per respirator of \$3.25 and multiplied that by the respirator usage required for the first 6 months of the pandemic.[52] We performed the sensitivity analysis varying different parameters for the upper and lower bounds in order to test the widest range for the cost of the H<sub>2</sub>O<sub>2</sub> decontamination strategy. In addition, we estimated the shipping costs from a large academic hospital here in Boston, MA (Massachusetts General Hospital) to the local Battelle decontamination center in Somerville, MA. The shipping costs for one day per each hospital were estimated to be \$114 to and from the site (for a total of \$228 in shipping costs; based on the estimated weight of 25 lbs. for shipping 1,000 masks over a distance of roughly 3.5 miles).[53] We scaled this cost by the number of hospitals and Battelle sites across the United States over the course of the first 6 months of the pandemic and arrived at a total nation-wide shipping cost of \$250 million. We added this to the overall costs for lower, base-case, and upper bound costs. For the cost of the UVGI system, we assumed the base-case cost of the UVGI system to only include the cost of the respirators required as the literature suggests that UV systems are more readily available on site in many hospitals in comparison to H<sub>2</sub>O<sub>2</sub> vapor decontamination systems. [39] This may be because UV systems require significantly less space and personnel than H<sub>2</sub>O<sub>2</sub> vapor decontamination systems.[40] However, we also performed a sensitivity analysis to account for the varying costs and sophistication of UVGI systems, ranging from the installation of a brand new, high volume system [11] to a less expensive, lower volume system that utilizes repurposed materials.[9 ,54] In addition, we explored a range of UVGI system costs which do not include installation, maintenance, distribution, energy, or personnel costs.[9 ,11 ,48 ,54 ,55] We also estimated the average cost generated per patient for each strategy by dividing the total cost by the total number of hospitalized COVID-19 patients during the first 6 months of the pandemic.

#### *Waste estimate*

Waste estimates for each usage method measured the mass of the total respirators, surgical masks, and filters used and disposed of through the 6-month duration. The mass of 3M's 1860 respirator, a standard surgical mask, and a

reusable respirator are 11.3 grams, 8.5 grams and 46.5 grams, respectively [10,29,34]. Single filters for reusable respirators were estimated using  $\frac{1}{5}$  of a respirator (2.26 grams per a single filter, 4.53 grams per pair of filters).[10,29] Thus, to form our waste estimates, we multiplied respirator, surgical mask and reusable respirator usage by their respective masses. We estimated the average waste generated per patient for each strategy by dividing the total amount of waste by the total number of hospitalized COVID-19 patients during the first 6 months of the pandemic. We also performed an additional sensitivity analyses using an alternate disposable respirator.

#### *Ethics Approval Statement*

This study did not require ethics approval as it did not involve human participants.

#### *Patient and Public Involvement*

Patients or the public were not involved in the design, or conduct, or reporting, or dissemination plans of our research. It was not appropriate or possible to involve patients or the public in the design, or conduct, or reporting, or dissemination plans of our research.

## **Results**

#### *Mask usage*

The estimated numbers of respirators required in the United States for each strategy are shown in Table 4 and Figure 1A. The use of a new respirator per patient encounter in the U.S. would require 7.41 billion respirators. An extended-use strategy of one respirator per day per HCW would reduce need by over 50% to 3.29 billion respirators. Decontamination by UVGI would further reduce the need to 1.64 billion respirators. Employing a H<sub>2</sub>O<sub>2</sub> vapor decontamination strategy would further reduce need by 84% to only 1.15 billion respirators. A reusable respirator strategy (with either disposable or decontaminated filters), where one respirator is assigned to each HCW for the duration of the pandemic, would further reduce need to approximately 18 million respirators, for a total reduction in respirator need by over 99%. Using a new surgical mask daily would require 3.29 billion surgical masks.

#### *Cost estimate*

The estimated costs for each respirator use strategy are summarized in Table 4 and Figure 1B. The use of a new respirator per patient per HCW would cost an average of \$6.38 billion (\$16.09 thousand (k) per patient). Extended use of one respirator per day would reduce the cost to \$2.83 billion (\$7.13k per patient), saving approximately \$3.55 billion. The H<sub>2</sub>O<sub>2</sub> vapor decontamination strategy would reduce cost to \$1.65 billion (\$4.17k per patient), saving approximately 1.18 billion, though sensitivity analyses estimated the cost of the H<sub>2</sub>O<sub>2</sub> decontamination system could vary between \$1.51-\$4.98 billion (Supplementary Table 1). The decontamination by UVGI strategy would reduce the cost to \$1.41 billion (\$3.56k per patient), saving an additional \$24 million. A reusable respirator with disposable filters would cost \$1.24 billion (\$3.13k per patient), though this is almost entirely filter costs (\$1.13 billion). A reusable respirator with a decontaminated filter and surgical mask strategies would be the least costly strategies at \$831 million dollars and \$460 million dollars (\$2.10k and \$1.16k per patient, respectively), which is a total cost savings of over \$5.54 billion (Figure 1B). This is more than the amount of money provided by the CARES Act to support the CDC's pandemic response efforts and programs.[56]

#### *Waste estimate*

The estimated waste generated by each respirator use strategy is summarized in Table 4 and Figure 1C-D. The use of a new respirator per patient encounter per HCW would generate 84.0 million kg of waste (211.93 kg of waste per patient). Extended use of one respirator per day would reduce waste to 37.22 million kg (93.90 kg per patient). The decontamination by UVGI strategy would reduce waste to 18.61 million kg (46.95 kg per patient). A H<sub>2</sub>O<sub>2</sub> vapor decontamination (with a 30% discard rate) strategy would reduce waste to 13.03 million kg (32.87 kg per patient). A reusable respirator with disposable filters would generate 15.73 million kg of waste (14.88 million kg from filters, 39.68 kg total per patient). Pairing the reusable respirator with a decontaminated filter would significantly reduce generated waste to 1.58 million kg (3.99 kg per patient), for an overall reduction in waste generation by approximately 82.42 million kg, equivalent to going from a mass of 252 Boeing 747 airplanes to five (Figure 1D). The surgical mask strategy would generate 27.92 million kg of waste (70.45 kg per patient).

#### *Sensitivity analyses*



A sensitivity analysis of a larger commonly used disposable respirator (Gerson 1730) did not significantly change the estimated cost of the strategies or relative amounts of waste generation (Supplementary Table 2). An additional sensitivity analysis was conducted looking at a different 3M disposable respirator cost found from the commercial manufacturer 3M to account for variability in market costs (\$1.27/respirator). The cost variation did not change the relative rankings of the reuse strategies (Supplementary Table 3).[36 ,57] Cost and waste estimates for commercially available reusable half-facepiece elastomeric respirators (3M 7500 series) with P100 filters (assuming that each HCW uses one pair of filters per week) were also explored (Supplementary Table 4)[58-61]. Low and high cost estimates of \$2.02 and \$2.26 billion were calculated using sources from the commercial manufacturer 3M,[58] with reusable respirator costs ranging from \$25 to \$45 per respirator with a single disposable P100 filter cost of \$7.00.[59] These cost estimates of \$2.02-\$2.26 billion were lower than the one respirator per day reuse strategy, but higher than the H<sub>2</sub>O<sub>2</sub> decontamination, UVGI decontamination, reusable respirator, reusable respirator with decontaminated filters, and surgical mask strategies (Table 4, Supplementary Table 4). Low and high waste estimates of 3.22 million kg and 3.59 million kg were calculated using a respirator weight of 135 grams and filter weight of 4.54 grams (Supplementary Table 4). These waste estimates were lower than the one per day reuse strategy, H<sub>2</sub>O<sub>2</sub> decontamination, UVGI, reusable respirator, and surgical mask strategies, but higher than the reusable respirator with decontaminated filters strategy (Table 4, Supplementary Table 4).

A sensitivity analysis of the H<sub>2</sub>O<sub>2</sub> decontamination system costs estimated a range of \$1.51-\$4.98 billion, with variation in cost driven by differing estimates in the number of decontamination centers required to service all of the hospitals in the United States and in the cost of the decontamination per mask (Supplementary Table 1).

Sensitivity analyses of respirator discard rates and maximum cycles of H<sub>2</sub>O<sub>2</sub> decontamination found that a 10% discard rate lowered respirator usage, cost, and waste generation by 657 million respirators, \$560 million, and 7.45 million kg, respectively. A 50% discard rate would increase respirator usage, cost and waste generation by 660 million respirators, \$570 million, and 7.44 million kg, respectively. Lowering maximum decontamination to 10 cycles increased respirator usage, cost and waste generation by 160 million respirators, \$150 million, and 1.86 million kg, respectively (Supplementary Tables 5-6).

A sensitivity analysis of the UVGI decontamination system costs estimated a range of \$1.41-1.42 billion, even accounting for variations in sophistication of technology installed (Supplementary Table 7). Sensitivity analyses of respirator discard rates and maximum cycles of UVGI decontamination found that a 10% discard rate reduced respirator usage, cost, and waste generation by 654 million respirators, \$560 million, and 7.44 million kg, respectively. A 50% discard rate increased respirator usage, cost and waste generation by 660 million respirators, \$570 million, and 7.44 million kg, respectively. Lowering maximum decontamination to 2 cycles increased respirator usage, cost, and waste generation by 990 million respirators, \$850 million, and 11.17 million kg, respectively (Supplementary Tables 8-9).

**Table 4 Numbers of respirators, cost accumulated, and waste generated per strategy over a duration of 6-months per base, low, and high number of estimated HCWs**

| Respirator strategy                                                  | Number of respirators required | Cost accumulated (USD)     | Cost accumulated (USD) per patient | Waste generated (kg)        | Waste generated (kg) per patient |
|----------------------------------------------------------------------|--------------------------------|----------------------------|------------------------------------|-----------------------------|----------------------------------|
| 1 per patient encounter                                              | 7.41 (7.22-7.59) billion       | \$6.38 (6.21-6.52) billion | \$16.09 (15.67-16.46) thousand     | 84.0 (81.79-85.96) million  | 211.94 (206.38-216.88)           |
| 1 per day                                                            | 3.29 (3.10-3.47) billion       | \$2.83 (2.67-2.98) billion | \$7.13 (6.73-7.52) thousand        | 37.22 (35.15-39.29) million | 93.90 (88.69-99.12)              |
| UVGI-decontaminated 3M 1860 N95 respirators                          | 1.64 (1.55-1.73) billion       | \$1.41 (1.33-1.49) billion | \$3.56 (3.37-3.76) thousand        | 18.61 (17.58-19.64) million | 46.95(44.34-49.56)               |
| H <sub>2</sub> O <sub>2</sub> decontaminated 3M 1860 N95 respirators | 1.15 (1.09-1.21) billion       | \$1.65 (1.60-1.71) billion | \$4.17 (4.03-4.31) thousand        | 13.03 (12.30-13.75) million | 32.87 (31.04-34.69)              |
| Reusable TEAL respirator + disposable filters                        | 0.018 (0.017-0.019) billion    | \$1.24 (1.17-1.31) billion | \$3.13 (2.96-3.30) thousand        | 15.73 (14.85-16.60) million | 39.68 (37.47-41.88)              |

|                                                   |                                           |                                |                              |                             |                      |
|---------------------------------------------------|-------------------------------------------|--------------------------------|------------------------------|-----------------------------|----------------------|
| Reusable TEAL respirator + decontaminated filters | 0.018 (0.017-0.019) billion               | \$0.831 (0.822 -0.841) billion | \$2.10 (2.07 -2.12) thousand | 1.58 (1.49-1.67) million    | 3.99 (3.77-4.21)     |
| Surgical mask, 1 per day                          | 3.29 (3.10-3.47) billion (surgical masks) | \$0.460 (0.434-0.485) billion  | \$1.16 (1.10-1.23) thousand  | 27.92 (26.37-29.47) million | 70.45 (66.53 -74.36) |

## Discussion

### *Principal findings*

The COVID-19 pandemic has dramatically increased the demand for respirators across the world, leading to supply shortages, spending in the billions of dollars, and generation of large amounts of medical waste. Even after widespread vaccination efforts, masks will likely continue to be required due to factors such as variable vaccine uptake, incomplete vaccinations, lack of knowledge as to who has received a vaccine, the possibility of reinfection, and unclear duration of vaccination efficacy.[62 ,63] Additionally, even after the pandemic, respirator and mask usage both in healthcare settings and among the general public may persist.[64] The continued use of disposable respirators and masks is unlikely to be sustainable and will have significant environmental consequences.[21] With this in mind, it is critical to understand the best strategy to maximize respirator and mask availability while minimizing costs and waste generation.

Of the strategies compared, we find that all reuse strategies (UVGI decontamination, H<sub>2</sub>O<sub>2</sub> vapor decontamination, reusable respirators with disposable filters, or reusable respirators with decontaminated filters), could significantly decrease the number of respirators required compared to single- or extended-use mask strategies by at least 1.65 billion respirators in the United States alone. This would greatly increase availability and access of respirators worldwide. In addition, reuse strategies could save at least \$1.18 billion dollars in costs nationally over the course of the pandemic. Finally, reuse strategies significantly reduce waste generation in the United States by at least 18.61 million kg. These estimates from our study only capture the economic and environmental impact over the first six months of the COVID-19 pandemic in the US and suggest that the long-term and global impact of reuse strategies are even higher, especially when considering respirators and masks used by the general population.

Our analyses found that UVGI decontamination, H<sub>2</sub>O<sub>2</sub> vapor decontamination, and reusable respirators with disposable filters were similar in cost and waste generation. Combining the strategies by utilizing a reusable respirator with either H<sub>2</sub>O<sub>2</sub> vapor-decontaminated filters was the least costly of all strategies compared and generated the least amount of waste. This finding suggests that even with UVGI and H<sub>2</sub>O<sub>2</sub> vapor decontamination strategies, the adoption of a reusable respirator can have a significant impact in both cost and waste generation, though additional studies are needed to estimate the impact of additional costs, such as shipping to shared decontamination sites, installation costs, and time associated with decontamination or cleaning methods. Additional investigation is needed to capture other potential costs and benefits related to each mask-reuse strategy.

In settings where UVGI or H<sub>2</sub>O<sub>2</sub> vapor decontamination are not feasible, such as in resource-constrained settings where installation and maintenance of such systems are challenging, reusable respirators with disposable filters may be preferable to disposable respirators. These respirators may also be decontaminated with standard hospital equipment such as alcohol and bleach wipes, which may be more readily available in settings with limited resources.[10 ,12] Anticipatory investment in a reusable respirator may not only provide access to high-quality PPE for COVID-19 in such settings but reduce overall waste and injury to our environment. Development of technologies to facilitate decontamination of respirators and/or filters that do not require special equipment, training, or infrastructure could even further reduce costs and waste as in the reusable respirator with decontaminated filters strategy.

### *Limitations*

One potential limitation of our study is the assumption that all respirator strategies discussed are equally effective at protecting the user. The decision to employ decontamination methods for reuse should be weighed against the possibility for greater health risks incurred by incomplete decontamination or lowered respirator efficacy, which may incur additional costs. The CDC recommended extended respirator use and reuse strategies for N95 respirators if respirators maintained their fit and function after decontamination.[65] Several studies have evaluated the effect of extended use and re-use strategies that require multiple donning on the fit and efficacy of N95 respirators independent of decontamination. One study found that 48% of subjects failed a fit test after only one redonning of

1  
2  
3 an N95 respirator. Additionally, another study found that among test subjects experienced in respirator donning,  
4 consecutively donning the same respirator 5 times was the threshold before mask-fit dropped below 100%.[66]  
5 Furthermore, both UVGI and H<sub>2</sub>O<sub>2</sub> decontamination methods have shown to reduce filtration and mask performance  
6 after 3 rounds of decontamination in some studies.[67] Therefore, it is important to note that the efficacy of each  
7 reuse strategy may not be not equal and should be considered prior to implementation. Potential costs related to  
8 unequal respirator efficiency and protection were not estimated in our analysis.  
9

10 An additional limitation of our study is that we modelled one strategy for all HCWs, regardless of frequency and  
11 type of patient contact. For HCWs at low risk of contact with bodily fluids (including respiratory droplets), it may be  
12 possible to deploy alternate strategies such as extended use of disposable respirators or less frequent  
13 decontamination. This could potentially further reduce cost and waste and increase respirator availability without  
14 sacrificing protection.  
15

16 We estimated only a few respirator strategies and decontamination methods, and other methods for extended  
17 respirator use and reuse across the world were not captured in our analysis. Furthermore, our estimates were  
18 performed from a US perspective, and these numbers will be different for other countries depending on parameters  
19 such as number of healthcare workers, rates of infection, and number of hospitalized patients, though we suspect  
20 that the relative benefit of reuse strategies compared to single- or extended-use respirator strategies will persist.  
21 Additionally, the number of COVID-19 hospitalizations were likely underestimated in this study, as only two-thirds  
22 of states and territories in the United States have reported this data during the COVID-19 pandemic; however, we  
23 suspect that this therefore underestimates the potential impact of mask reuse strategies.[46] Furthermore, our cost  
24 estimates did not include installation, maintenance, distribution, or personnel costs associated with various  
25 strategies, and additional studies should be performed. In addition, our analysis measured only the waste generated  
26 by masks themselves and did not study the environmental impact of manufacturing, packaging or waste generation  
27 from decontamination processes, which some studies estimate could generate up to 90% of greenhouse gas  
28 emissions.[19 ,68] Furthermore, the environmental impact of single-use plastics generated from packaging related to  
29 mask use, estimated to have increased by up to 40% during the pandemic, may contribute a significant amount of  
30 additional environmental waste.[69] These aspects were not included in our analyses and require further  
31 quantification. Finally, our estimates for the reusable respirator strategy was based on a recently published  
32 prototype.[10] Updated analyses should be performed as these and other low-cost reusable respirators and masks  
33 become more available.[12 ,70]

### 34 *Implications and future research*

35 While our analysis measured the economic and environmental impact of several mask reuse strategies, there are  
36 several areas of investigation that may contribute to further reductions in cost and environmental impact. For  
37 example, our analysis highlighted the importance of considering not only reusable respirators, but reusable or  
38 decontaminatable filters, as these drove the cost and waste of reusable respirator/disposable filter strategies.  
39 Inexpensive, low-tech methods for filter decontamination are needed. Alternatively, redesign of reusable respirators  
40 to require smaller filters or development of fully reusable respirators would greatly reduce cost, waste and  
41 potentially the need for single-use plastics. Additionally, the development of novel materials for masks to increase  
42 durability of these systems after repeated exposures to H<sub>2</sub>O<sub>2</sub> vapor or other decontamination techniques may  
43 increase the lifespan of masks and decrease the volume of masks used. Incorporation of bactericidal or antiviral  
44 agents, nanoparticles, or nanotechnology into masks may also increase their reusability and potentially decrease the  
45 need for cleaning agents in regions where there may be concomitant shortages of these solutions. Antimicrobial  
46 agents derived from natural products (tea tree oil, grapefruit seed extract, etc.) as well as nanoparticles (NPs) from  
47 different metals and metal compounds (copper, silver, zinc oxide, etc.) have also been shown to improve filtration  
48 and reduce viral load on mask surfaces.[14 ,15] There are a variety of masks now commercially available that use  
49 nanotechnology and range from disposable surgical masks, washable masks, and reusable respirators such as  
50 Innonix RespoKare (citric acid NPs), Cupron Inc. (copper NPs), and Argaman BioBlockX™ (silver NPs).[14 ,15  
51 ,18] These strategies may also decrease waste of common hospital-based wipes used to decontaminate masks, which  
52 was not included in this analysis. Finally, the development of biodegradable or recyclable materials that provide  
53 efficient particle protection may minimize the environmental effects of discarded masks.

54 Our analysis raises key questions for stakeholders regarding the optimal strategy to both provide sufficient  
55 protection for healthcare workers and patients while also assuring equitable access to PPE and reducing  
56 environmental harm. Given our findings that reusable respirator strategies greatly reduce the number of respirators  
57  
58  
59  
60

required and medical waste generated, it is interesting that reusable respirators or decontamination strategies have largely not been adopted in the US prior to the COVID-19 pandemic. We hypothesize that this could be due to a number of reasons including cost and availability of reusable respirators, lack of recognition of the scale of medical waste and its impact on the environment, and individual healthcare systems' lack of accountability with regard to medical waste. We have reason to believe that the first two reasons will be addressed over the course of the pandemic. Given renewed interest in new technologies for PPE, we expect options and availability for reusable respirators to continue to expand.[15] We believe our study as well as others will increase public awareness of the environmental impact of disposable PPE, particularly masks.[38 ,69] In order to improve hospital system accountability over medical waste, however, we may need to turn to policymakers to consider nationwide incentives such as subsidies to transition to reusable PPE, taxes to offset medical waste generation, and other incentives as has been used to promote transition to green technologies in other fields.[71-73]

### Conclusions

In summary, respirator reuse technologies are critical to meet the supply demands imparted by COVID-19, especially in low-resource settings. This need is emphasized by the likelihood that respirators will continue to be commonly used even after widespread vaccination and post-pandemic in certain scenarios, such as healthcare and crowded transportation areas, and such technologies can enable more sustainable use of respirators moving forward. Furthermore, these technologies can save billions of dollars that can be redistributed toward other efforts for economic and environmental recovery brought on by the pandemic. Further study is needed regarding reuse fit and filtration efficacy to minimize health risks associated with reuse strategies. Additionally, future development of low-cost, low-tech technologies to enable respirator and/or filter decontamination is needed to further minimize the economic and environmental costs of respirators.

### Footnotes

**Contributors:** JNC, OG, JC, CH, and GT conceived and designed the analysis. JB, AW, PRC, and FD contributed data. JNC, OG, and JC collected data and performed the analysis. JNC, OG, JC, and GT wrote the manuscript. JNC, OG, JC, JB, AW, PRC, FD, CH, and GT interpreted the data and reviewed and approved the manuscript. The corresponding author, GT, provided supervision over the study and is the guarantor. GT confirms that all authors meet the authorship criteria and no contributing authors have been omitted.

**Funding:** JNC: 5T32DK007191; OG: MIT Undergraduate Research Opportunities Program, N/A; PC: NIH K23DA044874, R44DA051106 ; GT: Karl van Tassel (1925) Career Development Professorship, Department of Mechanical Engineering, MIT.

**Competing interests:** The authors declare the following competing financial interest(s): AJW, JDB, and GT have filed multiple patents surrounding the respirator and sensors. In addition, AJW, JDB and GT have a financial interest in TEAL Bio, a biotechnology company focused on developing the next generation of personal protective equipment. JNC, PRC, OG, JC, FD, and CH declare no competing interests.

**Data Sharing:** All data is included in the manuscript and/or supplementary materials, no additional data is available.

GT provides attestation that this study reflects honest and accurate data and transparent disclosure of all relevant information. Nothing has been omitted or withheld from this study.

**Fig. 1** Comparison of the following per respirator reuse strategy: A) number of respirators or surgical masks used, B) costs in billions of USD, C) waste generated in millions of kg, D) waste generated per strategy in the equivalent number of 747 airplanes by mass (mass of one 747 airplane, 333,000 kg).

## References

1. Ranney ML, Griffeth V, Jha AK. Critical Supply Shortages — The need for ventilators and personal protective equipment during the Covid-19 pandemic. *N Engl J Med* 2020;382(18):e41-e41. doi: 10.1056/nejmp2006141
2. Remuzzi A, Remuzzi G. COVID-19 and Italy: what next? *The Lancet* 2020;395(10231):1225-28. doi: 10.1016/s0140-6736(20)30627-9
3. Livingston E, Desai A, Berkwits M. Sourcing personal protective equipment during the COVID-19 pandemic. *JAMA* 2020;323(19):1912-14. doi: 10.1001/jama.2020.5317
4. Garcia Godoy LR, Jones AE, Anderson TN, et al. Facial protection for healthcare workers during pandemics: a scoping review. *BMJ Glob Health* 2020;5(5):e002553. doi: 10.1136/bmjgh-2020-002553
5. Rubio-Romero JC, Pardo-Ferreira MdC, Torrecilla-García JA, et al. Disposable masks: Disinfection and sterilization for reuse, and non-certified manufacturing, in the face of shortages during the COVID-19 pandemic. *Saf Sci* 2020;129:104830-30. doi: 10.1016/j.ssci.2020.104830
6. Books B. Final Report for the Bioquell Hydrogen Peroxide Vapor (HPV) Decontamination for Reuse of N95 Respirators: *Battelle* 2016; <https://www.fda.gov/media/136386/download> (accessed June 2020).
7. Battelle. Battelle CCDS FAQ 2020 [Updated April, 2020; web page was removed] <https://www.battelle.org/inb/battelle-ccds-for-covid19-satellite-locations> (accessed May 2020).
8. Fisher EM, Shaffer RE. Considerations for recommending extended use and limited reuse of filtering facepiece respirators in health care settings. *J Occup Environ Hyg* 2014;11(8):D115-D28. doi: 10.1080/15459624.2014.902954
9. Gilbert RM, Donzanti MJ, Minahan DJ, et al. Mask reuse in the COVID-19 pandemic: Creating an inexpensive and scalable ultraviolet system for filtering facepiece respirator decontamination. *Glob Health Sci Pract* 2020;8(3):582-95. doi: 10.9745/GHSP-D-20-00218
10. Byrne JD, Wentworth AJ, Chai PR, et al. Injection molded autoclavable, scalable, conformable (iMASC) system for aerosol-based protection: a prospective single-arm feasibility study. *BMJ Open* 2020;10(7):e039120-e20. doi: 10.1136/bmjopen-2020-039120
11. Lowe J, Paladino K, Farke JD, et al. N95 Filtering Facepiece Respirator Ultraviolet Germicidal Irradiation (UVGI) Process for Decontamination and Reuse. *Nebraska Medicine* 2020; <https://www.nebraskamed.com/sites/default/files/documents/covid-19/n-95-decon-process.pdf> (accessed June 2020).
12. Kroo L, Kothari A, Hannebelle M, et al. Pneumask: Modified full-face snorkel masks as reusable personal protective equipment for hospital personnel. *medRxiv* 2020:2020.04.24.20078907. doi: 10.1101/2020.04.24.20078907 %J
13. Pneumask. The Pneumask Project. 2020; <https://www.pneumask.org/> (accessed April 2020).
14. Chua MH, Cheng W, Goh SS, et al. Face masks in the new COVID-19 normal: materials, testing, and perspectives. *Research Wash DC* 2020;2020:1-40. doi: 10.34133/2020/7286735
15. Palmieri V, De Maio F, De Spirito M, et al. Face masks and nanotechnology: Keep the blue side up. *Nano Today* 2021;37:101077. doi: 10.1016/j.nantod.2021.101077 [published Online First: 2021/02/02]
16. M1 J. Smile again JELLI M1. 2021; <https://jellim.com/> (accessed April 2021).
17. ClearMask. See the person, not the mask.™ 2021; <https://www.theclearmask.com/> (accessed April 2021).
18. Kumar A, Sharma A, Chen Y, et al. Copper@ZIF-8 core-shell nanowires for reusable antimicrobial face masks. *Adv Funct Mater* 2021;31(10):2008054-n/a. doi: 10.1002/adfm.202008054
19. Klemeš JJ, Fan YV, Jiang P. The energy and environmental footprints of COVID-19 fighting measures – PPE, disinfection, supply chains. *Energy (Oxford)* 2020;211:118701-01. doi: 10.1016/j.energy.2020.118701
20. Prata JC, Silva ALP, Walker TR, et al. COVID-19 pandemic repercussions on the use and management of plastics. *Environ Sci Technol* 2020;54(13):7760-65. doi: 10.1021/acs.est.0c02178
21. Klemeš JJ, Fan YV, Tan RR, et al. Minimising the present and future plastic waste, energy and environmental footprints related to COVID-19. *Renew Sust Energ Rev* 2020;127:109883-83. doi: 10.1016/j.rser.2020.109883
22. Sarkodie SA, Owusu PA. Impact of COVID-19 pandemic on waste management. *Environ, Dev and Sus* 2021;23(5):7951-10. doi: 10.1007/s10668-020-00956-y
23. Jiang P, Klemeš JJ, Fan YV, et al. More is not enough: A deeper understanding of the COVID-19 impacts on healthcare, energy and environment is crucial. *Int J Environ Res Public Health* 2021;18(2):684. doi: 10.3390/ijerph18020684

24. Chhabria P. Coronavirus: "The masks you throw away could end up killing a whale": *BBC* 2020. <https://www.bbc.com/news/av/science-environment-53287940> (accessed August, 2020).
25. Leung H. Why wearing a face mask is encouraged in asia, but shunned in the U.S. *Time* 2020 <https://time.com/5799964/coronavirus-face-mask-asia-us/2020> (accessed April 2020).
26. Jennings R. COVID-19 pandemic: how cultural differences help asian countries beat COVID-19, while US struggles. *Voice of America* 2020; <https://www.voanews.com/covid-19-pandemic/how-cultural-differences-help-asian-countries-beat-covid-19-while-us-struggles> (accessed August 2020).
27. Burgess A, Horii M. Risk, ritual and health responsabilisation: Japan's 'safety blanket' of surgical face mask-wearing. *Sociol Health Illn* 2012;34(8):1184-98. doi: 10.1111/j.1467-9566.2012.01466.x
28. Konyn C. Another side effect of COVID-19: the surge in plastic pollution/ *Earth.org*. 2020 <https://earth.org/covid-19-surge-in-plastic-pollution/2020> (accessed August 2020).
29. 3M. Science. Applied to Life. 3M™ Disposable Respirator 1860, 1860S, N95. Products. 2020; <https://multimedia.3m.com/mws/media/15389790/3m-disposable-respirator-1860-1860s-technical-data-sheet.pdf> (accessed June 2020).
30. United States Census Bureau. U.S. Population 2019. Quick Facts. <https://www.census.gov/quickfacts/fact/table/US/PST045219> (accessed June 2020).
31. Carias C, Rainisch G, Shankar M, et al. Potential demand for respirators and surgical masks during a hypothetical influenza pandemic in the United States. *Clin Infect Dis* 2015;60 Suppl 1(suppl\_1):S42-S51. doi: 10.1093/cid/civ141
32. CDC. Healthcare Workers The National Institute for Occupational Safety and Health (NIOSH) *CDC*2017; <https://www.cdc.gov/niosh/topics/healthcare/default.html> (accessed June 2020).
33. Kaisers Family Foundation. Total Healthcare Employment. 2018; <https://www.kff.org/other/state-indicator/total-health-care-employment/?currentTimeframe=0&sortModel=%7B%22colId%22:%22Location%22,%22sort%22:%22sc%22%7D> (accessed June 2020).
34. ADESSO. 3 Ply Disposable Personal Protective Face Mask (50 Masks/Box) 2021; <https://www. adesso.com/product/3-ply-disposable-face-mask-with-ear-loop-non-medical-pack-of-50/> (accessed March 2021).
35. MDS Associates. Disposable Face Masks: Fluidshield® Level 1 Sensitive Skin Covers. 2020; <https://www.mdsassociates.com/catalog/p-107720/fluidshield-level-1-sensitive-skin-covers> (accessed June 2021).
36. Mukerji S, MacIntyre CR, Seale H, et al. Cost-effectiveness analysis of N95 respirators and medical masks to protect healthcare workers in China from respiratory infections. *BMC Infect Dis* 2017;17(1):464-64. doi: 10.1186/s12879-017-2564-9
37. Asadi S, Cappa CD, Barreda S, et al. Efficacy of masks and face coverings in controlling outward aerosol particle emission from expiratory activities. *Sci Rep* 2020;10(1):15665-65. doi: 10.1038/s41598-020-72798-7
38. Silverman JD, Hupert N, Washburne AD. Using influenza surveillance networks to estimate state-specific prevalence of SARS-CoV-2 in the United States. *Sci Transl Med*2020;12(554):eabc1126. doi: 10.1126/scitranslmed.abc1126
39. Gostin LO, Cohen IG, Koplan JP. Universal masking in the United States: the role of mandates, health education, and the CDC. *JAMA* 2020;324(9):837-38. doi: 10.1001/jama.2020.15271
40. Czubryt MP, Stecy T, Popke E, et al. N95 mask reuse in a major urban hospital: COVID-19 response process and procedure. *J Hosp Infect* 2020;106(2):277-82. doi: 10.1016/j.jhin.2020.07.035
41. UCSF Philip R. Lee Institute for Health Policy Studies. ICU Outcomes. 2020; <https://healthpolicy.ucsf.edu/icu-outcomes> (accessed August 2020).
42. Agency for Healthcare Research and Quality. Overview of U.S. Hospital Stays in 2016: Variation by Geographic Region. 2018; <https://www.hcup-us.ahrq.gov/reports/statbriefs/sb246-Geographic-Variation-Hospital-Stays.jsp> (accessed August 2020).
43. Hunter A, Johnson L, Coustasse A. Reduction of Intensive Care Unit Length of Stay: The Case of Early Mobilization. *Health Care Manag* 2020;39(3):109-16. doi: 10.1097/HCM.0000000000000295
44. Lewnard JA, Liu VX, Jackson ML, et al. Incidence, clinical outcomes, and transmission dynamics of severe coronavirus disease 2019 in California and Washington: prospective cohort study. *BMJ* 2020;369:m2205-m05. doi: 10.1136/bmj.m2205

- 1  
2  
3  
4  
5  
6  
7  
8  
9  
10  
11  
12  
13  
14  
15  
16  
17  
18  
19  
20  
21  
22  
23  
24  
25  
26  
27  
28  
29  
30  
31  
32  
33  
34  
35  
36  
37  
38  
39  
40  
41  
42  
43  
44  
45  
46  
47  
48  
49  
50  
51  
52  
53  
54  
55  
56  
57  
58  
59  
60
45. The COVID Tracking Project. National Hospitalization.[updated November 16<sup>th</sup>, 2020; Cumulative hospitalization data was removed from the website]. 2020; <https://covidtracking.com/data/national/hospitalization> (accessed August 2020).
  46. Bartsch SM, Ferguson MC, McKinnell JA, et al. The potential health care costs and resource use associated with COVID-19 in the United States. Project Hope. *Health Aff* 2020;39(6):101377hlthaff202000426-935C. doi: 10.1377/hlthaff.2020.00426
  47. American Hospital Association. Fast Facts on U.S. Hospitals. 2020; <https://www.aha.org/statistics/fast-facts-us-hospitals> (accessed August 2020).
  48. O'Hearn K, Gertsman S, Sampson M, et al. Decontaminating N95 and SN95 masks with ultraviolet germicidal irradiation does not impair mask efficacy and safety. *J Hosp Infect* 2020;106(1):163-75. doi: 10.1016/j.jhin.2020.07.014 [published Online First: 2020/07/21]
  49. . Brickman J, Scott C, Courtad C, et al. Optimization, Validation, and Implementation of a UV Disinfection Method for N95 Face Masks. *University of Chicago* 2020; <https://static1.squarespace.com/static/5e8126f89327941b9453eeef/t/5eacab4783c6b418d137baf3/1588374356749/UCMC+Surfacide+Mask+UVGI+Process+Validation+and+Process+v6.pdf> (accessed August 2020).
  50. Liao L, Xiao W, Zhao M, et al. Can N95 Respirators Be Reused after Disinfection? How Many Times? *ACS Nano* 2020;14(5):6348-56. doi: 10.1021/acsnano.0c03597
  51. Wigginton KR, Arts PJ, Clack HL, et al. Validation of N95 filtering facepiece respirator decontamination methods available at a large university hospital. *Open Forum Infect Dis* 2021;8(2):ofaa610-ofaa10. doi: 10.1093/ofid/ofaa610
  52. Ostriker R. Boston Hospitals getting 'game changer' machine that sterilizes 80,000 protective masks a day. *The Boston Globe* 2020; <https://www.bostonglobe.com/2020/04/02/metro/boston-hospitals-getting-game-changer-machine-that-sterilizes-80000-protective-masks-day/> (accessed March 2021).
  53. The UPS Store. Estimate Shipping Cost. 2021; <https://www.theupsstore.com/tools/estimate-shipping-cost> (accessed March 2021).
  54. Ou Q, Pei C, Chan Kim S, et al. Evaluation of decontamination methods for commercial and alternative respirator and mask materials – view from filtration aspect. *J Aerosol Sci* 2020;150:105609-09. doi: 10.1016/j.jaerosci.2020.105609
  55. de Robles D, Kramer SW. Improving indoor air quality through the use of ultraviolet technology in commercial buildings. *Procedia Eng* 2017;196:888-94. doi: 10.1016/j.proeng.2017.08.021
  56. Snell K. What's Inside The Senate's \$2 Trillion Coronavirus Aid Package. *NPR* 2020; <https://www.npr.org/2020/03/26/821457551/whats-inside-the-senate-s-2-trillion-coronavirus-aid-package2020> (accessed June 2020).
  57. 3M. Get the Facts. N95 Respirator Pricing. 2020; <https://multimedia.3m.com/mws/media/18621790/get-the-facts-n95-respirator-pricing.pdf> (accessed June 2021).
  58. MSC Industrial Direct Company. 3M Series 7500, Size L Half Mask Respirator. 2020; <https://www.mscdirect.com/product/details/71855167> (accessed August 2020).
  59. MSC Industrial Direct Company. Product details 3M P100 filters, series 2000. 2020; <https://www.mscdirect.com/product/details/00324533> (accessed August 2020).
  60. Chalikonda S, Waltenbaugh H, Angelilli S, et al. Implementation of an elastomeric mask program as a strategy to eliminate disposable N95 mask use and reesterilization: results from a large academic medical center. *J Am Coll Surg* 2020;231(3):333-38. doi: 10.1016/j.jamcollsurg.2020.05.022 [published Online First: 2020/06/15]
  61. Indiamart. Face Mask (3 Ply Non-Woven With Ties And Full Weld). 2021; <https://www.indiamart.com/proddetail/face-mask-3-ply-non-woven-with-ties-and-full-weld-4324828512.html> (accessed March 2021).
  62. Kortepeter M. Why You'll Still Need To Wear A Mask Even After Covid-19 Vaccines Arrive *Forbes* 2020; [updated October 20]; <https://www.forbes.com/sites/coronavirusfrontlines/2020/10/20/why-youll-still-need-to-wear-a-mask-even-after-covid-19-vaccines-arrive/?sh=600022ab5a42> (accessed March 2021).
  63. Scipioni J. Dr. Fauci says masks, social distancing will still be needed after a Covid-19 vaccine—here's why *CNBC* 2020 [updated November 16]; <https://www.cNBC.com/2020/11/16/fauci-why-still-need-masks-social-distancing-after-covid-19-vaccine.html> (accessed March 2021).
  64. BBC News. Covid: Masks and social distancing 'could last years'. 2021; <https://www.bbc.com/news/uk-56475807> (accessed March 2021).

- 1  
2  
3 65. CDC. Recommended Guidance for Extended Use and Limited Reuse of N95 Filtering Facepiece Respirators in  
4 Healthcare Settings. 2020. [Web page has been removed];  
5 <https://www.cdc.gov/niosh/topics/hcwcontrols/recommendedguidanceextuse.html> (accessed March 2020).  
6 66. Clinical Evidence Assessment. Safety of Extended Use and Reuse of N95 Respirator. *ECRI* 2020;  
7 [https://www.elsevier.com/\\_data/assets/pdf\\_file/0006/997863/COVID-ECRI-N95-Respirators\\_2020-](https://www.elsevier.com/_data/assets/pdf_file/0006/997863/COVID-ECRI-N95-Respirators_2020-03.pdf)  
8 [03.pdf](https://www.elsevier.com/_data/assets/pdf_file/0006/997863/COVID-ECRI-N95-Respirators_2020-03.pdf) (accessed April 2020).  
9 67. Fischer RJ, Morris DH, van Doremalen N, et al. Effectiveness of N95 respirator decontamination and reuse  
10 against SARS-CoV-2 virus. *Emerg Infect Dis* 2020;26(9):2253-55. doi: 10.3201/eid2609.201524  
11 68. Hofheinz E. Environmental Impact of Disposable vs. Reusable Instruments *Orthopedics This Week, Spine* 2020;  
12 <https://ryortho.com/breaking/environmental-impact-of-disposable-vs-reusable-instruments/> (accessed June  
13 2021).  
14 69. Patricio Silva AL, Prata JC, Walker TR, et al. Increased plastic pollution due to COVID-19 pandemic:  
15 Challenges and recommendations. *Chemical Eng J* 2021;405:126683-83. doi: 10.1016/j.cej.2020.126683  
16 70. Robert E. Fischell Institute for Biomedical Devices. Researchers Develop Rapid Deployment Mask. *University*  
17 *of Maryland* 2020; <https://fischellinstitute.umd.edu/news/story/researchers-develop-rapid-deployment-mask>  
18 (accessed April 2020).  
19 71. U.S. Energy Information Administration. Renewable Energy Explained: Incentives. 2021;  
20 <https://www.eia.gov/energyexplained/renewable-sources/incentives.php> (accessed March 2020).  
21 72. Lobel R, Perakis G. Consumer choice model for forecasting demand and designing incentives for solar  
22 technology. *SSRN Elect J* 2011; doi: 10.2139/ssrn.1748424  
23 73. Singh N, Tang Y, Ogunseitan OA. Environmentally sustainable management of used personal protective  
24 equipment. *Environ Sci Technol* 2020;54(14):8500-02. doi: 10.1021/acs.est.0c03022  
25  
26  
27  
28  
29  
30  
31  
32  
33  
34  
35  
36  
37  
38  
39  
40  
41  
42  
43  
44  
45  
46  
47  
48  
49  
50  
51  
52  
53  
54  
55  
56  
57  
58  
59  
60



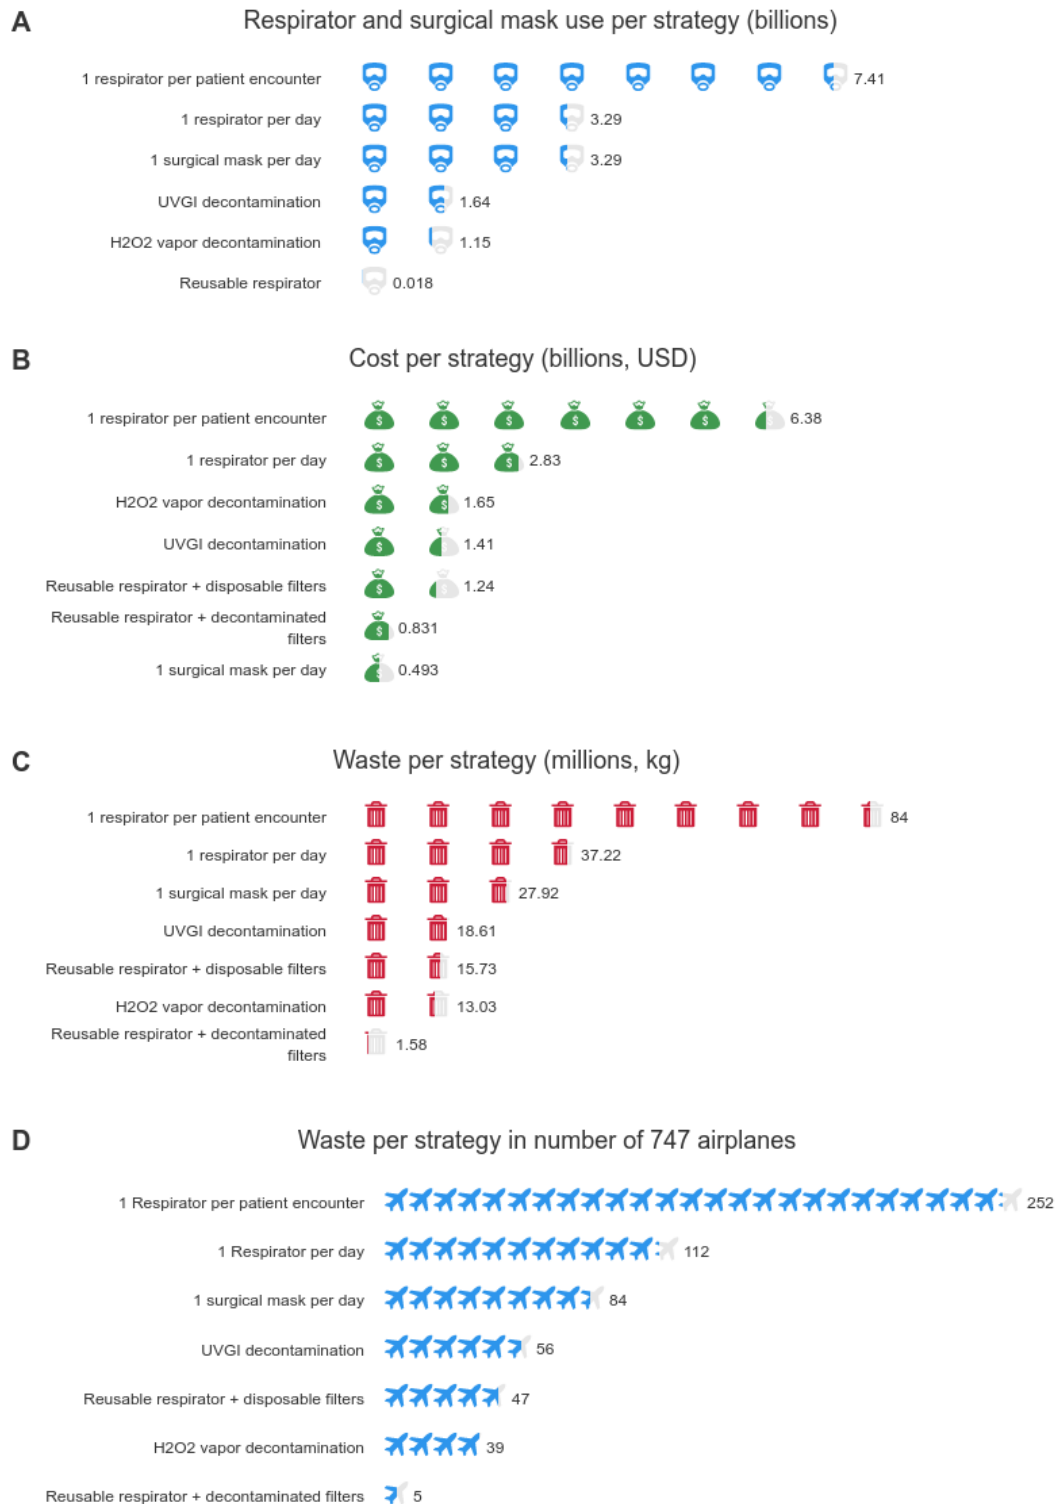

**Fig. 1** Comparison of the following per respirator reuse strategy: A) number of respirators or surgical masks used, B) costs in billions of USD, C) waste generated in millions of kg, D) waste generated per strategy in the equivalent number of 747 airplanes by mass (mass of one 747 airplane, 333,000 kg).

**Supplementary Table 1 Sensitivity analysis: H<sub>2</sub>O<sub>2</sub> decontamination strategy cost**

| Base system cost | Shipping cost | Respirator cost | Overall cost accumulated (USD) |
|------------------|---------------|-----------------|--------------------------------|
| \$268 million    | \$250 million | \$989 million   | \$1.51 billion                 |
| \$415 million    | \$250 million | \$989 million   | \$1.65 billion                 |
| \$3.74 billion   | \$250 million | \$989 million   | \$4.98 billion                 |

**Supplementary Table 2 Sensitivity analysis: Disposable Gerson 1730 respirator\***

| Respirator strategy                                           | Number of respirators required | Cost accumulated (USD)        | Waste generated (kg)        |
|---------------------------------------------------------------|--------------------------------|-------------------------------|-----------------------------|
| 1 per patient (all hospitalized patients)                     | 7.41 (7.22-7.59) billion       | \$6.52 (6.35-6.68) billion    | 126.0 (122.7-129.0) million |
| 1 per day                                                     | 3.29 (3.10-3.47) billion       | \$2.89 (2.73-3.05) billion    | 55.85 (52.74-58.95) million |
| UVGI-decontaminated N95 respirators                           | 1.64 (1.55-1.73) billion       | \$1.45 (1.37-1.53) billion    | 27.92 (26.37-29.47) million |
| H <sub>2</sub> O <sub>2</sub> -decontaminated N95 respirators | 1.15 (1.09-1.21) billion       | \$1.68 (1.62-1.73) billion    | 19.55 (18.46-20.63) million |
| Reusable respirator + disposable filters                      | 0.018 (0.017-0.019) billion    | \$1.27 (1.20-1.34) billion    | 23.18 (21.93-24.42) million |
| Reusable respirator + decontaminated filters                  | 0.018 (0.017-0.019) billion    | \$0.833 (0.824-0.842) billion | 1.955 (1.893-2.017) million |

\*The weight of one Gerson 1730 N95 Respirator is equal to 17g

**Supplementary Table 3 Sensitivity Analysis: Variable Market Costs for Disposable Respirators**

| Respirator strategy                                                   | Cost of one 3M 1860 N95 respirator |                                | Cost of one 3M 1860 N95 respirator |                                |
|-----------------------------------------------------------------------|------------------------------------|--------------------------------|------------------------------------|--------------------------------|
|                                                                       | \$0.86 (base case)                 | \$1.27                         | Cost accumulated (USD)             | Cost accumulated (USD)         |
| 1 per patient encounter                                               | \$6.38 (6.21-6.52) billion         | \$16.09 (15.67-16.46) thousand | \$9.42 (9.17-9.64) billion         | \$23.76 (23.13-24.31) thousand |
| 1 per day                                                             | \$2.83 (2.67-2.98) billion         | \$7.13 (6.73-7.52) thousand    | \$4.17 (3.94-4.40) billion         | \$10.53 (9.94-11.11) thousand  |
| UVGI-decontaminated 3M 1860 N95 respirators                           | \$1.41 (1.33-1.49) billion         | \$3.56 (3.37-3.76) thousand    | \$2.09 (1.97-2.20) billion         | \$5.26 (4.97-5.56) thousand    |
| H <sub>2</sub> O <sub>2</sub> -decontaminated 3M 1860 N95 respirators | \$1.65 (1.60-1.71) billion         | \$4.17 (4.03-4.31) thousand    | \$2.13 (2.04-2.21) billion         | \$5.36 (5.16-5.57) thousand    |
| Reusable TEAL respirator + disposable filters                         | \$1.24 (1.17-1.31) billion         | \$3.13 (2.96-3.30) thousand    | \$1.78 (1.68-1.88) billion         | \$4.49 (4.24-4.74) thousand    |
| Reusable TEAL respirator + decontaminated filters                     | \$0.831 (0.822 -0.841) billion     | \$2.10 (2.07 -2.12) thousand   | \$0.858 (0.848 -0.869) billion     | \$2.17 (2.14 -2.19) thousand   |
| Surgical mask, 1 per day                                              | \$0.460 (0.434-0.485) billion      | \$1.16 (1.10-1.23) thousand    | \$0.460 (0.434-0.485) billion      | \$1.16 (1.10-1.23) thousand    |

**Supplementary Table 4 Sensitivity analysis: Reusable elastomeric respirator + disposable p100 filter**

| Parameter                               | Value                      |
|-----------------------------------------|----------------------------|
| Number of respirators required          | 18 (17-19) million         |
| Number of filters required (by pair)    | 108 (102-114) million      |
| <b>Results</b>                          |                            |
| Reusable respirator + filter cost (USD) | \$2.14 (2.02-2.26) billion |
| Reusable respirator + filter waste (kg) | 3.41 (3.22-3.59) million   |

**Supplementary Table 5 Sensitivity analysis: H<sub>2</sub>O<sub>2</sub> decontamination system respirator discard rate**

| Discard rate | Number of respirators required | Cost accumulated (USD)     | Waste generated (kg)     |
|--------------|--------------------------------|----------------------------|--------------------------|
| 10%          | 493 (465-520) million          | \$1.09 (1.07-1.11) billion | 5.58 (5.27-5.89) million |

|     |                          |                             |                             |
|-----|--------------------------|-----------------------------|-----------------------------|
| 30% | 1.15 (1.09-1.21) billion | \$1.65 (1.60-1.71) billion  | 13.03 (12.30-13.75) million |
| 50% | 1.81 (1.71-1.91) billion | \$2.22 (2.13 -2.31) billion | 20.47 (19.33-21.61) million |

**Supplementary Table 6 Sensitivity analysis: Maximum cycles of decontamination per respirator for H<sub>2</sub>O<sub>2</sub> decontamination system**

| Number cycles | Number of respirators required | Cost accumulated (USD)     | Waste generated (kg)        |
|---------------|--------------------------------|----------------------------|-----------------------------|
| 10            | 1.31 (1.24-1.39) billion       | \$1.80 (1.73-1.86) billion | 14.89 (14.06-15.71) million |
| 20            | 1.15 (1.09-1.21) billion       | \$1.65 (1.60-1.71) billion | 13.03 (12.30-13.75) million |

**Supplementary Table 7 Sensitivity analysis: UVGI decontamination strategy cost\***

| Parameter                                                       | Value                      |
|-----------------------------------------------------------------|----------------------------|
| Cost of 2 surgical suite UVGI system                            | \$40,000.00                |
| Cost of repurposed or low tech UVGI lamp system                 | \$50.00                    |
| <b>Results</b>                                                  |                            |
| Base cost                                                       | \$1.41 (1.33-1.49) billion |
| Base cost + cost of 2 surgical suite UVGI systems               | \$1.42 (1.34-1.49) billion |
| Base cost + cost of repurposed or low tech UVGI lamp system     | \$1.41 (1.33-1.49) billion |
| *Assuming distribution across hypothetical 60 sites across U.S. |                            |

**Supplementary Table 8 Sensitivity analysis: UVGI decontamination system discard rate**

| Discard rate | Number of respirators required | Cost accumulated (USD)     | Waste generated (kg)        |
|--------------|--------------------------------|----------------------------|-----------------------------|
| 10%          | 986 (931-1040) million         | \$848 (800-895) million    | 11.17 (10.55-11.79) million |
| 30%          | 1.64 (1.55-1.73) billion       | \$1.41 (1.33-1.49) billion | 18.61 (17.58-19.64) million |
| 50%          | 2.30 (2.17-2.43) billion       | \$1.98 (1.87-2.09) billion | 26.05 (24.61-27.50) million |

**Supplementary Table 9 Sensitivity analysis: Maximum cycles of decontamination per respirator for UVGI decontamination system**

| Number cycles | Number of respirators required | Cost accumulated (USD)     | Waste generated (kg)        |
|---------------|--------------------------------|----------------------------|-----------------------------|
| 2             | 2.63 (2.48-2.77) billion       | \$2.26 (2.13-2.39) billion | 29.78 (28.12-31.43) million |
| 5             | 1.64 (1.55-1.73) billion       | \$1.41 (1.33-1.49) billion | 18.61 (17.58-19.64) million |
