# Supplementary material for: Thinking green: modelling respirator reuse strategies to reduce cost and waste
Source: PubMed Central journal article supplement — BMJ Open. 2021 Jul 18;11(7):e048687. doi: 10.1136/bmjopen-2021-048687 (PMC8290946; doi:10.1136/bmjopen-2021-048687), 2021-07-18
Supplement: bmjopen-2021-048687supp001.pdf [file bmjopen-2021-048687supp001.pdf]

**Supplementary Table 1 Sensitivity analysis: H<sub>2</sub>O<sub>2</sub> decontamination strategy cost**

| Base system cost | Shipping cost | Respirator cost | Overall cost accumulated (USD) |
|------------------|---------------|-----------------|--------------------------------|
| \$268 million    | \$250 million | \$989 million   | \$1.51 billion                 |
| \$415 million    | \$250 million | \$989 million   | \$1.65 billion                 |
| \$3.74 billion   | \$250 million | \$989 million   | \$4.98 billion                 |

**Supplementary Table 2 Sensitivity analysis: Disposable Gerson 1730 respirator\***

| Respirator strategy                                           | Number of respirators required | Cost accumulated (USD)        | Waste generated (kg)        |
|---------------------------------------------------------------|--------------------------------|-------------------------------|-----------------------------|
| 1 per patient (all hospitalized patients)                     | 7.41 (7.22-7.59) billion       | \$6.52 (6.35-6.68) billion    | 126.0 (122.7-129.0) million |
| 1 per day                                                     | 3.29 (3.10-3.47) billion       | \$2.89 (2.73-3.05) billion    | 55.85 (52.74-58.95) million |
| UVGI-decontaminated N95 respirators                           | 1.64 (1.55-1.73) billion       | \$1.45 (1.37-1.53) billion    | 27.92 (26.37-29.47) million |
| H <sub>2</sub> O <sub>2</sub> -decontaminated N95 respirators | 1.15 (1.09-1.21) billion       | \$1.68 (1.62-1.73) billion    | 19.55 (18.46-20.63) million |
| Reusable respirator + disposable filters                      | 0.018 (0.017-0.019) billion    | \$1.27 (1.20-1.34) billion    | 23.18 (21.93-24.42) million |
| Reusable respirator + decontaminated filters                  | 0.018 (0.017-0.019) billion    | \$0.833 (0.824-0.842) billion | 1.955 (1.893-2.017) million |

\*The weight of one Gerson 1730 N95 Respirator is equal to 17g

**Supplementary Table 3 Sensitivity Analysis: Variable Market Costs for Disposable Respirators**

| Cost of one 3M 1860 N95 respirator                                    | \$0.86 (base case)            |                                    | \$1.27                        |                                    |
|-----------------------------------------------------------------------|-------------------------------|------------------------------------|-------------------------------|------------------------------------|
| Respirator strategy                                                   | Cost accumulated (USD)        | Cost accumulated (USD) per patient | Cost accumulated (USD)        | Cost accumulated (USD) per patient |
| 1 per patient encounter                                               | \$6.38 (6.21-6.52) billion    | \$16.09 (15.67-16.46) thousand     | \$9.42 (9.17-9.64) billion    | \$23.76 (23.13-24.31) thousand     |
| 1 per day                                                             | \$2.83 (2.67-2.98) billion    | \$7.13 (6.73-7.52) thousand        | \$4.17 (3.94-4.40) billion    | \$10.53 (9.94-11.11) thousand      |
| UVGI-decontaminated 3M 1860 N95 respirators                           | \$1.41 (1.33-1.49) billion    | \$3.56 (3.37-3.76) thousand        | \$2.09 (1.97-2.20) billion    | \$5.26 (4.97-5.56) thousand        |
| H <sub>2</sub> O <sub>2</sub> -decontaminated 3M 1860 N95 respirators | \$1.65 (1.60-1.71) billion    | \$4.17 (4.03-4.31) thousand        | \$2.13 (2.04-2.21) billion    | \$5.36 (5.16-5.57) thousand        |
| Reusable TEAL respirator + disposable filters                         | \$1.24 (1.17-1.31) billion    | \$3.13 (2.96-3.30) thousand        | \$1.78 (1.68-1.88) billion    | \$4.49 (4.24-4.74) thousand        |
| Reusable TEAL respirator + decontaminated filters                     | \$0.831 (0.822-0.841) billion | \$2.10 (2.07-2.12) thousand        | \$0.858 (0.848-0.869) billion | \$2.17 (2.14-2.19) thousand        |
| Surgical mask, 1 per day                                              | \$0.460 (0.434-0.485) billion | \$1.16 (1.10-1.23) thousand        | \$0.460 (0.434-0.485) billion | \$1.16 (1.10-1.23) thousand        |

**Supplementary Table 4 Sensitivity analysis: Reusable elastomeric respirator + disposable p100 filter**

| Parameter                               | Value                      |
|-----------------------------------------|----------------------------|
| Number of respirators required          | 18 (17-19) million         |
| Number of filters required (by pair)    | 108 (102-114) million      |
| <b>Results</b>                          |                            |
| Reusable respirator + filter cost (USD) | \$2.14 (2.02-2.26) billion |
| Reusable respirator + filter waste (kg) | 3.41 (3.22-3.59) million   |

**Supplementary Table 5 Sensitivity analysis: H<sub>2</sub>O<sub>2</sub> decontamination system respirator discard rate**

| Discard rate | Number of respirators required | Cost accumulated (USD)     | Waste generated (kg)     |
|--------------|--------------------------------|----------------------------|--------------------------|
| 10%          | 493 (465-520) million          | \$1.09 (1.07-1.11) billion | 5.58 (5.27-5.89) million |

|     |                          |                             |                             |
|-----|--------------------------|-----------------------------|-----------------------------|
| 30% | 1.15 (1.09-1.21) billion | \$1.65 (1.60-1.71) billion  | 13.03 (12.30-13.75) million |
| 50% | 1.81 (1.71-1.91) billion | \$2.22 (2.13 -2.31) billion | 20.47 (19.33-21.61) million |

**Supplementary Table 6 Sensitivity analysis: Maximum cycles of decontamination per respirator for H<sub>2</sub>O<sub>2</sub> decontamination system**

| Number cycles | Number of respirators required | Cost accumulated (USD)     | Waste generated (kg)        |
|---------------|--------------------------------|----------------------------|-----------------------------|
| 10            | 1.31 (1.24-1.39) billion       | \$1.80 (1.73-1.86) billion | 14.89 (14.06-15.71) million |
| 20            | 1.15 (1.09-1.21) billion       | \$1.65 (1.60-1.71) billion | 13.03 (12.30-13.75) million |

**Supplementary Table 7 Sensitivity analysis: UVGI decontamination strategy cost\***

| Parameter                                                       | Value                      |
|-----------------------------------------------------------------|----------------------------|
| Cost of 2 surgical suite UVGI system                            | \$40,000.00                |
| Cost of repurposed or low tech UVGI lamp system                 | \$50.00                    |
| <b>Results</b>                                                  |                            |
| Base cost                                                       | \$1.41 (1.33-1.49) billion |
| Base cost + cost of 2 surgical suite UVGI systems               | \$1.42 (1.34-1.49) billion |
| Base cost + cost of repurposed or low tech UVGI lamp system     | \$1.41 (1.33-1.49) billion |
| *Assuming distribution across hypothetical 60 sites across U.S. |                            |

**Supplementary Table 8 Sensitivity analysis: UVGI decontamination system discard rate**

| Discard rate | Number of respirators required | Cost accumulated (USD)     | Waste generated (kg)        |
|--------------|--------------------------------|----------------------------|-----------------------------|
| 10%          | 986 (931-1040) million         | \$848 (800-895) million    | 11.17 (10.55-11.79) million |
| 30%          | 1.64 (1.55-1.73) billion       | \$1.41 (1.33-1.49) billion | 18.61 (17.58-19.64) million |
| 50%          | 2.30 (2.17-2.43) billion       | \$1.98 (1.87-2.09) billion | 26.05 (24.61-27.50) million |

**Supplementary Table 9 Sensitivity analysis: Maximum cycles of decontamination per respirator for UVGI decontamination system**

| Number cycles | Number of respirators required | Cost accumulated (USD)     | Waste generated (kg)        |
|---------------|--------------------------------|----------------------------|-----------------------------|
| 2             | 2.63 (2.48-2.77) billion       | \$2.26 (2.13-2.39) billion | 29.78 (28.12-31.43) million |
| 5             | 1.64 (1.55-1.73) billion       | \$1.41 (1.33-1.49) billion | 18.61 (17.58-19.64) million |
